# Supplementary material
Source: publisher figshare collection journal article supplement (https://acs.figshare.com/ndownloader/files/4063072)
Supplement: Supplementary file 1 [file 4063072]

 
data_trisTMS 
 
_audit_creation_method            SHELXL-97 
_chemical_name_systematic 
; 
 ? 
; 
_chemical_name_common             ? 
_chemical_melting_point           ? 
_chemical_formula_moiety          
 'C21 H27 F3 Si3'  
 
_chemical_formula_sum 
 'C21 H27 F3 Si3' 
_chemical_formula_weight          420.70 
 
loop_ 
 _atom_type_symbol 
 _atom_type_description 
 _atom_type_scat_dispersion_real 
 _atom_type_scat_dispersion_imag 
 _atom_type_scat_source 
 'C'  'C'   0.0033   0.0016 
 'International Tables Vol C Tables 4.2.6.8 and 6.1.1.4' 
 'H'  'H'   0.0000   0.0000 
 'International Tables Vol C Tables 4.2.6.8 and 6.1.1.4' 
 'F'  'F'   0.0171   0.0103 
 'International Tables Vol C Tables 4.2.6.8 and 6.1.1.4' 
 'Si'  'Si'   0.0817   0.0704 
 'International Tables Vol C Tables 4.2.6.8 and 6.1.1.4' 
 
_symmetry_cell_setting            trigonal 
_symmetry_space_group_name_H-M    P31c 
_symmetry_space_group_name_Hall   'P 3 -2c'
 
loop_ 
 _symmetry_equiv_pos_as_xyz 
 'x, y, z' 
 '-y, x-y, z' 
 '-x+y, -x, z' 
 'y, x, z+1/2' 
 '-x, -x+y, z+1/2' 
 'x-y, -y, z+1/2' 
 
_cell_length_a                    12.3731(3) 
_cell_length_b                    12.3731(3) 
_cell_length_c                    9.8020(4) 
_cell_angle_alpha                 90.00 
_cell_angle_beta                  90.00 
_cell_angle_gamma                 120.00 
_cell_volume                      1299.58(7) 
_cell_formula_units_Z             2 
_cell_measurement_temperature     293(2) 
_cell_measurement_reflns_used     2404 
_cell_measurement_theta_min       3.8031  
_cell_measurement_theta_max       27.4955  
 
_exptl_crystal_description        prism 
_exptl_crystal_colour             white 
_exptl_crystal_size_max           0.25 
_exptl_crystal_size_mid           0.23 
_exptl_crystal_size_min           0.20 
_exptl_crystal_density_meas       ? 
_exptl_crystal_density_diffrn     1.075 
_exptl_crystal_density_method     'not measured' 
_exptl_crystal_F_000              444 
_exptl_absorpt_coefficient_mu     0.207 
_exptl_absorpt_correction_type                              multi-scan
_exptl_absorpt_process_details
;
  [Sheldrick, G.M. (2002). SADABS Bruker AXS Inc., Madison, Wisconsin, USA]
;
_exptl_absorpt_correction_T_min                      0.1

_exptl_absorpt_correction_T_max                      0.1

#----------------------------- Remark ------------------------------------#
# SADABS output:                                                          #
# Estimated minimum and maximum transmission:  0.6626  0.7456 #
# The ratio of these values is more reliable than their absolute values!  #
#-------------------------------------------------------------------------# 
_exptl_special_details 

; 
 ? 
; 
 
_diffrn_ambient_temperature       293(2)
_diffrn_radiation_wavelength      0.71073
_diffrn_radiation_type            MoK\a
_diffrn_radiation_source          'fine-focus sealed tube'
_diffrn_measurement_device_type   'KappaCCD'
_diffrn_measurement_device        '95mm CCD camera on \k-goniostat'
_diffrn_detector_area_resol_mean  9
_diffrn_radiation_monochromator   'horizonally mounted graphite crystal'
_diffrn_measurement_method        'CCD'
_diffrn_standards_number          ? 
_diffrn_standards_interval_count  ? 
_diffrn_standards_interval_time   ? 
_diffrn_standards_decay_%         ? 
_diffrn_reflns_number             12701 
_diffrn_reflns_av_R_equivalents   0.0529 
_diffrn_reflns_av_sigmaI/netI     0.0311 
_diffrn_reflns_limit_h_min        -16 
_diffrn_reflns_limit_h_max        16 
_diffrn_reflns_limit_k_min        -15 
_diffrn_reflns_limit_k_max        16 
_diffrn_reflns_limit_l_min        -11 
_diffrn_reflns_limit_l_max        12 
_diffrn_reflns_theta_min          3.80 
_diffrn_reflns_theta_max          27.50 
_reflns_number_total              1983 
_reflns_number_gt                 1442 
_reflns_threshold_expression      >2sigma(I) 
 
_computing_data_collection        'Collect (Bruker AXS BV, 1997-2004)'
_computing_cell_refinement        'Dirax/lsq (Duisenberg & Schreurs, 1989-2000)'
_computing_data_reduction         'EvalCCD (Duisenberg & Schreurs 1990-2000)'
_computing_structure_solution     'SIR92 (Altomare et al., 1993)'
_computing_structure_refinement   'SHELXL-97 (Sheldrick, 1997)'
_computing_molecular_graphics     'Ortep-3 for Windows (Farrugia, 1997)'
_computing_publication_material   'WinGX publication routines (Farrugia, 1999)'
 
_refine_special_details 
; 
 Refinement of F^2^ against ALL reflections.  The weighted R-factor wR and 
 goodness of fit S are based on F^2^, conventional R-factors R are based 
 on F, with F set to zero for negative F^2^. The threshold expression of 
 F^2^ > 2sigma(F^2^) is used only for calculating R-factors(gt) etc. and is 
 not relevant to the choice of reflections for refinement.  R-factors based 
 on F^2^ are statistically about twice as large as those based on F, and R- 
 factors based on ALL data will be even larger. 
; 
 
_refine_ls_structure_factor_coef  Fsqd  
_refine_ls_matrix_type            full 
_refine_ls_weighting_scheme       calc  
_refine_ls_weighting_details 
 'calc w=1/[\s^2^(Fo^2^)+(0.0647P)^2^+0.1885P] where P=(Fo^2^+2Fc^2^)/3' 
_atom_sites_solution_primary      direct 
_atom_sites_solution_secondary    difmap 
_atom_sites_solution_hydrogens    geom 
_refine_ls_hydrogen_treatment     constr 
_refine_ls_extinction_method      none 
_refine_ls_extinction_coef        ? 
_refine_ls_abs_structure_details 
 'Flack H D (1983), Acta Cryst. A39, 876-881' 
_refine_ls_abs_structure_Flack    -0.1(2) 
_refine_ls_number_reflns          1983 
_refine_ls_number_parameters      105 
_refine_ls_number_restraints      1 
_refine_ls_R_factor_all           0.0743 
_refine_ls_R_factor_gt            0.0471 
_refine_ls_wR_factor_ref          0.1259 
_refine_ls_wR_factor_gt           0.1130 
_refine_ls_goodness_of_fit_ref    1.039 
_refine_ls_restrained_S_all       1.039 
_refine_ls_shift/su_max           0.001 
_refine_ls_shift/su_mean          0.000 
 
loop_ 
 _atom_site_label 
 _atom_site_type_symbol 
 _atom_site_fract_x 
 _atom_site_fract_y 
 _atom_site_fract_z 
 _atom_site_U_iso_or_equiv 
 _atom_site_adp_type 
 _atom_site_occupancy 
 _atom_site_symmetry_multiplicity 
 _atom_site_calc_flag 
 _atom_site_refinement_flags 
 _atom_site_disorder_assembly 
 _atom_site_disorder_group 
Si01 Si 0.79999(7) 1.15211(7) 0.03379(12) 0.0670(3) Uani 1 1 d . . . 
F1 F 0.32269(13) 0.87942(15) 0.0341(2) 0.0703(5) Uani 1 1 d . . . 
C1 C 0.3265(2) 0.7732(2) 0.0338(3) 0.0477(6) Uani 1 1 d . . . 
C2 C 0.4449(2) 0.7840(2) 0.0338(3) 0.0498(7) Uani 1 1 d . . . 
C3 C 0.5579(2) 0.9034(2) 0.0342(3) 0.0572(8) Uani 1 1 d . . . 
C4 C 0.6523(3) 1.0012(3) 0.0346(4) 0.0667(8) Uani 1 1 d . A . 
C5 C 0.8008(6) 1.2419(6) 0.1840(8) 0.115(3) Uani 0.783(7) 1 d P A 1 
H5A H 0.7307 1.2551 0.1796 0.173 Uiso 0.783(7) 1 calc PR A 1 
H5B H 0.8767 1.3210 0.1853 0.173 Uiso 0.783(7) 1 calc PR A 1 
H5C H 0.7954 1.1963 0.2655 0.173 Uiso 0.783(7) 1 calc PR A 1 
C6 C 0.8038(6) 1.2403(6) -0.1228(8) 0.107(2) Uani 0.783(7) 1 d P A 1 
H6A H 0.7349 1.2553 -0.1211 0.161 Uiso 0.783(7) 1 calc PR A 1 
H6B H 0.7978 1.1922 -0.2023 0.161 Uiso 0.783(7) 1 calc PR A 1 
H6C H 0.8807 1.3185 -0.1254 0.161 Uiso 0.783(7) 1 calc PR A 1 
C7 C 0.9262(5) 1.1240(5) 0.0333(17) 0.156(5) Uani 0.783(7) 1 d P A 1 
H7A H 1.0033 1.2021 0.0330 0.234 Uiso 0.783(7) 1 calc PR A 1 
H7B H 0.9218 1.0771 -0.0466 0.234 Uiso 0.783(7) 1 calc PR A 1 
H7C H 0.9223 1.0774 0.1133 0.234 Uiso 0.783(7) 1 calc PR A 1 
C8 C 0.889(3) 1.135(3) -0.115(3) 0.143(13) Uani 0.217(7) 1 d P A 2 
H8A H 0.9683 1.2097 -0.1244 0.214 Uiso 0.217(7) 1 calc PR A 2 
H8B H 0.8417 1.1207 -0.1977 0.214 Uiso 0.217(7) 1 calc PR A 2 
H8C H 0.9014 1.0654 -0.0989 0.214 Uiso 0.217(7) 1 calc PR A 2 
C9 C 0.892(2) 1.127(3) 0.190(4) 0.144(12) Uani 0.217(7) 1 d P A 2 
H9A H 0.9721 1.2009 0.2011 0.217 Uiso 0.217(7) 1 calc PR A 2 
H9B H 0.9024 1.0571 0.1718 0.217 Uiso 0.217(7) 1 calc PR A 2 
H9C H 0.8445 1.1126 0.2729 0.217 Uiso 0.217(7) 1 calc PR A 2 
C10 C 0.779(3) 1.270(3) -0.039(4) 0.131(9) Uiso 0.217(7) 1 d P A 2 
H10A H 0.8579 1.3466 -0.0416 0.196 Uiso 0.217(7) 1 calc PR A 2 
H10B H 0.7209 1.2816 0.0143 0.196 Uiso 0.217(7) 1 calc PR A 2 
H10C H 0.7479 1.2466 -0.1305 0.196 Uiso 0.217(7) 1 calc PR A 2 
 
loop_ 
 _atom_site_aniso_label 
 _atom_site_aniso_U_11 
 _atom_site_aniso_U_22 
 _atom_site_aniso_U_33 
 _atom_site_aniso_U_23 
 _atom_site_aniso_U_13 
 _atom_site_aniso_U_12 
Si01 0.0468(4) 0.0500(5) 0.0890(6) 0.0000(6) 0.0000(5) 0.0129(4) 
F1 0.0656(10) 0.0463(8) 0.1069(13) 0.0011(10) 0.0015(13) 0.0339(7) 
C1 0.0506(13) 0.0404(13) 0.0576(16) -0.0005(12) 0.0007(13) 0.0269(11) 
C2 0.0402(13) 0.0418(12) 0.0610(19) -0.0008(13) -0.0011(12) 0.0158(11) 
C3 0.0474(15) 0.0486(16) 0.073(2) 0.0006(15) -0.0014(14) 0.0223(13) 
C4 0.0516(17) 0.0466(15) 0.093(2) -0.0015(18) -0.0004(16) 0.0177(14) 
C5 0.093(4) 0.091(4) 0.117(6) -0.035(3) 0.013(3) 0.012(3) 
C6 0.104(4) 0.100(4) 0.089(5) 0.023(3) 0.002(3) 0.030(3) 
C7 0.057(3) 0.065(3) 0.341(16) -0.001(6) 0.002(5) 0.027(3) 
C8 0.097(16) 0.14(2) 0.10(2) 0.019(16) 0.013(13) -0.011(15) 
C9 0.083(15) 0.12(2) 0.14(3) -0.016(17) 0.005(15) -0.021(13) 
 
_geom_special_details 
; 
 All esds (except the esd in the dihedral angle between two l.s. planes) 
 are estimated using the full covariance matrix.  The cell esds are taken 
 into account individually in the estimation of esds in distances, angles 
 and torsion angles; correlations between esds in cell parameters are only 
 used when they are defined by crystal symmetry.  An approximate (isotropic) 
 treatment of cell esds is used for estimating esds involving l.s. planes. 
; 
 
loop_ 
 _geom_bond_atom_site_label_1 
 _geom_bond_atom_site_label_2 
 _geom_bond_distance 
 _geom_bond_site_symmetry_2 
 _geom_bond_publ_flag 
Si01 C10 1.76(3) . ? 
Si01 C7 1.762(6) . ? 
Si01 C5 1.841(6) . ? 
Si01 C4 1.847(3) . ? 
Si01 C6 1.870(7) . ? 
Si01 C8 1.90(3) . ? 
Si01 C9 2.02(4) . ? 
F1 C1 1.338(3) . ? 
C1 C2 1.379(4) 2_665 ? 
C1 C2 1.403(4) . ? 
C2 C1 1.379(4) 3_565 ? 
C2 C3 1.440(4) . ? 
C3 C4 1.190(4) . ? 
C5 H5A 0.9600 . ? 
C5 H5B 0.9600 . ? 
C5 H5C 0.9600 . ? 
C6 H6A 0.9600 . ? 
C6 H6B 0.9600 . ? 
C6 H6C 0.9600 . ? 
C7 H7A 0.9600 . ? 
C7 H7B 0.9600 . ? 
C7 H7C 0.9600 . ? 
C8 H8A 0.9600 . ? 
C8 H8B 0.9600 . ? 
C8 H8C 0.9600 . ? 
C9 H9A 0.9600 . ? 
C9 H9B 0.9600 . ? 
C9 H9C 0.9600 . ? 
C10 H10A 0.9600 . ? 
C10 H10B 0.9600 . ? 
C10 H10C 0.9600 . ? 
 
loop_ 
 _geom_angle_atom_site_label_1 
 _geom_angle_atom_site_label_2 
 _geom_angle_atom_site_label_3 
 _geom_angle 
 _geom_angle_site_symmetry_1 
 _geom_angle_site_symmetry_3 
 _geom_angle_publ_flag 
C10 Si01 C7 132.5(12) . . ? 
C10 Si01 C5 77.5(13) . . ? 
C7 Si01 C5 112.5(5) . . ? 
C10 Si01 C4 111.1(11) . . ? 
C7 Si01 C4 109.1(2) . . ? 
C5 Si01 C4 108.1(2) . . ? 
C10 Si01 C6 32.0(12) . . ? 
C7 Si01 C6 110.3(5) . . ? 
C5 Si01 C6 108.3(3) . . ? 
C4 Si01 C6 108.5(2) . . ? 
C10 Si01 C8 96.5(18) . . ? 
C7 Si01 C8 50.0(11) . . ? 
C5 Si01 C8 148.4(8) . . ? 
C4 Si01 C8 103.0(8) . . ? 
C6 Si01 C8 65.7(12) . . ? 
C10 Si01 C9 139.6(15) . . ? 
C7 Si01 C9 49.6(11) . . ? 
C5 Si01 C9 69.5(11) . . ? 
C4 Si01 C9 101.0(6) . . ? 
C6 Si01 C9 149.2(7) . . ? 
C8 Si01 C9 99.6(14) . . ? 
F1 C1 C2 119.1(2) . 2_665 ? 
F1 C1 C2 117.0(2) . . ? 
C2 C1 C2 123.9(3) 2_665 . ? 
C1 C2 C1 116.1(3) 3_565 . ? 
C1 C2 C3 121.9(2) 3_565 . ? 
C1 C2 C3 122.0(2) . . ? 
C4 C3 C2 179.0(3) . . ? 
C3 C4 Si01 179.2(3) . . ? 
Si01 C5 H5A 109.5 . . ? 
Si01 C5 H5B 109.5 . . ? 
H5A C5 H5B 109.5 . . ? 
Si01 C5 H5C 109.5 . . ? 
H5A C5 H5C 109.5 . . ? 
H5B C5 H5C 109.5 . . ? 
Si01 C6 H6A 109.5 . . ? 
Si01 C6 H6B 109.5 . . ? 
H6A C6 H6B 109.5 . . ? 
Si01 C6 H6C 109.5 . . ? 
H6A C6 H6C 109.5 . . ? 
H6B C6 H6C 109.5 . . ? 
Si01 C7 H7A 109.5 . . ? 
Si01 C7 H7B 109.5 . . ? 
H7A C7 H7B 109.5 . . ? 
Si01 C7 H7C 109.5 . . ? 
H7A C7 H7C 109.5 . . ? 
H7B C7 H7C 109.5 . . ? 
Si01 C8 H8A 109.5 . . ? 
Si01 C8 H8B 109.5 . . ? 
H8A C8 H8B 109.5 . . ? 
Si01 C8 H8C 109.5 . . ? 
H8A C8 H8C 109.5 . . ? 
H8B C8 H8C 109.5 . . ? 
Si01 C9 H9A 109.5 . . ? 
Si01 C9 H9B 109.5 . . ? 
H9A C9 H9B 109.5 . . ? 
Si01 C9 H9C 109.5 . . ? 
H9A C9 H9C 109.5 . . ? 
H9B C9 H9C 109.5 . . ? 
Si01 C10 H10A 109.5 . . ? 
Si01 C10 H10B 109.5 . . ? 
H10A C10 H10B 109.5 . . ? 
Si01 C10 H10C 109.5 . . ? 
H10A C10 H10C 109.5 . . ? 
H10B C10 H10C 109.5 . . ? 
 
loop_ 
 _geom_torsion_atom_site_label_1 
 _geom_torsion_atom_site_label_2 
 _geom_torsion_atom_site_label_3 
 _geom_torsion_atom_site_label_4 
 _geom_torsion 
 _geom_torsion_site_symmetry_1 
 _geom_torsion_site_symmetry_2 
 _geom_torsion_site_symmetry_3 
 _geom_torsion_site_symmetry_4 
 _geom_torsion_publ_flag 
F1 C1 C2 C1 179.84(18) . . . 3_565 ? 
C2 C1 C2 C1 -0.1(5) 2_665 . . 3_565 ? 
F1 C1 C2 C3 0.1(4) . . . . ? 
C2 C1 C2 C3 -179.8(2) 2_665 . . . ? 
C1 C2 C3 C4 0(19) 3_565 . . . ? 
C1 C2 C3 C4 180(100) . . . . ? 
C2 C3 C4 Si01 31(39) . . . . ? 
C10 Si01 C4 C3 123(24) . . . . ? 
C7 Si01 C4 C3 -31(24) . . . . ? 
C5 Si01 C4 C3 -154(24) . . . . ? 
C6 Si01 C4 C3 89(24) . . . . ? 
C8 Si01 C4 C3 21(24) . . . . ? 
C9 Si01 C4 C3 -82(24) . . . . ? 
 
_diffrn_measured_fraction_theta_max    0.996 
_diffrn_reflns_theta_full              27.50 
_diffrn_measured_fraction_theta_full   0.996 
_refine_diff_density_max    0.205 
_refine_diff_density_min   -0.191 
_refine_diff_density_rms    0.035 

#===END


data_mol1 
 
_audit_creation_method            SHELXL-97 
_chemical_name_systematic 
; 
 ? 
; 
_chemical_name_common             ? 
_chemical_melting_point           ? 
_chemical_formula_moiety          
'C12 F3 I3'  
_chemical_formula_sum 
 'C12 F3 I3' 
_chemical_formula_weight          581.82 
 
loop_ 
 _atom_type_symbol 
 _atom_type_description 
 _atom_type_scat_dispersion_real 
 _atom_type_scat_dispersion_imag 
 _atom_type_scat_source 
 'C'  'C'   0.0033   0.0016 
 'International Tables Vol C Tables 4.2.6.8 and 6.1.1.4' 
 'F'  'F'   0.0171   0.0103 
 'International Tables Vol C Tables 4.2.6.8 and 6.1.1.4' 
 'I'  'I'  -0.4742   1.8119 
 'International Tables Vol C Tables 4.2.6.8 and 6.1.1.4' 
 
_symmetry_cell_setting            triclinic
_symmetry_space_group_name_H-M    'P -1' 
_symmetry_space_group_name_Hall   '-P 1'
 
loop_ 
 _symmetry_equiv_pos_as_xyz 
 'x, y, z' 
 '-x, -y, -z' 
 
_cell_length_a                    4.5919(3) 
_cell_length_b                    9.1244(6) 
_cell_length_c                    17.0661(12) 
_cell_angle_alpha                 89.153(4) 
_cell_angle_beta                  87.442(3) 
_cell_angle_gamma                 76.337(4) 
_cell_volume                      694.11(8) 
_cell_formula_units_Z             2 
_cell_measurement_temperature     150(2) 
_cell_measurement_reflns_used            5830
_cell_measurement_theta_min              2.59
_cell_measurement_theta_max             27.42
 
_exptl_crystal_description        prism
_exptl_crystal_colour             colorless 
_exptl_crystal_size_max           0.34 
_exptl_crystal_size_mid           0.25 
_exptl_crystal_size_min           0.11 
_exptl_crystal_density_meas       ? 
_exptl_crystal_density_diffrn     2.784 
_exptl_crystal_density_method     'not measured' 
_exptl_crystal_F_000              516 
_exptl_absorpt_coefficient_mu     6.766 
_exptl_absorpt_correction_type                              multi-scan
_exptl_absorpt_process_details
;
  [Sheldrick, G.M. (2002). SADABS Bruker AXS Inc., Madison, Wisconsin, USA]
;
_exptl_absorpt_correction_T_min                      0.143
_exptl_absorpt_correction_T_max                      0.475

#----------------------------- Remark ------------------------------------#
# SADABS output:                                                          #
# Estimated minimum and maximum transmission:  0.5591  0.7456             #
# The ratio of these values is more reliable than their absolute values!  #
#-------------------------------------------------------------------------#
 
_diffrn_measurement_device_type         'APEXII, Bruker-AXS'
_diffrn_measurement_method              'CCD rotation images, thin slices'
_diffrn_detector                        'CCD plate'
_diffrn_ambient_temperature             150(2)
_diffrn_radiation_wavelength            0.71073
_diffrn_radiation_type                  MoK\a
_diffrn_radiation_monochromator         graphite
_diffrn_radiation_probe                 x-ray
_diffrn_standards_number          ? 
_diffrn_standards_interval_count  ? 
_diffrn_standards_interval_time   ? 
_diffrn_standards_decay_%         ? 
_diffrn_reflns_number             10672 
_diffrn_reflns_av_R_equivalents   0.0295 
_diffrn_reflns_av_sigmaI/netI     0.0280 
_diffrn_reflns_limit_h_min        -5 
_diffrn_reflns_limit_h_max        5 
_diffrn_reflns_limit_k_min        -11 
_diffrn_reflns_limit_k_max        11 
_diffrn_reflns_limit_l_min        -22 
_diffrn_reflns_limit_l_max        22 
_diffrn_reflns_theta_min          1.19 
_diffrn_reflns_theta_max          27.43 
_reflns_number_total              3082 
_reflns_number_gt                 2759 
_reflns_threshold_expression      >2sigma(I) 
 
_computing_data_collection              'Bruker SAINT (Bruker, 2002)'
_computing_cell_refinement              'Bruker SMART (Bruker, 2002)'
_computing_data_reduction               'Bruker SAINT (Bruker, 2002)'
_computing_structure_solution           'SIR97 (ALtomare et al., 1999))'
_computing_structure_refinement         'SHELXL-97 (Sheldrick, 1997)'
_computing_molecular_graphics           'Ortep-3 for Windows (Farrugia, 1997)'
_computing_publication_material  'WinGX publication routines (Farrugia, 1999)'

 
_refine_special_details 
; 
 Refinement of F^2^ against ALL reflections.  The weighted R-factor wR and 
 goodness of fit S are based on F^2^, conventional R-factors R are based 
 on F, with F set to zero for negative F^2^. The threshold expression of 
 F^2^ > 2sigma(F^2^) is used only for calculating R-factors(gt) etc. and is 
 not relevant to the choice of reflections for refinement.  R-factors based 
 on F^2^ are statistically about twice as large as those based on F, and R- 
 factors based on ALL data will be even larger. 
; 
 
_refine_ls_structure_factor_coef  Fsqd  
_refine_ls_matrix_type            full 
_refine_ls_weighting_scheme       calc  
_refine_ls_weighting_details 
 'calc w=1/[\s^2^(Fo^2^)+(0.0000P)^2^+1.3887P] where P=(Fo^2^+2Fc^2^)/3' 
_atom_sites_solution_primary      direct 
_atom_sites_solution_secondary    difmap 
_atom_sites_solution_hydrogens    none 
_refine_ls_hydrogen_treatment     none 
_refine_ls_extinction_method      none 
_refine_ls_extinction_coef        ? 
_refine_ls_number_reflns          3082 
_refine_ls_number_parameters      163 
_refine_ls_number_restraints      0 
_refine_ls_R_factor_all           0.0251 
_refine_ls_R_factor_gt            0.0210 
_refine_ls_wR_factor_ref          0.0482 
_refine_ls_wR_factor_gt           0.0403 
_refine_ls_goodness_of_fit_ref    1.124 
_refine_ls_restrained_S_all       1.124 
_refine_ls_shift/su_max           0.004 
_refine_ls_shift/su_mean          0.000 
 
loop_ 
 _atom_site_label 
 _atom_site_type_symbol 
 _atom_site_fract_x 
 _atom_site_fract_y 
 _atom_site_fract_z 
 _atom_site_U_iso_or_equiv 
 _atom_site_adp_type 
 _atom_site_occupancy 
 _atom_site_symmetry_multiplicity 
 _atom_site_calc_flag 
 _atom_site_refinement_flags 
 _atom_site_disorder_assembly 
 _atom_site_disorder_group 
C1 C 0.2581(8) 0.4873(4) 0.6683(2) 0.0224(7) Uani 1 1 d . . . 
C2 C 0.4997(8) 0.3659(4) 0.6505(2) 0.0215(7) Uani 1 1 d . . . 
C3 C 0.6911(7) 0.3151(4) 0.7111(2) 0.0224(7) Uani 1 1 d . . . 
C4 C 0.6556(8) 0.3768(4) 0.7858(2) 0.0222(7) Uani 1 1 d . . . 
C5 C 0.4111(8) 0.5001(4) 0.79816(19) 0.0212(7) Uani 1 1 d . . . 
C6 C 0.2061(8) 0.5586(4) 0.7410(2) 0.0225(7) Uani 1 1 d . . . 
C7 C 0.5494(8) 0.2959(4) 0.5751(2) 0.0266(8) Uani 1 1 d . . . 
C8 C 0.6015(8) 0.2319(4) 0.5141(2) 0.0271(8) Uani 1 1 d . . . 
C9 C 0.8502(8) 0.3219(4) 0.8482(2) 0.0252(8) Uani 1 1 d . . . 
C10 C 0.9959(8) 0.2843(4) 0.9049(2) 0.0274(8) Uani 1 1 d . . . 
C11 C -0.0387(8) 0.6856(4) 0.7579(2) 0.0247(8) Uani 1 1 d . . . 
C12 C -0.2375(8) 0.7917(4) 0.7752(2) 0.0244(8) Uani 1 1 d . . . 
F1 F 0.0627(4) 0.5380(2) 0.61269(12) 0.0290(5) Uani 1 1 d . . . 
F2 F 0.9280(4) 0.1983(2) 0.69678(12) 0.0308(5) Uani 1 1 d . . . 
F3 F 0.3695(5) 0.5651(2) 0.86905(12) 0.0295(5) Uani 1 1 d . . . 
I1 I 0.69117(6) 0.11916(3) 0.413350(14) 0.03438(8) Uani 1 1 d . . . 
I2 I 1.21360(6) 0.22961(4) 1.003632(15) 0.04480(9) Uani 1 1 d . . . 
I3 I -0.55665(5) 0.97475(3) 0.804617(14) 0.02772(7) Uani 1 1 d . . . 
 
loop_ 
 _atom_site_aniso_label 
 _atom_site_aniso_U_11 
 _atom_site_aniso_U_22 
 _atom_site_aniso_U_33 
 _atom_site_aniso_U_23 
 _atom_site_aniso_U_13 
 _atom_site_aniso_U_12 
C1 0.0218(17) 0.0240(18) 0.0216(18) 0.0032(14) -0.0041(14) -0.0058(14) 
C2 0.0242(17) 0.0195(17) 0.0205(17) -0.0012(14) -0.0001(13) -0.0045(14) 
C3 0.0202(17) 0.0190(17) 0.0255(18) -0.0018(14) 0.0018(14) -0.0002(14) 
C4 0.0209(17) 0.0233(18) 0.0222(18) 0.0014(14) -0.0031(13) -0.0046(14) 
C5 0.0231(17) 0.0219(18) 0.0179(17) -0.0029(14) 0.0018(13) -0.0039(14) 
C6 0.0224(17) 0.0196(17) 0.0253(18) -0.0015(14) 0.0003(14) -0.0049(14) 
C7 0.0297(19) 0.0247(19) 0.0244(19) 0.0010(15) -0.0023(15) -0.0043(15) 
C8 0.0295(19) 0.027(2) 0.0235(19) -0.0017(15) -0.0020(15) -0.0030(16) 
C9 0.0241(18) 0.0243(19) 0.0240(19) -0.0026(15) 0.0013(15) 0.0003(15) 
C10 0.0260(19) 0.030(2) 0.0226(18) -0.0018(15) -0.0003(15) 0.0013(16) 
C11 0.0242(18) 0.0266(19) 0.0223(18) -0.0002(15) -0.0019(14) -0.0040(15) 
C12 0.0239(18) 0.0230(18) 0.0236(18) -0.0022(15) -0.0050(14) 0.0007(15) 
F1 0.0296(11) 0.0281(11) 0.0268(11) -0.0004(9) -0.0098(9) -0.0002(9) 
F2 0.0266(11) 0.0298(12) 0.0292(12) -0.0040(9) 0.0006(9) 0.0065(9) 
F3 0.0317(11) 0.0317(12) 0.0206(11) -0.0061(9) -0.0013(8) 0.0017(9) 
I1 0.04962(17) 0.03372(15) 0.02042(13) -0.00642(10) 0.00299(11) -0.01153(12) 
I2 0.03690(16) 0.0665(2) 0.02099(13) -0.00279(13) -0.00723(11) 0.00902(14) 
I3 0.02538(13) 0.02382(13) 0.02946(13) -0.00458(10) -0.00249(9) 0.00371(9) 
 
_geom_special_details 
; 
 All esds (except the esd in the dihedral angle between two l.s. planes) 
 are estimated using the full covariance matrix.  The cell esds are taken 
 into account individually in the estimation of esds in distances, angles 
 and torsion angles; correlations between esds in cell parameters are only 
 used when they are defined by crystal symmetry.  An approximate (isotropic) 
 treatment of cell esds is used for estimating esds involving l.s. planes. 
; 
 
loop_ 
 _geom_bond_atom_site_label_1 
 _geom_bond_atom_site_label_2 
 _geom_bond_distance 
 _geom_bond_site_symmetry_2 
 _geom_bond_publ_flag 
C1 F1 1.337(4) . ? 
C1 C6 1.395(5) . ? 
C1 C2 1.396(5) . ? 
C2 C3 1.390(5) . ? 
C2 C7 1.431(5) . ? 
C3 F2 1.347(4) . ? 
C3 C4 1.389(5) . ? 
C4 C5 1.400(5) . ? 
C4 C9 1.428(5) . ? 
C5 F3 1.341(4) . ? 
C5 C6 1.397(5) . ? 
C6 C11 1.434(5) . ? 
C7 C8 1.187(5) . ? 
C8 I1 1.993(4) . ? 
C9 C10 1.200(5) . ? 
C10 I2 1.994(4) . ? 
C11 C12 1.193(5) . ? 
C12 I3 1.998(3) . ? 
 
loop_ 
 _geom_angle_atom_site_label_1 
 _geom_angle_atom_site_label_2 
 _geom_angle_atom_site_label_3 
 _geom_angle 
 _geom_angle_site_symmetry_1 
 _geom_angle_site_symmetry_3 
 _geom_angle_publ_flag 
F1 C1 C6 117.7(3) . . ? 
F1 C1 C2 118.3(3) . . ? 
C6 C1 C2 124.0(3) . . ? 
C3 C2 C1 115.9(3) . . ? 
C3 C2 C7 121.3(3) . . ? 
C1 C2 C7 122.8(3) . . ? 
F2 C3 C4 117.5(3) . . ? 
F2 C3 C2 118.1(3) . . ? 
C4 C3 C2 124.5(3) . . ? 
C3 C4 C5 115.9(3) . . ? 
C3 C4 C9 124.0(3) . . ? 
C5 C4 C9 120.1(3) . . ? 
F3 C5 C6 118.1(3) . . ? 
F3 C5 C4 118.2(3) . . ? 
C6 C5 C4 123.7(3) . . ? 
C1 C6 C5 116.0(3) . . ? 
C1 C6 C11 123.4(3) . . ? 
C5 C6 C11 120.6(3) . . ? 
C8 C7 C2 176.6(4) . . ? 
C7 C8 I1 178.4(3) . . ? 
C10 C9 C4 174.2(4) . . ? 
C9 C10 I2 176.0(3) . . ? 
C12 C11 C6 177.1(4) . . ? 
C11 C12 I3 177.5(3) . . ? 
 
loop_ 
 _geom_torsion_atom_site_label_1 
 _geom_torsion_atom_site_label_2 
 _geom_torsion_atom_site_label_3 
 _geom_torsion_atom_site_label_4 
 _geom_torsion 
 _geom_torsion_site_symmetry_1 
 _geom_torsion_site_symmetry_2 
 _geom_torsion_site_symmetry_3 
 _geom_torsion_site_symmetry_4 
 _geom_torsion_publ_flag 
F1 C1 C2 C3 -178.3(3) . . . . ? 
C6 C1 C2 C3 1.2(5) . . . . ? 
F1 C1 C2 C7 1.2(5) . . . . ? 
C6 C1 C2 C7 -179.3(3) . . . . ? 
C1 C2 C3 F2 -179.9(3) . . . . ? 
C7 C2 C3 F2 0.6(5) . . . . ? 
C1 C2 C3 C4 0.0(5) . . . . ? 
C7 C2 C3 C4 -179.5(3) . . . . ? 
F2 C3 C4 C5 178.6(3) . . . . ? 
C2 C3 C4 C5 -1.2(5) . . . . ? 
F2 C3 C4 C9 -1.5(5) . . . . ? 
C2 C3 C4 C9 178.7(3) . . . . ? 
C3 C4 C5 F3 -179.1(3) . . . . ? 
C9 C4 C5 F3 1.0(5) . . . . ? 
C3 C4 C5 C6 1.5(5) . . . . ? 
C9 C4 C5 C6 -178.4(3) . . . . ? 
F1 C1 C6 C5 178.5(3) . . . . ? 
C2 C1 C6 C5 -1.0(5) . . . . ? 
F1 C1 C6 C11 -2.2(5) . . . . ? 
C2 C1 C6 C11 178.4(3) . . . . ? 
F3 C5 C6 C1 -179.9(3) . . . . ? 
C4 C5 C6 C1 -0.5(5) . . . . ? 
F3 C5 C6 C11 0.8(5) . . . . ? 
C4 C5 C6 C11 -179.8(3) . . . . ? 
C3 C2 C7 C8 11(7) . . . . ? 
C1 C2 C7 C8 -169(7) . . . . ? 
C2 C7 C8 I1 33(18) . . . . ? 
C3 C4 C9 C10 -172(4) . . . . ? 
C5 C4 C9 C10 8(4) . . . . ? 
C4 C9 C10 I2 11(9) . . . . ? 
C1 C6 C11 C12 -175(8) . . . . ? 
C5 C6 C11 C12 4(8) . . . . ? 
C6 C11 C12 I3 62(12) . . . . ? 
 
_diffrn_measured_fraction_theta_max    0.979 
_diffrn_reflns_theta_full              27.43 
_diffrn_measured_fraction_theta_full   0.979 
_refine_diff_density_max    0.650 
_refine_diff_density_min   -0.516 
_refine_diff_density_rms    0.116 

#===END


data_Mol1-DMSO 
 
_audit_creation_method            SHELXL-97 
_chemical_name_systematic 
; 
 ? 
; 
_chemical_name_common             ? 
_chemical_melting_point           ? 
_chemical_formula_moiety          
'C12 F3 I3, C2 H6 O S'
_chemical_formula_sum 
 'C14 H6 F3 I3 O S ' 

_chemical_formula_weight          659.95 
 
loop_ 
 _atom_type_symbol 
 _atom_type_description 
 _atom_type_scat_dispersion_real 
 _atom_type_scat_dispersion_imag 
 _atom_type_scat_source 
 'C'  'C'   0.0033   0.0016 
 'International Tables Vol C Tables 4.2.6.8 and 6.1.1.4' 
 'H'  'H'   0.0000   0.0000 
 'International Tables Vol C Tables 4.2.6.8 and 6.1.1.4' 
 'O'  'O'   0.0106   0.0060 
 'International Tables Vol C Tables 4.2.6.8 and 6.1.1.4' 
 'F'  'F'   0.0171   0.0103 
 'International Tables Vol C Tables 4.2.6.8 and 6.1.1.4' 
 'S'  'S'   0.1246   0.1234 
 'International Tables Vol C Tables 4.2.6.8 and 6.1.1.4' 
 'I'  'I'  -0.4742   1.8119 
 'International Tables Vol C Tables 4.2.6.8 and 6.1.1.4' 
 
_symmetry_cell_setting            orthorhombic
_symmetry_space_group_name_H-M    'P n m a' 
_symmetry_space_group_name_Hall   '-P 2ac 2n'

 
loop_ 
 _symmetry_equiv_pos_as_xyz 
 'x, y, z' 
 '-x+1/2, -y, z+1/2' 
 'x+1/2, -y+1/2, -z+1/2' 
 '-x, y+1/2, -z' 
 '-x, -y, -z' 
 'x-1/2, y, -z-1/2' 
 '-x-1/2, y-1/2, z-1/2' 
 'x, -y-1/2, z' 
 
_cell_length_a                    14.0574(11) 
_cell_length_b                    7.2070(6) 
_cell_length_c                    18.6836(14) 
_cell_angle_alpha                 90.00 
_cell_angle_beta                  90.00 
_cell_angle_gamma                 90.00 
_cell_volume                      1892.9(3) 
_cell_formula_units_Z             4 
_cell_measurement_temperature     150(2) 
_cell_measurement_reflns_used            9942
_cell_measurement_theta_min              2.62
_cell_measurement_theta_max             27.36

 
_exptl_crystal_description        prism 
_exptl_crystal_colour             colorless 
_exptl_crystal_size_max           0.45 
_exptl_crystal_size_mid           0.25 
_exptl_crystal_size_min           0.12 
_exptl_crystal_density_meas       ? 
_exptl_crystal_density_diffrn     2.316 
_exptl_crystal_density_method     'not measured' 
_exptl_crystal_F_000              1200 
_exptl_absorpt_coefficient_mu     5.087 
_exptl_absorpt_correction_type                              multi-scan
_exptl_absorpt_process_details
;
  [Sheldrick, G.M. (2002). SADABS Bruker AXS Inc., Madison, Wisconsin, USA]
;
_exptl_absorpt_correction_T_min                      0.237
_exptl_absorpt_correction_T_max                      0.543

#----------------------------- Remark ------------------------------------#
# SADABS output:                                                          #
# Estimated minimum and maximum transmission:  0.3616  0.7456             #
# The ratio of these values is more reliable than their absolute values!  #
#-------------------------------------------------------------------------#

 
_diffrn_measurement_device_type         'APEXII, Bruker-AXS'
_diffrn_measurement_method              'CCD rotation images, thin slices'
_diffrn_detector                        'CCD plate'
_diffrn_ambient_temperature             150(2)
_diffrn_radiation_wavelength            0.71073
_diffrn_radiation_type                  MoK\a
_diffrn_radiation_monochromator         graphite
_diffrn_radiation_probe                 x-ray
_diffrn_detector_area_resol_mean  ? 
_diffrn_standards_number          ? 
_diffrn_standards_interval_count  ? 
_diffrn_standards_interval_time   ? 
_diffrn_standards_decay_%         ? 
_diffrn_reflns_number             27788 
_diffrn_reflns_av_R_equivalents   0.0458 
_diffrn_reflns_av_sigmaI/netI     0.0212 
_diffrn_reflns_limit_h_min        -17 
_diffrn_reflns_limit_h_max        18 
_diffrn_reflns_limit_k_min        -9 
_diffrn_reflns_limit_k_max        9 
_diffrn_reflns_limit_l_min        -24 
_diffrn_reflns_limit_l_max        24 
_diffrn_reflns_theta_min          1.81 
_diffrn_reflns_theta_max          27.54 
_reflns_number_total              2344 
_reflns_number_gt                 2177 
_reflns_threshold_expression      >2sigma(I) 
 
_computing_data_collection              'Bruker SAINT (Bruker, 2002)'
_computing_cell_refinement              'Bruker SMART (Bruker, 2002)'
_computing_data_reduction               'Bruker SAINT (Bruker, 2002)'
_computing_structure_solution           'SIR97 (ALtomare et al., 1999))'
_computing_structure_refinement         'SHELXL-97 (Sheldrick, 1997)'
_computing_molecular_graphics           'Ortep-3 for Windows (Farrugia, 1997)'
_computing_publication_material  'WinGX publication routines (Farrugia, 1999)'

_refine_special_details 
; 
 Refinement of F^2^ against ALL reflections.  The weighted R-factor wR and 
 goodness of fit S are based on F^2^, conventional R-factors R are based 
 on F, with F set to zero for negative F^2^. The threshold expression of 
 F^2^ > 2sigma(F^2^) is used only for calculating R-factors(gt) etc. and is 
 not relevant to the choice of reflections for refinement.  R-factors based 
 on F^2^ are statistically about twice as large as those based on F, and R- 
 factors based on ALL data will be even larger. 
; 
 
_refine_ls_structure_factor_coef  Fsqd  
_refine_ls_matrix_type            full 
_refine_ls_weighting_scheme       calc  
_refine_ls_weighting_details 
 'calc w=1/[\s^2^(Fo^2^)+(0.0348P)^2^+4.0861P] where P=(Fo^2^+2Fc^2^)/3' 
_atom_sites_solution_primary      direct 
_atom_sites_solution_secondary    difmap 
_atom_sites_solution_hydrogens    geom 
_refine_ls_hydrogen_treatment     constr 
_refine_ls_extinction_method      none 
_refine_ls_extinction_coef        ? 
_refine_ls_number_reflns          2344 
_refine_ls_number_parameters      131 
_refine_ls_number_restraints      0 
_refine_ls_R_factor_all           0.0273 
_refine_ls_R_factor_gt            0.0239 
_refine_ls_wR_factor_ref          0.0789 
_refine_ls_wR_factor_gt           0.0633 
_refine_ls_goodness_of_fit_ref    1.213 
_refine_ls_restrained_S_all       1.213 
_refine_ls_shift/su_max           0.001 
_refine_ls_shift/su_mean          0.000 
 
loop_ 
 _atom_site_label 
 _atom_site_type_symbol 
 _atom_site_fract_x 
 _atom_site_fract_y 
 _atom_site_fract_z 
 _atom_site_U_iso_or_equiv 
 _atom_site_adp_type 
 _atom_site_occupancy 
 _atom_site_symmetry_multiplicity 
 _atom_site_calc_flag 
 _atom_site_refinement_flags 
 _atom_site_disorder_assembly 
 _atom_site_disorder_group 
C1 C 0.2184(4) 0.7500 0.5509(3) 0.0206(9) Uani 1 2 d S . . 
C2 C 0.2252(4) 0.7500 0.6254(3) 0.0209(9) Uani 1 2 d S . . 
C3 C 0.3118(4) 0.7500 0.6620(3) 0.0209(10) Uani 1 2 d S . . 
C4 C 0.3937(4) 0.7500 0.6199(3) 0.0248(10) Uani 1 2 d S . . 
C5 C 0.3933(4) 0.7500 0.5454(3) 0.0223(10) Uani 1 2 d S . . 
C6 C 0.3042(4) 0.7500 0.5138(3) 0.0236(10) Uani 1 2 d S . . 
C7 C 0.1298(4) 0.7500 0.5123(3) 0.0240(10) Uani 1 2 d S . . 
C8 C 0.0624(4) 0.7500 0.4742(3) 0.0281(11) Uani 1 2 d S . . 
C9 C 0.3173(4) 0.7500 0.7391(3) 0.0266(11) Uani 1 2 d S . . 
C10 C 0.3227(4) 0.7500 0.8022(3) 0.0317(12) Uani 1 2 d S . . 
C11 C 0.4780(4) 0.7500 0.5027(3) 0.0273(11) Uani 1 2 d S . . 
C12 C 0.5462(4) 0.7500 0.4645(3) 0.0256(10) Uani 1 2 d S . . 
C14 C 0.1075(3) 0.4361(6) 0.7987(2) 0.0355(9) Uani 1 1 d . . . 
H14A H 0.1367 0.5522 0.7865 0.053 Uiso 1 1 calc R . . 
H14B H 0.0947 0.4331 0.8492 0.053 Uiso 1 1 calc R . . 
H14C H 0.0489 0.4228 0.7728 0.053 Uiso 1 1 calc R . . 
O1 O 0.1922(3) 0.2500 0.6947(2) 0.0402(11) Uani 1 2 d S . . 
F1 F 0.1448(2) 0.7500 0.66352(15) 0.0265(6) Uani 1 2 d S . . 
F2 F 0.4780(2) 0.7500 0.65340(18) 0.0327(7) Uani 1 2 d S . . 
F3 F 0.2996(2) 0.7500 0.44154(16) 0.0341(8) Uani 1 2 d S . . 
S1 S 0.18585(9) 0.2500 0.77584(7) 0.0283(3) Uani 1 2 d S . . 
I1 I -0.04601(3) 0.7500 0.403486(16) 0.02843(12) Uani 1 2 d S . . 
I2 I 0.33282(4) 0.7500 0.90909(2) 0.05256(16) Uani 1 2 d S . . 
I3 I 0.65691(2) 0.7500 0.395886(18) 0.02330(11) Uani 1 2 d S . . 
 
loop_ 
 _atom_site_aniso_label 
 _atom_site_aniso_U_11 
 _atom_site_aniso_U_22 
 _atom_site_aniso_U_33 
 _atom_site_aniso_U_23 
 _atom_site_aniso_U_13 
 _atom_site_aniso_U_12 
C1 0.022(2) 0.022(2) 0.018(2) 0.000 -0.0017(19) 0.000 
C2 0.020(2) 0.024(2) 0.019(2) 0.000 0.0027(18) 0.000 
C3 0.021(2) 0.023(2) 0.018(2) 0.000 -0.0011(18) 0.000 
C4 0.020(2) 0.021(2) 0.034(3) 0.000 -0.005(2) 0.000 
C5 0.019(2) 0.022(2) 0.027(2) 0.000 0.0054(19) 0.000 
C6 0.031(3) 0.025(2) 0.015(2) 0.000 0.0025(19) 0.000 
C7 0.024(2) 0.031(3) 0.017(2) 0.000 0.0013(19) 0.000 
C8 0.028(3) 0.038(3) 0.019(2) 0.000 0.001(2) 0.000 
C9 0.027(3) 0.026(2) 0.027(3) 0.000 -0.004(2) 0.000 
C10 0.035(3) 0.036(3) 0.023(3) 0.000 -0.007(2) 0.000 
C11 0.027(3) 0.023(2) 0.032(3) 0.000 0.005(2) 0.000 
C12 0.020(2) 0.022(2) 0.034(3) 0.000 0.004(2) 0.000 
C14 0.039(2) 0.036(2) 0.0319(19) 0.0032(17) 0.0031(17) 0.0008(18) 
O1 0.024(2) 0.080(3) 0.0167(18) 0.000 0.0036(15) 0.000 
F1 0.0225(15) 0.0390(17) 0.0180(14) 0.000 0.0045(11) 0.000 
F2 0.0203(15) 0.0389(17) 0.0388(18) 0.000 -0.0072(13) 0.000 
F3 0.0355(19) 0.053(2) 0.0139(14) 0.000 0.0046(12) 0.000 
S1 0.0181(6) 0.0490(8) 0.0178(6) 0.000 0.0006(5) 0.000 
I1 0.02281(19) 0.0448(2) 0.01773(17) 0.000 -0.00279(11) 0.000 
I2 0.0772(4) 0.0611(3) 0.0194(2) 0.000 -0.01429(18) 0.000 
I3 0.02012(18) 0.02040(17) 0.02937(18) 0.000 0.00728(12) 0.000 
 
_geom_special_details 
; 
 All esds (except the esd in the dihedral angle between two l.s. planes) 
 are estimated using the full covariance matrix.  The cell esds are taken 
 into account individually in the estimation of esds in distances, angles 
 and torsion angles; correlations between esds in cell parameters are only 
 used when they are defined by crystal symmetry.  An approximate (isotropic) 
 treatment of cell esds is used for estimating esds involving l.s. planes. 
; 
 
loop_ 
 _geom_bond_atom_site_label_1 
 _geom_bond_atom_site_label_2 
 _geom_bond_distance 
 _geom_bond_site_symmetry_2 
 _geom_bond_publ_flag 
C1 C6 1.391(7) . ? 
C1 C2 1.395(7) . ? 
C1 C7 1.439(7) . ? 
C2 F1 1.337(6) . ? 
C2 C3 1.396(7) . ? 
C3 C4 1.394(7) . ? 
C3 C9 1.442(7) . ? 
C4 F2 1.340(6) . ? 
C4 C5 1.393(7) . ? 
C5 C6 1.385(7) . ? 
C5 C11 1.433(7) . ? 
C6 F3 1.351(6) . ? 
C7 C8 1.186(8) . ? 
C8 I1 2.016(5) . ? 
C9 C10 1.182(8) . ? 
C10 I2 2.003(6) . ? 
C11 C12 1.195(7) . ? 
C12 I3 2.016(5) . ? 
C14 S1 1.788(4) . ? 
C14 H14A 0.9600 . ? 
C14 H14B 0.9600 . ? 
C14 H14C 0.9600 . ? 
O1 S1 1.518(4) . ? 
S1 C14 1.788(4) 8_565 ? 
 
loop_ 
 _geom_angle_atom_site_label_1 
 _geom_angle_atom_site_label_2 
 _geom_angle_atom_site_label_3 
 _geom_angle 
 _geom_angle_site_symmetry_1 
 _geom_angle_site_symmetry_3 
 _geom_angle_publ_flag 
C6 C1 C2 116.0(4) . . ? 
C6 C1 C7 120.0(4) . . ? 
C2 C1 C7 124.0(4) . . ? 
F1 C2 C1 118.3(4) . . ? 
F1 C2 C3 118.4(4) . . ? 
C1 C2 C3 123.3(4) . . ? 
C4 C3 C2 116.4(4) . . ? 
C4 C3 C9 121.2(5) . . ? 
C2 C3 C9 122.4(5) . . ? 
F2 C4 C5 118.1(5) . . ? 
F2 C4 C3 117.9(5) . . ? 
C5 C4 C3 124.1(5) . . ? 
C6 C5 C4 115.5(4) . . ? 
C6 C5 C11 121.0(5) . . ? 
C4 C5 C11 123.6(5) . . ? 
F3 C6 C5 118.0(4) . . ? 
F3 C6 C1 117.2(4) . . ? 
C5 C6 C1 124.9(5) . . ? 
C8 C7 C1 173.1(5) . . ? 
C7 C8 I1 176.0(5) . . ? 
C10 C9 C3 179.4(6) . . ? 
C9 C10 I2 179.6(5) . . ? 
C12 C11 C5 177.1(6) . . ? 
C11 C12 I3 177.2(5) . . ? 
S1 C14 H14A 109.5 . . ? 
S1 C14 H14B 109.5 . . ? 
H14A C14 H14B 109.5 . . ? 
S1 C14 H14C 109.5 . . ? 
H14A C14 H14C 109.5 . . ? 
H14B C14 H14C 109.5 . . ? 
O1 S1 C14 105.98(17) . 8_565 ? 
O1 S1 C14 105.98(17) . . ? 
C14 S1 C14 97.2(3) 8_565 . ? 
 
loop_ 
 _geom_torsion_atom_site_label_1 
 _geom_torsion_atom_site_label_2 
 _geom_torsion_atom_site_label_3 
 _geom_torsion_atom_site_label_4 
 _geom_torsion 
 _geom_torsion_site_symmetry_1 
 _geom_torsion_site_symmetry_2 
 _geom_torsion_site_symmetry_3 
 _geom_torsion_site_symmetry_4 
 _geom_torsion_publ_flag 
C6 C1 C2 F1 180.0 . . . . ? 
C7 C1 C2 F1 0.000(1) . . . . ? 
C6 C1 C2 C3 0.000(1) . . . . ? 
C7 C1 C2 C3 180.000(1) . . . . ? 
F1 C2 C3 C4 180.000(1) . . . . ? 
C1 C2 C3 C4 0.000(1) . . . . ? 
F1 C2 C3 C9 0.000(2) . . . . ? 
C1 C2 C3 C9 180.000(1) . . . . ? 
C2 C3 C4 F2 180.0 . . . . ? 
C9 C3 C4 F2 0.000(1) . . . . ? 
C2 C3 C4 C5 0.000(2) . . . . ? 
C9 C3 C4 C5 180.000(1) . . . . ? 
F2 C4 C5 C6 180.000(1) . . . . ? 
C3 C4 C5 C6 0.000(1) . . . . ? 
F2 C4 C5 C11 0.000(1) . . . . ? 
C3 C4 C5 C11 180.000(1) . . . . ? 
C4 C5 C6 F3 180.0 . . . . ? 
C11 C5 C6 F3 0.000(1) . . . . ? 
C4 C5 C6 C1 0.000(1) . . . . ? 
C11 C5 C6 C1 180.000(1) . . . . ? 
C2 C1 C6 F3 180.0 . . . . ? 
C7 C1 C6 F3 0.000(1) . . . . ? 
C2 C1 C6 C5 0.000(1) . . . . ? 
C7 C1 C6 C5 180.000(1) . . . . ? 
 
_diffrn_measured_fraction_theta_max    0.994 
_diffrn_reflns_theta_full              27.54 
_diffrn_measured_fraction_theta_full   0.994 
_refine_diff_density_max    1.582 
_refine_diff_density_min   -1.684 
_refine_diff_density_rms    0.136 

#===END


data_1-Et3SI 
 
_audit_creation_method            SHELXL-97 
_chemical_name_systematic 
; 
 ? 
; 
_chemical_name_common             ? 
_chemical_melting_point           ? 
_chemical_formula_moiety          
'C12 F3 I3, C6 H15 S, C H Cl3, I'
_chemical_formula_sum 
 'C19 H16 Cl3 F3 I4 S' 
_chemical_formula_weight          947.33 
 
loop_ 
 _atom_type_symbol 
 _atom_type_description 
 _atom_type_scat_dispersion_real 
 _atom_type_scat_dispersion_imag 
 _atom_type_scat_source 
 'C'  'C'   0.0033   0.0016 
 'International Tables Vol C Tables 4.2.6.8 and 6.1.1.4' 
 'H'  'H'   0.0000   0.0000 
 'International Tables Vol C Tables 4.2.6.8 and 6.1.1.4' 
 'F'  'F'   0.0171   0.0103 
 'International Tables Vol C Tables 4.2.6.8 and 6.1.1.4' 
 'S'  'S'   0.1246   0.1234 
 'International Tables Vol C Tables 4.2.6.8 and 6.1.1.4' 
 'I'  'I'  -0.4742   1.8119 
 'International Tables Vol C Tables 4.2.6.8 and 6.1.1.4' 
 'Cl'  'Cl'   0.1484   0.1585 
 'International Tables Vol C Tables 4.2.6.8 and 6.1.1.4' 
 
_symmetry_cell_setting            monoclinic
_symmetry_space_group_name_H-M    P21/n 
_symmetry_space_group_name_Hall   '-P 2yn' 

loop_ 
 _symmetry_equiv_pos_as_xyz 
 'x, y, z' 
 '-x+1/2, y+1/2, -z+1/2' 
 '-x, -y, -z' 
 'x-1/2, -y-1/2, z-1/2' 
 
_cell_length_a                    10.0457(2) 
_cell_length_b                    21.6686(5) 
_cell_length_c                    12.9568(3) 
_cell_angle_alpha                 90.00 
_cell_angle_beta                  93.8920(10) 
_cell_angle_gamma                 90.00 
_cell_volume                      2813.88(11) 
_cell_formula_units_Z             4 
_cell_measurement_temperature     150(2) 
_cell_measurement_reflns_used            9988
_cell_measurement_theta_min              2.45
_cell_measurement_theta_max             27.43
 
_exptl_crystal_description        prism
_exptl_crystal_colour             colorless 
_exptl_crystal_size_max           0.31 
_exptl_crystal_size_mid           0.30 
_exptl_crystal_size_min           0.14 
_exptl_crystal_density_meas       ? 
_exptl_crystal_density_diffrn     2.236 
_exptl_crystal_density_method     'not measured' 
_exptl_crystal_F_000              1744 
_exptl_absorpt_coefficient_mu     4.815 
_exptl_absorpt_correction_type                              multi-scan
_exptl_absorpt_process_details
;
  [Sheldrick, G.M. (2002). SADABS Bruker AXS Inc., Madison, Wisconsin, USA]
;
_exptl_absorpt_correction_T_min                      0.245
_exptl_absorpt_correction_T_max                      0.510

#----------------------------- Remark ------------------------------------#
# SADABS output:                                                          #
# Estimated minimum and maximum transmission:  0.4907  0.7456             #
# The ratio of these values is more reliable than their absolute values!  #
#-------------------------------------------------------------------------#
 
_diffrn_measurement_device_type         'APEXII, Bruker-AXS'
_diffrn_measurement_method              'CCD rotation images, thin slices'
_diffrn_detector                        'CCD plate'
_diffrn_ambient_temperature             150(2)
_diffrn_radiation_wavelength            0.71073
_diffrn_radiation_type                  MoK\a
_diffrn_radiation_monochromator         graphite
_diffrn_radiation_probe                 x-ray
_diffrn_standards_number          ? 
_diffrn_standards_interval_count  ? 
_diffrn_standards_interval_time   ? 
_diffrn_standards_decay_%         ? 
_diffrn_reflns_number             24110 
_diffrn_reflns_av_R_equivalents   0.0300 
_diffrn_reflns_av_sigmaI/netI     0.0263 
_diffrn_reflns_limit_h_min        -13 
_diffrn_reflns_limit_h_max        13 
_diffrn_reflns_limit_k_min        -28 
_diffrn_reflns_limit_k_max        28 
_diffrn_reflns_limit_l_min        -16 
_diffrn_reflns_limit_l_max        14 
_diffrn_reflns_theta_min          1.83 
_diffrn_reflns_theta_max          27.48 
_reflns_number_total              6401 
_reflns_number_gt                 5566 
_reflns_threshold_expression      >2sigma(I) 
 
_computing_data_collection              'Bruker SAINT (Bruker, 2002)'
_computing_cell_refinement              'Bruker SMART (Bruker, 2002)'
_computing_data_reduction               'Bruker SAINT (Bruker, 2002)'
_computing_structure_solution           'SIR97 (ALtomare et al., 1999))'
_computing_structure_refinement         'SHELXL-97 (Sheldrick, 1997)'
_computing_molecular_graphics           'Ortep-3 for Windows (Farrugia, 1997)'
_computing_publication_material  'WinGX publication routines (Farrugia, 1999)'

 
_refine_special_details 
; 
 Refinement of F^2^ against ALL reflections.  The weighted R-factor wR and 
 goodness of fit S are based on F^2^, conventional R-factors R are based 
 on F, with F set to zero for negative F^2^. The threshold expression of 
 F^2^ > 2sigma(F^2^) is used only for calculating R-factors(gt) etc. and is 
 not relevant to the choice of reflections for refinement.  R-factors based 
 on F^2^ are statistically about twice as large as those based on F, and R- 
 factors based on ALL data will be even larger. 
; 
 
_refine_ls_structure_factor_coef  Fsqd  
_refine_ls_matrix_type            full 
_refine_ls_weighting_scheme       calc  
_refine_ls_weighting_details 
 'calc w=1/[\s^2^(Fo^2^)+(0.0473P)^2^+11.2731P] where P=(Fo^2^+2Fc^2^)/3' 
_atom_sites_solution_primary      direct 
_atom_sites_solution_secondary    difmap 
_atom_sites_solution_hydrogens    geom 
_refine_ls_hydrogen_treatment     constr
_refine_ls_extinction_method      none 
_refine_ls_extinction_coef        ? 
_refine_ls_number_reflns          6401 
_refine_ls_number_parameters      297 
_refine_ls_number_restraints      0 
_refine_ls_R_factor_all           0.0423 
_refine_ls_R_factor_gt            0.0348 
_refine_ls_wR_factor_ref          0.1047 
_refine_ls_wR_factor_gt           0.0912 
_refine_ls_goodness_of_fit_ref    1.104 
_refine_ls_restrained_S_all       1.104 
_refine_ls_shift/su_max           0.001 
_refine_ls_shift/su_mean          0.000 
 
loop_ 
 _atom_site_label 
 _atom_site_type_symbol 
 _atom_site_fract_x 
 _atom_site_fract_y 
 _atom_site_fract_z 
 _atom_site_U_iso_or_equiv 
 _atom_site_adp_type 
 _atom_site_occupancy 
 _atom_site_symmetry_multiplicity 
 _atom_site_calc_flag 
 _atom_site_refinement_flags 
 _atom_site_disorder_assembly 
 _atom_site_disorder_group 
I1 I 1.52483(4) 0.63445(2) 0.22276(3) 0.04612(12) Uani 1 1 d . . . 
I2 I 0.58977(4) 0.762763(19) 0.51184(3) 0.04293(11) Uani 1 1 d . . . 
I3 I 0.79828(3) 0.306945(16) 0.38609(3) 0.03508(10) Uani 1 1 d . . . 
I4 I 0.67305(3) 0.159519(16) 0.39185(3) 0.03298(10) Uani 1 1 d . . . 
C1 C 1.0663(5) 0.5278(2) 0.3437(4) 0.0298(10) Uani 1 1 d . . . 
C2 C 1.1086(5) 0.5892(3) 0.3366(4) 0.0296(10) Uani 1 1 d . . . 
C3 C 1.0183(5) 0.6339(2) 0.3649(4) 0.0298(10) Uani 1 1 d . . . 
C4 C 0.8938(5) 0.6205(3) 0.4013(4) 0.0301(11) Uani 1 1 d . . . 
C5 C 0.8603(5) 0.5585(3) 0.4053(4) 0.0304(11) Uani 1 1 d . . . 
C6 C 0.9424(5) 0.5103(2) 0.3773(4) 0.0304(11) Uani 1 1 d . . . 
C7 C 1.2381(5) 0.6045(3) 0.3044(4) 0.0356(12) Uani 1 1 d . . . 
C8 C 1.3450(6) 0.6164(3) 0.2772(5) 0.0416(14) Uani 1 1 d . . . 
C9 C 0.8063(5) 0.6672(3) 0.4338(5) 0.0349(12) Uani 1 1 d . . . 
C10 C 0.7300(6) 0.7046(3) 0.4626(5) 0.0406(13) Uani 1 1 d . . . 
C11 C 0.9018(5) 0.4475(3) 0.3813(4) 0.0340(11) Uani 1 1 d . . . 
C12 C 0.8650(6) 0.3956(3) 0.3837(4) 0.0355(12) Uani 1 1 d . . . 
F1 F 1.1504(3) 0.48337(15) 0.3185(3) 0.0417(8) Uani 1 1 d . . . 
F2 F 1.0538(3) 0.69321(14) 0.3569(3) 0.0376(7) Uani 1 1 d . . . 
F3 F 0.7417(3) 0.54344(16) 0.4405(3) 0.0411(8) Uani 1 1 d . . . 
S1A S 0.3496(3) 0.38194(12) 0.2033(2) 0.0532(6) Uani 0.670(3) 1 d P A 1 
C13A C 0.4076(10) 0.3918(5) 0.3361(9) 0.0518(13) Uani 0.670(3) 1 d P A 1 
H13A H 0.3303 0.3915 0.3772 0.062 Uiso 0.670(3) 1 calc PR A 1 
H13B H 0.4613 0.3561 0.3566 0.062 Uiso 0.670(3) 1 calc PR A 1 
C14A C 0.4864(13) 0.4476(6) 0.3643(10) 0.108(2) Uani 0.670(3) 1 d P A 1 
H14A H 0.5109 0.4473 0.4372 0.162 Uiso 0.670(3) 1 calc PR A 1 
H14B H 0.4340 0.4837 0.3472 0.162 Uiso 0.670(3) 1 calc PR A 1 
H14C H 0.5655 0.4482 0.3267 0.162 Uiso 0.670(3) 1 calc PR A 1 
C15A C 0.5240(10) 0.3429(5) 0.1741(9) 0.0518(13) Uani 0.670(3) 1 d P A 1 
H15A H 0.5953 0.3681 0.2058 0.062 Uiso 0.670(3) 1 calc PR A 1 
H15B H 0.5291 0.3029 0.2077 0.062 Uiso 0.670(3) 1 calc PR A 1 
C16A C 0.5447(13) 0.3357(6) 0.0823(10) 0.108(2) Uani 0.670(3) 1 d P A 1 
H16A H 0.6377 0.3420 0.0729 0.162 Uiso 0.670(3) 1 calc PR A 1 
H16B H 0.4926 0.3649 0.0410 0.162 Uiso 0.670(3) 1 calc PR A 1 
H16C H 0.5199 0.2945 0.0614 0.162 Uiso 0.670(3) 1 calc PR A 1 
C17A C 0.2583(10) 0.3108(5) 0.2006(9) 0.0518(13) Uani 0.670(3) 1 d P A 1 
H17A H 0.2421 0.2980 0.1291 0.062 Uiso 0.670(3) 1 calc PR A 1 
H17B H 0.3136 0.2795 0.2356 0.062 Uiso 0.670(3) 1 calc PR A 1 
C18A C 0.1395(13) 0.3127(6) 0.2448(10) 0.108(2) Uani 0.670(3) 1 d P A 1 
H18A H 0.0982 0.2728 0.2401 0.162 Uiso 0.670(3) 1 calc PR A 1 
H18B H 0.0823 0.3425 0.2094 0.162 Uiso 0.670(3) 1 calc PR A 1 
H18C H 0.1541 0.3242 0.3162 0.162 Uiso 0.670(3) 1 calc PR A 1 
S1B S 0.4300(6) 0.3445(2) 0.2471(4) 0.0532(6) Uani 0.330(3) 1 d P A 2 
C13B C 0.486(2) 0.4204(10) 0.2853(18) 0.0518(13) Uani 0.330(3) 1 d P A 2 
H13C H 0.5789 0.4212 0.2683 0.062 Uiso 0.330(3) 1 calc PR A 2 
H13D H 0.4395 0.4476 0.2356 0.062 Uiso 0.330(3) 1 calc PR A 2 
C14B C 0.4864(13) 0.4476(6) 0.3643(10) 0.108(2) Uani 0.330(3) 1 d P A 2 
H14D H 0.5242 0.4879 0.3560 0.162 Uiso 0.330(3) 1 calc PR A 2 
H14E H 0.5385 0.4255 0.4169 0.162 Uiso 0.330(3) 1 calc PR A 2 
H14F H 0.3965 0.4517 0.3841 0.162 Uiso 0.330(3) 1 calc PR A 2 
C15B C 0.450(2) 0.3886(10) 0.1070(18) 0.0518(13) Uani 0.330(3) 1 d P A 2 
H15C H 0.3690 0.3904 0.0623 0.062 Uiso 0.330(3) 1 calc PR A 2 
H15D H 0.4932 0.4287 0.1132 0.062 Uiso 0.330(3) 1 calc PR A 2 
C16B C 0.5447(13) 0.3357(6) 0.0823(10) 0.108(2) Uani 0.330(3) 1 d P A 2 
H16D H 0.5697 0.3397 0.0124 0.162 Uiso 0.330(3) 1 calc PR A 2 
H16E H 0.5002 0.2969 0.0901 0.162 Uiso 0.330(3) 1 calc PR A 2 
H16F H 0.6231 0.3373 0.1288 0.162 Uiso 0.330(3) 1 calc PR A 2 
C17B C 0.251(2) 0.3533(10) 0.2501(19) 0.0518(13) Uani 0.330(3) 1 d P A 2 
H17C H 0.2410 0.3761 0.3136 0.062 Uiso 0.330(3) 1 calc PR A 2 
H17D H 0.2288 0.3826 0.1949 0.062 Uiso 0.330(3) 1 calc PR A 2 
C18B C 0.1395(13) 0.3127(6) 0.2448(10) 0.108(2) Uani 0.330(3) 1 d P A 2 
H18D H 0.0589 0.3362 0.2482 0.162 Uiso 0.330(3) 1 calc PR A 2 
H18E H 0.1477 0.2844 0.3018 0.162 Uiso 0.330(3) 1 calc PR A 2 
H18F H 0.1367 0.2902 0.1809 0.162 Uiso 0.330(3) 1 calc PR A 2 
C19A C 0.7905(19) 0.4918(10) 1.0144(14) 0.045(4) Uani 0.512(4) 1 d P B 3 
H19A H 0.8256 0.5339 1.0124 0.054 Uiso 0.512(4) 1 calc PR B 3 
Cl1A Cl 0.8103(4) 0.4649(2) 1.1455(3) 0.0626(11) Uani 0.512(4) 1 d P B 3 
Cl2A Cl 0.6219(4) 0.49407(19) 0.9745(4) 0.0739(13) Uani 0.512(4) 1 d P B 3 
Cl3A Cl 0.8821(5) 0.4465(2) 0.9376(3) 0.0717(13) Uani 0.512(4) 1 d P B 3 
C19B C 0.8221(18) 0.4885(10) 1.0576(13) 0.041(4) Uani 0.488(4) 1 d P B 4 
H19B H 0.8598 0.5299 1.0514 0.049 Uiso 0.488(4) 1 calc PR B 4 
Cl1B Cl 0.6949(3) 0.49094(18) 1.1469(3) 0.0563(10) Uani 0.488(4) 1 d P B 4 
Cl2B Cl 0.9491(4) 0.4378(2) 1.1076(3) 0.0640(11) Uani 0.488(4) 1 d P B 4 
Cl3B Cl 0.7612(5) 0.4635(2) 0.9362(3) 0.0735(14) Uani 0.488(4) 1 d P B 4 
 
loop_ 
 _atom_site_aniso_label 
 _atom_site_aniso_U_11 
 _atom_site_aniso_U_22 
 _atom_site_aniso_U_33 
 _atom_site_aniso_U_23 
 _atom_site_aniso_U_13 
 _atom_site_aniso_U_12 
I1 0.03036(19) 0.0623(3) 0.0468(2) -0.00432(19) 0.01077(16) -0.01383(17) 
I2 0.0406(2) 0.0432(2) 0.0454(2) 0.00352(17) 0.00628(16) 0.01458(16) 
I3 0.03335(18) 0.02893(18) 0.0424(2) 0.00462(15) -0.00169(14) -0.00498(13) 
I4 0.02689(16) 0.02994(18) 0.0430(2) -0.00257(14) 0.00914(13) -0.00057(12) 
C1 0.027(2) 0.031(3) 0.032(3) 0.000(2) 0.0031(19) 0.0032(19) 
C2 0.028(2) 0.035(3) 0.026(2) -0.001(2) 0.0035(19) -0.006(2) 
C3 0.032(2) 0.028(3) 0.030(3) -0.001(2) 0.002(2) -0.006(2) 
C4 0.028(2) 0.034(3) 0.028(3) 0.001(2) 0.0019(19) 0.000(2) 
C5 0.026(2) 0.034(3) 0.031(3) 0.005(2) 0.0047(19) -0.003(2) 
C6 0.031(2) 0.028(3) 0.031(3) 0.005(2) 0.000(2) -0.001(2) 
C7 0.033(3) 0.041(3) 0.033(3) -0.003(2) 0.006(2) -0.006(2) 
C8 0.033(3) 0.053(4) 0.040(3) -0.006(3) 0.008(2) -0.011(3) 
C9 0.033(3) 0.034(3) 0.038(3) 0.002(2) 0.001(2) 0.000(2) 
C10 0.035(3) 0.043(3) 0.044(3) 0.002(3) 0.005(2) 0.009(2) 
C11 0.036(3) 0.034(3) 0.032(3) 0.004(2) 0.000(2) -0.005(2) 
C12 0.039(3) 0.032(3) 0.035(3) 0.003(2) 0.001(2) -0.004(2) 
F1 0.0402(18) 0.0315(17) 0.054(2) -0.0048(15) 0.0103(15) 0.0054(14) 
F2 0.0418(17) 0.0269(16) 0.0447(19) 0.0002(14) 0.0070(14) -0.0079(13) 
F3 0.0277(15) 0.0417(19) 0.055(2) 0.0056(16) 0.0124(14) -0.0070(13) 
S1A 0.0803(17) 0.0406(12) 0.0408(12) -0.0024(9) 0.0186(11) -0.0251(11) 
C13A 0.047(3) 0.047(3) 0.061(3) -0.004(2) 0.001(2) -0.005(2) 
C14A 0.111(5) 0.096(5) 0.117(6) -0.029(4) 0.014(4) -0.040(4) 
C15A 0.047(3) 0.047(3) 0.061(3) -0.004(2) 0.001(2) -0.005(2) 
C16A 0.111(5) 0.096(5) 0.117(6) -0.029(4) 0.014(4) -0.040(4) 
C17A 0.047(3) 0.047(3) 0.061(3) -0.004(2) 0.001(2) -0.005(2) 
C18A 0.111(5) 0.096(5) 0.117(6) -0.029(4) 0.014(4) -0.040(4) 
S1B 0.0803(17) 0.0406(12) 0.0408(12) -0.0024(9) 0.0186(11) -0.0251(11) 
C13B 0.047(3) 0.047(3) 0.061(3) -0.004(2) 0.001(2) -0.005(2) 
C14B 0.111(5) 0.096(5) 0.117(6) -0.029(4) 0.014(4) -0.040(4) 
C15B 0.047(3) 0.047(3) 0.061(3) -0.004(2) 0.001(2) -0.005(2) 
C16B 0.111(5) 0.096(5) 0.117(6) -0.029(4) 0.014(4) -0.040(4) 
C17B 0.047(3) 0.047(3) 0.061(3) -0.004(2) 0.001(2) -0.005(2) 
C18B 0.111(5) 0.096(5) 0.117(6) -0.029(4) 0.014(4) -0.040(4) 
C19A 0.052(9) 0.034(7) 0.049(11) -0.013(9) 0.000(8) -0.008(7) 
Cl1A 0.072(2) 0.074(3) 0.0412(18) 0.0139(17) -0.0005(15) -0.0122(19) 
Cl2A 0.054(2) 0.057(2) 0.107(3) 0.022(2) -0.020(2) -0.0056(17) 
Cl3A 0.081(3) 0.070(3) 0.067(2) -0.030(2) 0.022(2) -0.017(2) 
C19B 0.040(9) 0.044(9) 0.041(10) -0.017(9) 0.015(7) -0.010(7) 
Cl1B 0.0406(17) 0.054(2) 0.076(3) -0.0092(18) 0.0156(16) 0.0016(14) 
Cl2B 0.055(2) 0.078(3) 0.060(2) -0.003(2) 0.0074(16) 0.0218(19) 
Cl3B 0.084(3) 0.084(3) 0.049(2) -0.006(2) -0.014(2) -0.017(2) 
 
_geom_special_details 
; 
 All esds (except the esd in the dihedral angle between two l.s. planes) 
 are estimated using the full covariance matrix.  The cell esds are taken 
 into account individually in the estimation of esds in distances, angles 
 and torsion angles; correlations between esds in cell parameters are only 
 used when they are defined by crystal symmetry.  An approximate (isotropic) 
 treatment of cell esds is used for estimating esds involving l.s. planes. 
; 
 
loop_ 
 _geom_bond_atom_site_label_1 
 _geom_bond_atom_site_label_2 
 _geom_bond_distance 
 _geom_bond_site_symmetry_2 
 _geom_bond_publ_flag 
I1 C8 2.021(6) . ? 
I2 C10 2.026(6) . ? 
I3 C12 2.036(6) . ? 
C1 F1 1.335(6) . ? 
C1 C6 1.398(7) . ? 
C1 C2 1.401(7) . ? 
C2 C3 1.394(7) . ? 
C2 C7 1.432(7) . ? 
C3 F2 1.340(6) . ? 
C3 C4 1.397(7) . ? 
C4 C5 1.386(7) . ? 
C4 C9 1.423(8) . ? 
C5 F3 1.345(6) . ? 
C5 C6 1.394(8) . ? 
C6 C11 1.424(7) . ? 
C7 C8 1.182(8) . ? 
C9 C10 1.192(8) . ? 
C11 C12 1.184(8) . ? 
S1A C17A 1.793(11) . ? 
S1A C13A 1.793(11) . ? 
S1A C15A 2.005(11) . ? 
C13A C14A 1.477(14) . ? 
C13A H13A 0.9700 . ? 
C13A H13B 0.9700 . ? 
C14A H14A 0.9600 . ? 
C14A H14B 0.9600 . ? 
C14A H14C 0.9600 . ? 
C15A C16A 1.232(16) . ? 
C15A H15A 0.9700 . ? 
C15A H15B 0.9700 . ? 
C16A H16A 0.9600 . ? 
C16A H16B 0.9600 . ? 
C16A H16C 0.9600 . ? 
C17A C18A 1.359(16) . ? 
C17A H17A 0.9700 . ? 
C17A H17B 0.9700 . ? 
C18A H18A 0.9600 . ? 
C18A H18B 0.9600 . ? 
C18A H18C 0.9600 . ? 
S1B C13B 1.80(2) . ? 
S1B C17B 1.81(2) . ? 
S1B C15B 2.07(2) . ? 
C13B H13C 0.9700 . ? 
C13B H13D 0.9700 . ? 
C15B H15C 0.9700 . ? 
C15B H15D 0.9700 . ? 
C17B H17C 0.9700 . ? 
C17B H17D 0.9700 . ? 
C19A Cl3A 1.71(2) . ? 
C19A Cl2A 1.738(19) . ? 
C19A Cl1A 1.793(19) . ? 
C19A H19A 0.9800 . ? 
C19B Cl3B 1.735(17) . ? 
C19B Cl2B 1.77(2) . ? 
C19B Cl1B 1.782(17) . ? 
C19B H19B 0.9800 . ? 
 
loop_ 
 _geom_angle_atom_site_label_1 
 _geom_angle_atom_site_label_2 
 _geom_angle_atom_site_label_3 
 _geom_angle 
 _geom_angle_site_symmetry_1 
 _geom_angle_site_symmetry_3 
 _geom_angle_publ_flag 
F1 C1 C6 118.2(5) . . ? 
F1 C1 C2 117.9(4) . . ? 
C6 C1 C2 123.8(5) . . ? 
C3 C2 C1 116.0(4) . . ? 
C3 C2 C7 122.3(5) . . ? 
C1 C2 C7 121.7(5) . . ? 
F2 C3 C2 117.8(4) . . ? 
F2 C3 C4 118.3(5) . . ? 
C2 C3 C4 123.9(5) . . ? 
C5 C4 C3 116.0(5) . . ? 
C5 C4 C9 121.5(5) . . ? 
C3 C4 C9 122.5(5) . . ? 
F3 C5 C4 118.1(5) . . ? 
F3 C5 C6 117.4(5) . . ? 
C4 C5 C6 124.5(5) . . ? 
C5 C6 C1 115.7(5) . . ? 
C5 C6 C11 122.1(5) . . ? 
C1 C6 C11 122.2(5) . . ? 
C8 C7 C2 179.0(7) . . ? 
C7 C8 I1 176.8(6) . . ? 
C10 C9 C4 177.4(6) . . ? 
C9 C10 I2 175.6(6) . . ? 
C12 C11 C6 178.4(6) . . ? 
C11 C12 I3 178.8(5) . . ? 
C17A S1A C13A 104.7(5) . . ? 
C17A S1A C15A 94.9(5) . . ? 
C13A S1A C15A 90.0(5) . . ? 
C14A C13A S1A 117.9(9) . . ? 
C14A C13A H13A 107.8 . . ? 
S1A C13A H13A 107.8 . . ? 
C14A C13A H13B 107.8 . . ? 
S1A C13A H13B 107.8 . . ? 
H13A C13A H13B 107.2 . . ? 
C13A C14A H14A 109.5 . . ? 
C13A C14A H14B 109.5 . . ? 
H14A C14A H14B 109.5 . . ? 
C13A C14A H14C 109.5 . . ? 
H14A C14A H14C 109.5 . . ? 
H14B C14A H14C 109.5 . . ? 
C16A C15A S1A 116.3(10) . . ? 
C16A C15A H15A 108.2 . . ? 
S1A C15A H15A 108.2 . . ? 
C16A C15A H15B 108.2 . . ? 
S1A C15A H15B 108.2 . . ? 
H15A C15A H15B 107.4 . . ? 
C15A C16A H16A 109.5 . . ? 
C15A C16A H16B 109.5 . . ? 
H16A C16A H16B 109.5 . . ? 
C15A C16A H16C 109.5 . . ? 
H16A C16A H16C 109.5 . . ? 
H16B C16A H16C 109.5 . . ? 
C18A C17A S1A 115.3(9) . . ? 
C18A C17A H17A 108.4 . . ? 
S1A C17A H17A 108.4 . . ? 
C18A C17A H17B 108.4 . . ? 
S1A C17A H17B 108.4 . . ? 
H17A C17A H17B 107.5 . . ? 
C17A C18A H18A 109.5 . . ? 
C17A C18A H18B 109.5 . . ? 
H18A C18A H18B 109.5 . . ? 
C17A C18A H18C 109.5 . . ? 
H18A C18A H18C 109.5 . . ? 
H18B C18A H18C 109.5 . . ? 
C13B S1B C17B 101.1(10) . . ? 
C13B S1B C15B 76.8(10) . . ? 
C17B S1B C15B 97.3(10) . . ? 
S1B C13B H13C 104.1 . . ? 
S1B C13B H13D 104.1 . . ? 
H13C C13B H13D 105.5 . . ? 
S1B C15B H15C 114.3 . . ? 
S1B C15B H15D 114.3 . . ? 
H15C C15B H15D 111.4 . . ? 
S1B C17B H17C 103.3 . . ? 
S1B C17B H17D 103.3 . . ? 
H17C C17B H17D 105.2 . . ? 
Cl3A C19A Cl2A 113.3(9) . . ? 
Cl3A C19A Cl1A 109.6(11) . . ? 
Cl2A C19A Cl1A 109.5(11) . . ? 
Cl3A C19A H19A 108.1 . . ? 
Cl2A C19A H19A 108.1 . . ? 
Cl1A C19A H19A 108.1 . . ? 
Cl3B C19B Cl2B 109.8(11) . . ? 
Cl3B C19B Cl1B 112.0(10) . . ? 
Cl2B C19B Cl1B 108.2(10) . . ? 
Cl3B C19B H19B 109.0 . . ? 
Cl2B C19B H19B 109.0 . . ? 
Cl1B C19B H19B 109.0 . . ? 
 
loop_ 
 _geom_torsion_atom_site_label_1 
 _geom_torsion_atom_site_label_2 
 _geom_torsion_atom_site_label_3 
 _geom_torsion_atom_site_label_4 
 _geom_torsion 
 _geom_torsion_site_symmetry_1 
 _geom_torsion_site_symmetry_2 
 _geom_torsion_site_symmetry_3 
 _geom_torsion_site_symmetry_4 
 _geom_torsion_publ_flag 
F1 C1 C2 C3 -179.2(5) . . . . ? 
C6 C1 C2 C3 -0.4(8) . . . . ? 
F1 C1 C2 C7 -0.6(8) . . . . ? 
C6 C1 C2 C7 178.2(5) . . . . ? 
C1 C2 C3 F2 -178.5(5) . . . . ? 
C7 C2 C3 F2 2.9(8) . . . . ? 
C1 C2 C3 C4 1.8(8) . . . . ? 
C7 C2 C3 C4 -176.8(5) . . . . ? 
F2 C3 C4 C5 178.2(5) . . . . ? 
C2 C3 C4 C5 -2.1(8) . . . . ? 
F2 C3 C4 C9 -2.6(8) . . . . ? 
C2 C3 C4 C9 177.1(5) . . . . ? 
C3 C4 C5 F3 179.6(5) . . . . ? 
C9 C4 C5 F3 0.4(8) . . . . ? 
C3 C4 C5 C6 1.0(8) . . . . ? 
C9 C4 C5 C6 -178.2(5) . . . . ? 
F3 C5 C6 C1 -178.3(5) . . . . ? 
C4 C5 C6 C1 0.2(8) . . . . ? 
F3 C5 C6 C11 2.5(8) . . . . ? 
C4 C5 C6 C11 -178.9(5) . . . . ? 
F1 C1 C6 C5 178.3(5) . . . . ? 
C2 C1 C6 C5 -0.6(8) . . . . ? 
F1 C1 C6 C11 -2.6(8) . . . . ? 
C2 C1 C6 C11 178.6(5) . . . . ? 
C3 C2 C7 C8 -159(43) . . . . ? 
C1 C2 C7 C8 22(43) . . . . ? 
C2 C7 C8 I1 41(51) . . . . ? 
C5 C4 C9 C10 10(15) . . . . ? 
C3 C4 C9 C10 -170(14) . . . . ? 
C4 C9 C10 I2 -20(21) . . . . ? 
C5 C6 C11 C12 43(24) . . . . ? 
C1 C6 C11 C12 -137(24) . . . . ? 
C6 C11 C12 I3 7(47) . . . . ? 
C17A S1A C13A C14A -179.4(9) . . . . ? 
C15A S1A C13A C14A 85.5(10) . . . . ? 
C17A S1A C15A C16A 87.0(10) . . . . ? 
C13A S1A C15A C16A -168.2(10) . . . . ? 
C13A S1A C17A C18A 71.3(11) . . . . ? 
C15A S1A C17A C18A 162.6(10) . . . . ? 
 
_diffrn_measured_fraction_theta_max    0.995 
_diffrn_reflns_theta_full              27.48 
_diffrn_measured_fraction_theta_full   0.995 
_refine_diff_density_max    1.726 
_refine_diff_density_min   -1.598 
_refine_diff_density_rms    0.172 


#===END


data_1-Et3MeNI 
 
_audit_creation_method            SHELXL-97 
_chemical_name_systematic 
; 
 ? 
; 
_chemical_name_common             ? 
_chemical_melting_point           ? 
_chemical_formula_moiety          
'C12 F3 I3, C7 H18 N, C H Cl3, I' 
_chemical_formula_sum 
 'C20 H19 Cl3 F3 I4 N' 
_chemical_formula_weight          944.31 
 
loop_ 
 _atom_type_symbol 
 _atom_type_description 
 _atom_type_scat_dispersion_real 
 _atom_type_scat_dispersion_imag 
 _atom_type_scat_source 
 'C'  'C'   0.0033   0.0016 
 'International Tables Vol C Tables 4.2.6.8 and 6.1.1.4' 
 'H'  'H'   0.0000   0.0000 
 'International Tables Vol C Tables 4.2.6.8 and 6.1.1.4' 
 'N'  'N'   0.0061   0.0033 
 'International Tables Vol C Tables 4.2.6.8 and 6.1.1.4' 
 'F'  'F'   0.0171   0.0103 
 'International Tables Vol C Tables 4.2.6.8 and 6.1.1.4' 
 'I'  'I'  -0.4742   1.8119 
 'International Tables Vol C Tables 4.2.6.8 and 6.1.1.4' 
 'Cl'  'Cl'   0.1484   0.1585 
 'International Tables Vol C Tables 4.2.6.8 and 6.1.1.4' 
 
_symmetry_cell_setting            monoclinic 
_symmetry_space_group_name_H-M    'P 21/c' 
_symmetry_space_group_name_Hall   '-P 2ybc'
 
loop_ 
 _symmetry_equiv_pos_as_xyz 
 'x, y, z' 
 '-x, y+1/2, -z+1/2' 
 '-x, -y, -z' 
 'x, -y-1/2, z-1/2' 
 
_cell_length_a                    10.9075(5) 
_cell_length_b                    12.2733(5) 
_cell_length_c                    21.5797(10) 
_cell_angle_alpha                 90.00 
_cell_angle_beta                  95.915(2) 
_cell_angle_gamma                 90.00 
_cell_volume                      2873.5(2) 
_cell_formula_units_Z             4 
_cell_measurement_temperature         150(2)
_cell_measurement_reflns_used            8627
_cell_measurement_theta_min              2.52
_cell_measurement_theta_max             27.46
 
_exptl_crystal_description             prism
_exptl_crystal_colour                  colourless
_exptl_crystal_size_max                0.16
_exptl_crystal_size_mid                0.09
_exptl_crystal_size_min                0.07
_exptl_crystal_density_meas       ? 
_exptl_crystal_density_diffrn     2.183 
_exptl_crystal_density_method     'not measured' 
_exptl_crystal_F_000              1744 
_exptl_absorpt_coefficient_mu     4.645 
_exptl_absorpt_correction_type                              multi-scan
_exptl_absorpt_process_details
;
  [Sheldrick, G.M. (2002). SADABS Bruker AXS Inc., Madison, Wisconsin, USA]
;
_exptl_absorpt_correction_T_min                      0.612
_exptl_absorpt_correction_T_max                      0.722

#----------------------------- Remark --------------------------------#
# SADABS output:                                                  #
# Estimated minimum and maximum transmission:  0.6481  0.7456             #
# The ratio of these values is more reliable than their absolute values!  #
 
_exptl_special_details 
; 
 ? 
; 
 
_diffrn_ambient_temperature       150(2)
_diffrn_radiation_wavelength      0.71073
_diffrn_radiation_type            MoK\a
_diffrn_radiation_source          'fine-focus sealed tube'
_diffrn_radiation_monochromator   graphite
_diffrn_measurement_device_type   'APEXII, Bruker-AXS'
_diffrn_measurement_method        'CCD rotation images, thin slices'
_diffrn_detector                  'CCD plate'
_diffrn_standards_number          ? 
_diffrn_standards_interval_count  ? 
_diffrn_standards_interval_time   ? 
_diffrn_standards_decay_%         ? 
_diffrn_reflns_number             22681 
_diffrn_reflns_av_R_equivalents   0.0331 
_diffrn_reflns_av_sigmaI/netI     0.0347 
_diffrn_reflns_limit_h_min        -14 
_diffrn_reflns_limit_h_max        8 
_diffrn_reflns_limit_k_min        -15 
_diffrn_reflns_limit_k_max        15 
_diffrn_reflns_limit_l_min        -27 
_diffrn_reflns_limit_l_max        27 
_diffrn_reflns_theta_min          1.90 
_diffrn_reflns_theta_max          27.54 
_reflns_number_total              6517 
_reflns_number_gt                 5549 
_reflns_threshold_expression      >2sigma(I) 
 
_computing_data_collection        'Bruker SMART, 2006'
_computing_cell_refinement        'Bruker SMART, 2006'
_computing_data_reduction         'Bruker SAINT, 2006'
_computing_structure_solution     'SIR97 (Altomare et al., 1999)'
_computing_structure_refinement   'SHELXL-97 (Sheldrick, 1997)'
_computing_molecular_graphics     'Ortep-3 for Windows (Farrugia, 1997)'
_computing_publication_material   'WinGX publication routines (Farrugia, 1999)'
 
_refine_special_details 
; 
 Refinement of F^2^ against ALL reflections.  The weighted R-factor wR and 
 goodness of fit S are based on F^2^, conventional R-factors R are based 
 on F, with F set to zero for negative F^2^. The threshold expression of 
 F^2^ > 2sigma(F^2^) is used only for calculating R-factors(gt) etc. and is 
 not relevant to the choice of reflections for refinement.  R-factors based 
 on F^2^ are statistically about twice as large as those based on F, and R- 
 factors based on ALL data will be even larger. 
; 
 
_refine_ls_structure_factor_coef  Fsqd  
_refine_ls_matrix_type            full 
_refine_ls_weighting_scheme       calc  
_refine_ls_weighting_details 
 'calc w=1/[\s^2^(Fo^2^)+(0.0358P)^2^+56.4168P] where P=(Fo^2^+2Fc^2^)/3' 
_atom_sites_solution_primary      direct 
_atom_sites_solution_secondary    difmap 
_atom_sites_solution_hydrogens    geom 
_refine_ls_hydrogen_treatment     constr 
_refine_ls_extinction_method      none 
_refine_ls_extinction_coef        ? 
_refine_ls_number_reflns          6517 
_refine_ls_number_parameters      280 
_refine_ls_number_restraints      0 
_refine_ls_R_factor_all           0.0674 
_refine_ls_R_factor_gt            0.0574 
_refine_ls_wR_factor_ref          0.1452 
_refine_ls_wR_factor_gt           0.1397 
_refine_ls_goodness_of_fit_ref    1.160 
_refine_ls_restrained_S_all       1.160 
_refine_ls_shift/su_max           0.002 
_refine_ls_shift/su_mean          0.000 
 
loop_ 
 _atom_site_label 
 _atom_site_type_symbol 
 _atom_site_fract_x 
 _atom_site_fract_y 
 _atom_site_fract_z 
 _atom_site_U_iso_or_equiv 
 _atom_site_adp_type 
 _atom_site_occupancy 
 _atom_site_symmetry_multiplicity 
 _atom_site_calc_flag 
 _atom_site_refinement_flags 
 _atom_site_disorder_assembly 
 _atom_site_disorder_group 
I4 I 0.80441(6) 0.24218(5) 0.67325(3) 0.03128(16) Uani 1 1 d . . . 
I1 I 0.01608(6) 0.41056(5) 1.10463(3) 0.03059(16) Uani 1 1 d . . . 
I2 I 0.65671(6) 0.40100(6) 0.77456(3) 0.03829(18) Uani 1 1 d . . . 
I3 I 0.67043(6) 1.03575(5) 1.09226(3) 0.03403(17) Uani 1 1 d . . . 
F1 F 0.3105(5) 0.4515(4) 0.9260(3) 0.0334(12) Uani 1 1 d . . . 
F2 F 0.6113(6) 0.7222(5) 0.9276(3) 0.0404(14) Uani 1 1 d . . . 
F3 F 0.3352(6) 0.7235(5) 1.0792(3) 0.0377(14) Uani 1 1 d . . . 
C1 C 0.1435(9) 0.4903(8) 1.0593(5) 0.032(2) Uani 1 1 d . . . 
C2 C 0.2190(9) 0.5330(7) 1.0337(4) 0.0281(19) Uani 1 1 d . . . 
C3 C 0.3162(8) 0.5853(7) 1.0034(5) 0.0278(19) Uani 1 1 d . . . 
C4 C 0.3622(8) 0.5420(7) 0.9516(4) 0.0241(18) Uani 1 1 d . . . 
C5 C 0.4617(9) 0.5841(8) 0.9244(4) 0.029(2) Uani 1 1 d . . . 
C6 C 0.5146(8) 0.6777(8) 0.9527(4) 0.0270(19) Uani 1 1 d . . . 
C7 C 0.4740(9) 0.7274(8) 1.0045(4) 0.0275(19) Uani 1 1 d . . . 
C8 C 0.3745(9) 0.6784(8) 1.0287(4) 0.0279(19) Uani 1 1 d . . . 
C9 C 0.5671(9) 0.4864(9) 0.8351(5) 0.034(2) Uani 1 1 d . . . 
C10 C 0.5135(9) 0.5326(9) 0.8735(5) 0.033(2) Uani 1 1 d . . . 
C11 C 0.5849(10) 0.9024(8) 1.0533(5) 0.033(2) Uani 1 1 d . . . 
C12 C 0.5335(9) 0.8237(8) 1.0322(5) 0.033(2) Uani 1 1 d . . . 
N1 N 0.2086(10) 0.1022(8) 0.2068(5) 0.045(2) Uani 1 1 d . . . 
C13 C 0.2907(14) 0.0147(14) 0.2344(10) 0.086(6) Uani 1 1 d . . . 
H13A H 0.2452 -0.0283 0.2620 0.104 Uiso 1 1 calc R . . 
H13B H 0.3591 0.0484 0.2597 0.104 Uiso 1 1 calc R . . 
C14 C 0.3429(16) -0.0620(13) 0.1881(8) 0.075(5) Uani 1 1 d . . . 
H14A H 0.3949 -0.1151 0.2104 0.113 Uiso 1 1 calc R . . 
H14B H 0.3901 -0.0209 0.1611 0.113 Uiso 1 1 calc R . . 
H14C H 0.2764 -0.0983 0.1638 0.113 Uiso 1 1 calc R . . 
C15 C 0.178(2) 0.1824(15) 0.2558(11) 0.105(7) Uani 1 1 d . . . 
H15A H 0.1438 0.1426 0.2889 0.126 Uiso 1 1 calc R . . 
H15B H 0.1144 0.2313 0.2374 0.126 Uiso 1 1 calc R . . 
C16 C 0.285(2) 0.250(2) 0.2844(13) 0.134(10) Uani 1 1 d . . . 
H16A H 0.2574 0.2983 0.3151 0.201 Uiso 1 1 calc R . . 
H16B H 0.3181 0.2922 0.2524 0.201 Uiso 1 1 calc R . . 
H16C H 0.3481 0.2029 0.3037 0.201 Uiso 1 1 calc R . . 
C17 C 0.0946(14) 0.0594(14) 0.1711(11) 0.094(7) Uani 1 1 d . . . 
H17A H 0.1169 0.0079 0.1400 0.113 Uiso 1 1 calc R . . 
H17B H 0.0500 0.1190 0.1495 0.113 Uiso 1 1 calc R . . 
C18 C 0.0089(14) 0.0014(13) 0.2155(8) 0.072(5) Uani 1 1 d . . . 
H18A H -0.0637 -0.0254 0.1914 0.108 Uiso 1 1 calc R . . 
H18B H -0.0142 0.0526 0.2458 0.108 Uiso 1 1 calc R . . 
H18C H 0.0525 -0.0583 0.2363 0.108 Uiso 1 1 calc R . . 
C19 C 0.272(2) 0.157(2) 0.1571(11) 0.150(13) Uani 1 1 d . . . 
H19A H 0.3482 0.1886 0.1752 0.225 Uiso 1 1 calc R . . 
H19B H 0.2200 0.2138 0.1382 0.225 Uiso 1 1 calc R . . 
H19C H 0.2889 0.1050 0.1260 0.225 Uiso 1 1 calc R . . 
Cl1 Cl 0.9491(3) 0.2489(3) 0.36620(17) 0.0570(8) Uani 1 1 d . . . 
Cl2 Cl 1.1521(3) 0.2752(3) 0.4611(2) 0.0750(12) Uani 1 1 d . . . 
Cl3 Cl 0.9099(4) 0.3522(4) 0.4833(2) 0.0762(11) Uani 1 1 d . . . 
C20 C 0.9948(11) 0.2546(10) 0.4469(6) 0.051(3) Uani 1 1 d . . . 
H20 H 0.9766 0.1835 0.4644 0.062 Uiso 1 1 calc R . . 
 
loop_ 
 _atom_site_aniso_label 
 _atom_site_aniso_U_11 
 _atom_site_aniso_U_22 
 _atom_site_aniso_U_33 
 _atom_site_aniso_U_23 
 _atom_site_aniso_U_13 
 _atom_site_aniso_U_12 
I4 0.0343(3) 0.0236(3) 0.0368(3) 0.0001(2) 0.0080(3) 0.0064(2) 
I1 0.0311(3) 0.0277(3) 0.0332(3) 0.0028(2) 0.0043(2) -0.0027(2) 
I2 0.0361(4) 0.0507(4) 0.0293(3) -0.0018(3) 0.0090(3) 0.0113(3) 
I3 0.0404(4) 0.0256(3) 0.0345(3) -0.0007(2) -0.0039(3) -0.0061(3) 
F1 0.039(3) 0.025(3) 0.037(3) -0.008(2) 0.007(2) -0.006(2) 
F2 0.039(3) 0.038(3) 0.046(4) -0.002(3) 0.012(3) -0.010(3) 
F3 0.050(4) 0.032(3) 0.032(3) -0.012(2) 0.010(3) 0.002(3) 
C1 0.033(5) 0.028(5) 0.034(5) -0.003(4) 0.002(4) 0.002(4) 
C2 0.032(5) 0.025(4) 0.028(5) -0.002(4) 0.008(4) 0.006(4) 
C3 0.022(4) 0.026(4) 0.035(5) 0.005(4) 0.000(4) -0.002(4) 
C4 0.024(4) 0.016(4) 0.032(5) 0.001(3) -0.002(4) 0.002(3) 
C5 0.031(5) 0.032(5) 0.023(4) 0.000(4) 0.000(4) 0.011(4) 
C6 0.025(4) 0.028(5) 0.028(5) 0.002(4) 0.003(4) 0.002(4) 
C7 0.027(5) 0.028(5) 0.027(4) 0.000(4) 0.002(4) 0.003(4) 
C8 0.031(5) 0.026(4) 0.027(5) -0.003(4) 0.005(4) 0.009(4) 
C9 0.027(5) 0.045(6) 0.032(5) -0.002(4) 0.009(4) 0.006(4) 
C10 0.032(5) 0.037(5) 0.030(5) 0.003(4) 0.000(4) 0.003(4) 
C11 0.035(5) 0.030(5) 0.032(5) -0.008(4) -0.005(4) -0.006(4) 
C12 0.029(5) 0.030(5) 0.039(5) 0.001(4) 0.006(4) 0.003(4) 
N1 0.053(6) 0.041(5) 0.043(5) 0.008(4) 0.016(5) 0.011(4) 
C13 0.043(8) 0.068(10) 0.149(18) 0.049(11) 0.017(9) 0.017(7) 
C14 0.073(11) 0.059(9) 0.091(12) -0.023(8) 0.000(9) 0.023(8) 
C15 0.102(15) 0.062(11) 0.16(2) -0.033(12) 0.040(14) 0.014(10) 
C16 0.112(19) 0.13(2) 0.16(2) -0.075(18) -0.004(17) -0.027(16) 
C17 0.041(8) 0.065(10) 0.17(2) -0.013(12) -0.007(10) 0.017(7) 
C18 0.050(8) 0.067(9) 0.101(13) 0.030(9) 0.017(8) 0.013(7) 
C19 0.106(18) 0.23(3) 0.13(2) 0.11(2) 0.071(15) 0.056(19) 
Cl1 0.0545(19) 0.0565(19) 0.062(2) 0.0030(15) 0.0145(15) 0.0005(15) 
Cl2 0.0370(17) 0.072(2) 0.115(3) 0.027(2) 0.0013(19) 0.0030(16) 
Cl3 0.056(2) 0.096(3) 0.075(3) -0.024(2) 0.0015(18) 0.012(2) 
C20 0.036(6) 0.046(7) 0.071(9) 0.023(6) 0.005(6) -0.006(5) 
 
_geom_special_details 
; 
 All esds (except the esd in the dihedral angle between two l.s. planes) 
 are estimated using the full covariance matrix.  The cell esds are taken 
 into account individually in the estimation of esds in distances, angles 
 and torsion angles; correlations between esds in cell parameters are only 
 used when they are defined by crystal symmetry.  An approximate (isotropic) 
 treatment of cell esds is used for estimating esds involving l.s. planes. 
; 
 
loop_ 
 _geom_bond_atom_site_label_1 
 _geom_bond_atom_site_label_2 
 _geom_bond_distance 
 _geom_bond_site_symmetry_2 
 _geom_bond_publ_flag 
I1 C1 2.031(11) . ? 
I2 C9 2.006(10) . ? 
I3 C11 2.023(9) . ? 
F1 C4 1.339(10) . ? 
F2 C6 1.350(11) . ? 
F3 C8 1.332(10) . ? 
C1 C2 1.164(14) . ? 
C2 C3 1.451(13) . ? 
C3 C4 1.379(13) . ? 
C3 C8 1.392(13) . ? 
C4 C5 1.385(14) . ? 
C5 C6 1.397(14) . ? 
C5 C10 1.435(14) . ? 
C6 C7 1.385(13) . ? 
C7 C8 1.389(14) . ? 
C7 C12 1.448(14) . ? 
C9 C10 1.203(14) . ? 
C11 C12 1.184(14) . ? 
N1 C13 1.483(16) . ? 
N1 C17 1.49(2) . ? 
N1 C19 1.50(2) . ? 
N1 C15 1.51(2) . ? 
C13 C14 1.53(2) . ? 
C13 H13A 0.9700 . ? 
C13 H13B 0.9700 . ? 
C14 H14A 0.9600 . ? 
C14 H14B 0.9600 . ? 
C14 H14C 0.9600 . ? 
C15 C16 1.51(3) . ? 
C15 H15A 0.9700 . ? 
C15 H15B 0.9700 . ? 
C16 H16A 0.9600 . ? 
C16 H16B 0.9600 . ? 
C16 H16C 0.9600 . ? 
C17 C18 1.58(2) . ? 
C17 H17A 0.9700 . ? 
C17 H17B 0.9700 . ? 
C18 H18A 0.9600 . ? 
C18 H18B 0.9600 . ? 
C18 H18C 0.9600 . ? 
C19 H19A 0.9600 . ? 
C19 H19B 0.9600 . ? 
C19 H19C 0.9600 . ? 
Cl1 C20 1.762(14) . ? 
Cl2 C20 1.730(12) . ? 
Cl3 C20 1.749(15) . ? 
C20 H20 0.9800 . ? 
 
loop_ 
 _geom_angle_atom_site_label_1 
 _geom_angle_atom_site_label_2 
 _geom_angle_atom_site_label_3 
 _geom_angle 
 _geom_angle_site_symmetry_1 
 _geom_angle_site_symmetry_3 
 _geom_angle_publ_flag 
C2 C1 I1 177.8(9) . . ? 
C1 C2 C3 178.1(11) . . ? 
C4 C3 C8 116.4(8) . . ? 
C4 C3 C2 122.6(8) . . ? 
C8 C3 C2 120.8(9) . . ? 
F1 C4 C3 118.8(8) . . ? 
F1 C4 C5 116.8(8) . . ? 
C3 C4 C5 124.4(8) . . ? 
C4 C5 C6 115.4(8) . . ? 
C4 C5 C10 123.2(9) . . ? 
C6 C5 C10 121.3(9) . . ? 
F2 C6 C7 118.2(8) . . ? 
F2 C6 C5 117.6(8) . . ? 
C7 C6 C5 124.2(9) . . ? 
C6 C7 C8 116.1(9) . . ? 
C6 C7 C12 121.8(9) . . ? 
C8 C7 C12 122.1(9) . . ? 
F3 C8 C7 117.3(8) . . ? 
F3 C8 C3 119.3(9) . . ? 
C7 C8 C3 123.4(9) . . ? 
C10 C9 I2 176.4(10) . . ? 
C9 C10 C5 173.2(11) . . ? 
C12 C11 I3 178.0(10) . . ? 
C11 C12 C7 177.7(11) . . ? 
C13 N1 C17 113.0(12) . . ? 
C13 N1 C19 108.1(13) . . ? 
C17 N1 C19 102.2(16) . . ? 
C13 N1 C15 111.0(14) . . ? 
C17 N1 C15 111.1(13) . . ? 
C19 N1 C15 111.1(16) . . ? 
N1 C13 C14 115.7(15) . . ? 
N1 C13 H13A 108.3 . . ? 
C14 C13 H13A 108.3 . . ? 
N1 C13 H13B 108.3 . . ? 
C14 C13 H13B 108.3 . . ? 
H13A C13 H13B 107.4 . . ? 
C13 C14 H14A 109.5 . . ? 
C13 C14 H14B 109.5 . . ? 
H14A C14 H14B 109.5 . . ? 
C13 C14 H14C 109.5 . . ? 
H14A C14 H14C 109.5 . . ? 
H14B C14 H14C 109.5 . . ? 
N1 C15 C16 115.2(17) . . ? 
N1 C15 H15A 108.5 . . ? 
C16 C15 H15A 108.5 . . ? 
N1 C15 H15B 108.5 . . ? 
C16 C15 H15B 108.5 . . ? 
H15A C15 H15B 107.5 . . ? 
C15 C16 H16A 109.5 . . ? 
C15 C16 H16B 109.5 . . ? 
H16A C16 H16B 109.5 . . ? 
C15 C16 H16C 109.5 . . ? 
H16A C16 H16C 109.5 . . ? 
H16B C16 H16C 109.5 . . ? 
N1 C17 C18 111.1(17) . . ? 
N1 C17 H17A 109.4 . . ? 
C18 C17 H17A 109.4 . . ? 
N1 C17 H17B 109.4 . . ? 
C18 C17 H17B 109.4 . . ? 
H17A C17 H17B 108.0 . . ? 
C17 C18 H18A 109.5 . . ? 
C17 C18 H18B 109.5 . . ? 
H18A C18 H18B 109.5 . . ? 
C17 C18 H18C 109.5 . . ? 
H18A C18 H18C 109.5 . . ? 
H18B C18 H18C 109.5 . . ? 
N1 C19 H19A 109.5 . . ? 
N1 C19 H19B 109.5 . . ? 
H19A C19 H19B 109.5 . . ? 
N1 C19 H19C 109.5 . . ? 
H19A C19 H19C 109.5 . . ? 
H19B C19 H19C 109.5 . . ? 
Cl2 C20 Cl3 112.5(8) . . ? 
Cl2 C20 Cl1 110.8(7) . . ? 
Cl3 C20 Cl1 111.2(7) . . ? 
Cl2 C20 H20 107.3 . . ? 
Cl3 C20 H20 107.3 . . ? 
Cl1 C20 H20 107.3 . . ? 
 
loop_ 
 _geom_torsion_atom_site_label_1 
 _geom_torsion_atom_site_label_2 
 _geom_torsion_atom_site_label_3 
 _geom_torsion_atom_site_label_4 
 _geom_torsion 
 _geom_torsion_site_symmetry_1 
 _geom_torsion_site_symmetry_2 
 _geom_torsion_site_symmetry_3 
 _geom_torsion_site_symmetry_4 
 _geom_torsion_publ_flag 
I1 C1 C2 C3 -46(49) . . . . ? 
C1 C2 C3 C4 106(32) . . . . ? 
C1 C2 C3 C8 -68(33) . . . . ? 
C8 C3 C4 F1 179.0(8) . . . . ? 
C2 C3 C4 F1 3.9(13) . . . . ? 
C8 C3 C4 C5 0.9(14) . . . . ? 
C2 C3 C4 C5 -174.2(9) . . . . ? 
F1 C4 C5 C6 -179.2(8) . . . . ? 
C3 C4 C5 C6 -1.0(13) . . . . ? 
F1 C4 C5 C10 -3.2(13) . . . . ? 
C3 C4 C5 C10 175.0(9) . . . . ? 
C4 C5 C6 F2 -179.6(8) . . . . ? 
C10 C5 C6 F2 4.3(13) . . . . ? 
C4 C5 C6 C7 0.4(14) . . . . ? 
C10 C5 C6 C7 -175.7(9) . . . . ? 
F2 C6 C7 C8 -179.8(8) . . . . ? 
C5 C6 C7 C8 0.2(14) . . . . ? 
F2 C6 C7 C12 -0.7(14) . . . . ? 
C5 C6 C7 C12 179.3(9) . . . . ? 
C6 C7 C8 F3 178.8(8) . . . . ? 
C12 C7 C8 F3 -0.3(14) . . . . ? 
C6 C7 C8 C3 -0.4(14) . . . . ? 
C12 C7 C8 C3 -179.4(9) . . . . ? 
C4 C3 C8 F3 -179.3(8) . . . . ? 
C2 C3 C8 F3 -4.1(13) . . . . ? 
C4 C3 C8 C7 -0.1(14) . . . . ? 
C2 C3 C8 C7 175.1(9) . . . . ? 
I2 C9 C10 C5 56(22) . . . . ? 
C4 C5 C10 C9 -107(10) . . . . ? 
C6 C5 C10 C9 69(10) . . . . ? 
I3 C11 C12 C7 -157(20) . . . . ? 
C6 C7 C12 C11 1(29) . . . . ? 
C8 C7 C12 C11 180(100) . . . . ? 
C17 N1 C13 C14 62.8(19) . . . . ? 
C19 N1 C13 C14 -49(2) . . . . ? 
C15 N1 C13 C14 -171.6(15) . . . . ? 
C13 N1 C15 C16 67(2) . . . . ? 
C17 N1 C15 C16 -166(2) . . . . ? 
C19 N1 C15 C16 -53(3) . . . . ? 
C13 N1 C17 C18 66.7(16) . . . . ? 
C19 N1 C17 C18 -177.4(15) . . . . ? 
C15 N1 C17 C18 -58.9(17) . . . . ? 
 
_diffrn_measured_fraction_theta_max    0.984 
_diffrn_reflns_theta_full              27.54 
_diffrn_measured_fraction_theta_full   0.984 
_refine_diff_density_max    2.784 
_refine_diff_density_min   -1.599 
_refine_diff_density_rms    0.231 

#===END


data_1-Et4NBr 
 
_audit_creation_method            SHELXL-97 
_chemical_name_systematic 
; 
 ? 
; 
_chemical_name_common             ? 
_chemical_melting_point           ? 
_chemical_formula_moiety          
'C12 F3 I3, C8 H20 N, C H Cl3, Br' 
_chemical_formula_sum 
 'C21 H21 Br Cl3 F3 I3 N' 
_chemical_formula_weight          911.35 
 
loop_ 
 _atom_type_symbol 
 _atom_type_description 
 _atom_type_scat_dispersion_real 
 _atom_type_scat_dispersion_imag 
 _atom_type_scat_source 
 'C'  'C'   0.0033   0.0016 
 'International Tables Vol C Tables 4.2.6.8 and 6.1.1.4' 
 'H'  'H'   0.0000   0.0000 
 'International Tables Vol C Tables 4.2.6.8 and 6.1.1.4' 
 'N'  'N'   0.0061   0.0033 
 'International Tables Vol C Tables 4.2.6.8 and 6.1.1.4' 
 'F'  'F'   0.0171   0.0103 
 'International Tables Vol C Tables 4.2.6.8 and 6.1.1.4' 
 'Br'  'Br'  -0.2901   2.4595 
 'International Tables Vol C Tables 4.2.6.8 and 6.1.1.4' 
 'I'  'I'  -0.4742   1.8119 
 'International Tables Vol C Tables 4.2.6.8 and 6.1.1.4' 
 'O'  'O'   0.0106   0.0060 
 'International Tables Vol C Tables 4.2.6.8 and 6.1.1.4' 
 'Cl'  'Cl'   0.1484   0.1585 
 'International Tables Vol C Tables 4.2.6.8 and 6.1.1.4' 
 
_symmetry_cell_setting            monoclinic 
_symmetry_space_group_name_H-M    'P 21/n'
_symmetry_space_group_name_Hall   '-P 2yn'


loop_ 
 _symmetry_equiv_pos_as_xyz 
 'x, y, z' 
 '-x+1/2, y+1/2, -z+1/2' 
 '-x, -y, -z' 
 'x-1/2, -y-1/2, z-1/2' 
 
_cell_length_a                    9.83820(10) 
_cell_length_b                    19.2030(4) 
_cell_length_c                    16.0481(3) 
_cell_angle_alpha                 90.00 
_cell_angle_beta                  98.6770(10) 
_cell_angle_gamma                 90.00 
_cell_volume                      2997.15(9) 
_cell_formula_units_Z             4 
_cell_measurement_temperature     293(2) 
_cell_measurement_reflns_used     7113 
_cell_measurement_theta_min       3.551 
_cell_measurement_theta_max       27.4965   
 
_exptl_crystal_description        stick
_exptl_crystal_colour             white 
_exptl_crystal_size_max           0.22 
_exptl_crystal_size_mid           0.14
_exptl_crystal_size_min           0.05
_exptl_crystal_density_meas       ? 
_exptl_crystal_density_diffrn     2.020 
_exptl_crystal_density_method     'not measured' 
_exptl_crystal_F_000              1704 
_exptl_absorpt_coefficient_mu     4.758 
_exptl_absorpt_correction_type                              multi-scan
_exptl_absorpt_process_details
;
  [Sheldrick, G.M. (2002). SADABS Bruker AXS Inc., Madison, Wisconsin, USA]
;
_exptl_absorpt_correction_T_min        0.454  
_exptl_absorpt_correction_T_max        0.788

#----------------------------- Remark --------------------------------#
# SADABS output:                                                          #
# Estimated minimum and maximum transmission:  0.5574  0.7456#
# The ratio of these values is more reliable than their absolute values!  #
#--------------------------------------------------------------------#

 
_exptl_special_details 
; 
 ? 
; 
 
_diffrn_ambient_temperature       293(2)
_diffrn_radiation_wavelength      0.71073
_diffrn_radiation_type            MoK\a
_diffrn_radiation_source          'fine-focus sealed tube'
_diffrn_measurement_device_type   'KappaCCD'
_diffrn_measurement_device        '95mm CCD camera on \k-goniostat'
_diffrn_detector_area_resol_mean  9
_diffrn_radiation_monochromator   'horizonally mounted graphite crystal'
_diffrn_measurement_method        'CCD'
_diffrn_standards_number          ? 
_diffrn_standards_interval_count  ? 
_diffrn_standards_interval_time   ? 
_diffrn_standards_decay_%         ? 
_diffrn_reflns_number             53379 
_diffrn_reflns_av_R_equivalents   0.0642 
_diffrn_reflns_av_sigmaI/netI     0.0389 
_diffrn_reflns_limit_h_min        -11 
_diffrn_reflns_limit_h_max        12 
_diffrn_reflns_limit_k_min        -23 
_diffrn_reflns_limit_k_max        24 
_diffrn_reflns_limit_l_min        -20 
_diffrn_reflns_limit_l_max        20 
_diffrn_reflns_theta_min          3.71 
_diffrn_reflns_theta_max          27.50 
_reflns_number_total              6867 
_reflns_number_gt                 4408 
_reflns_threshold_expression      >2sigma(I) 
 
_computing_data_collection        'Collect (Bruker AXS BV, 1997-2004)'
_computing_cell_refinement        'Dirax/lsq (Duisenberg & Schreurs, 1989-2000)'
_computing_data_reduction         'EvalCCD (Duisenberg & Schreurs 1990-2000)'
_computing_structure_solution     'SIR92 (Altomare et al., 1993)'
_computing_structure_refinement   'SHELXL-97 (Sheldrick, 1997)'
_computing_molecular_graphics     'Ortep-3 for Windows (Farrugia, 1997)'
_computing_publication_material   'WinGX publication routines (Farrugia, 1999)'
 
_refine_special_details 
; 
 Refinement of F^2^ against ALL reflections.  The weighted R-factor wR and 
 goodness of fit S are based on F^2^, conventional R-factors R are based 
 on F, with F set to zero for negative F^2^. The threshold expression of 
 F^2^ > 2sigma(F^2^) is used only for calculating R-factors(gt) etc. and is 
 not relevant to the choice of reflections for refinement.  R-factors based 
 on F^2^ are statistically about twice as large as those based on F, and R- 
 factors based on ALL data will be even larger. 
; 
 
_refine_ls_structure_factor_coef  Fsqd  
_refine_ls_matrix_type            full 
_refine_ls_weighting_scheme       calc  
_refine_ls_weighting_details 
 'calc w=1/[\s^2^(Fo^2^)+(0.0229P)^2^+18.0652P] where P=(Fo^2^+2Fc^2^)/3' 
_atom_sites_solution_primary      direct 
_atom_sites_solution_secondary    difmap 
_atom_sites_solution_hydrogens    geom 
_refine_ls_hydrogen_treatment     constr
_refine_ls_extinction_method      none 
_refine_ls_extinction_coef        ? 
_refine_ls_number_reflns          6867 
_refine_ls_number_parameters      289 
_refine_ls_number_restraints      0 
_refine_ls_R_factor_all           0.1026 
_refine_ls_R_factor_gt            0.0568 
_refine_ls_wR_factor_ref          0.1143 
_refine_ls_wR_factor_gt           0.0975 
_refine_ls_goodness_of_fit_ref    1.077 
_refine_ls_restrained_S_all       1.077 
_refine_ls_shift/su_max           0.001 
_refine_ls_shift/su_mean          0.000 
 
loop_ 
 _atom_site_label 
 _atom_site_type_symbol 
 _atom_site_fract_x 
 _atom_site_fract_y 
 _atom_site_fract_z 
 _atom_site_U_iso_or_equiv 
 _atom_site_adp_type 
 _atom_site_occupancy 
 _atom_site_symmetry_multiplicity 
 _atom_site_calc_flag 
 _atom_site_refinement_flags 
 _atom_site_disorder_assembly 
 _atom_site_disorder_group 
I001 I 1.09371(6) 0.28662(3) 0.53918(4) 0.06742(18) Uani 1 1 d . . . 
I002 I 0.42197(5) 0.59998(3) 0.15592(3) 0.06108(16) Uani 1 1 d . . . 
I003 I 0.42667(6) 0.61097(3) 0.80656(3) 0.06391(17) Uani 1 1 d . . . 
F3 F 0.7869(5) 0.4793(3) 0.6638(3) 0.0752(14) Uani 1 1 d . . . 
F2 F 0.4965(5) 0.6255(3) 0.4844(3) 0.0744(14) Uani 1 1 d . . . 
F1 F 0.7965(5) 0.4751(3) 0.3736(3) 0.0775(14) Uani 1 1 d . . . 
C1 C 0.9776(9) 0.3737(4) 0.5352(5) 0.062(2) Uani 1 1 d . . . 
C2 C 0.8990(8) 0.4197(5) 0.5291(5) 0.060(2) Uani 1 1 d . . . 
C3 C 0.7984(8) 0.4760(4) 0.5198(5) 0.0545(19) Uani 1 1 d . . . 
C4 C 0.7466(8) 0.5015(4) 0.4404(5) 0.0544(19) Uani 1 1 d . . . 
C5 C 0.6443(8) 0.5519(4) 0.4250(4) 0.0527(18) Uani 1 1 d . . . 
C6 C 0.5966(8) 0.5775(4) 0.4959(5) 0.0544(19) Uani 1 1 d . . . 
C7 C 0.6417(8) 0.5555(4) 0.5776(4) 0.0524(18) Uani 1 1 d . . . 
C8 C 0.7417(8) 0.5047(4) 0.5864(4) 0.0546(19) Uani 1 1 d . . . 
C9 C 0.5263(8) 0.5841(4) 0.2723(5) 0.060(2) Uani 1 1 d . . . 
C10 C 0.5855(8) 0.5715(4) 0.3417(5) 0.060(2) Uani 1 1 d . . . 
C11 C 0.5239(9) 0.5940(5) 0.7069(5) 0.066(2) Uani 1 1 d . . . 
C12 C 0.5788(9) 0.5790(4) 0.6481(5) 0.061(2) Uani 1 1 d . . . 
Br Br 0.24037(9) 0.12975(5) 0.53255(5) 0.0665(2) Uani 1 1 d . . . 
N1 N 0.8983(7) 0.6450(4) 0.1293(4) 0.0640(18) Uani 1 1 d . . . 
C13 C 0.8669(14) 0.6136(8) 0.0434(7) 0.131(5) Uani 1 1 d . . . 
H13A H 0.9305 0.5755 0.0398 0.157 Uiso 1 1 calc R . . 
H13B H 0.8845 0.6485 0.0025 0.157 Uiso 1 1 calc R . . 
C14 C 0.7224(12) 0.5865(8) 0.0182(8) 0.128(5) Uani 1 1 d . . . 
H14A H 0.7133 0.5674 -0.0376 0.191 Uiso 1 1 calc R . . 
H14B H 0.6581 0.6240 0.0191 0.191 Uiso 1 1 calc R . . 
H14C H 0.7040 0.5510 0.0570 0.191 Uiso 1 1 calc R . . 
C15 C 0.869(2) 0.5921(8) 0.1944(10) 0.157(6) Uani 1 1 d . . . 
H15A H 0.8927 0.6120 0.2502 0.188 Uiso 1 1 calc R . . 
H15B H 0.7708 0.5821 0.1859 0.188 Uiso 1 1 calc R . . 
C16 C 0.947(2) 0.5250(9) 0.1899(12) 0.221(11) Uani 1 1 d . . . 
H16A H 0.9217 0.4928 0.2308 0.331 Uiso 1 1 calc R . . 
H16B H 1.0435 0.5341 0.2015 0.331 Uiso 1 1 calc R . . 
H16C H 0.9242 0.5053 0.1345 0.331 Uiso 1 1 calc R . . 
C17 C 1.0427(12) 0.6692(9) 0.1430(10) 0.150(6) Uani 1 1 d . . . 
H17A H 1.0526 0.7062 0.1031 0.180 Uiso 1 1 calc R . . 
H17B H 1.1016 0.6311 0.1313 0.180 Uiso 1 1 calc R . . 
C18 C 1.0929(12) 0.6967(8) 0.2341(8) 0.134(5) Uani 1 1 d . . . 
H18A H 1.1861 0.7126 0.2380 0.201 Uiso 1 1 calc R . . 
H18B H 1.0882 0.6597 0.2739 0.201 Uiso 1 1 calc R . . 
H18C H 1.0352 0.7345 0.2463 0.201 Uiso 1 1 calc R . . 
C19 C 0.8011(13) 0.7064(7) 0.1401(10) 0.128(5) Uani 1 1 d . . . 
H19A H 0.7076 0.6890 0.1334 0.154 Uiso 1 1 calc R . . 
H19B H 0.8234 0.7241 0.1971 0.154 Uiso 1 1 calc R . . 
C20 C 0.807(2) 0.7635(8) 0.0819(13) 0.213(11) Uani 1 1 d . . . 
H20A H 0.7451 0.7996 0.0937 0.320 Uiso 1 1 calc R . . 
H20B H 0.7802 0.7472 0.0252 0.320 Uiso 1 1 calc R . . 
H20C H 0.8988 0.7815 0.0881 0.320 Uiso 1 1 calc R . . 
Cl1 Cl 0.8400(5) 0.6329(4) 0.8196(3) 0.206(3) Uani 1 1 d . . . 
Cl2 Cl 0.9919(6) 0.6548(4) 0.6939(3) 0.208(3) Uani 1 1 d . . . 
Cl3 Cl 1.0023(7) 0.7532(2) 0.8271(4) 0.259(4) Uani 1 1 d . . . 
C21 C 0.9902(11) 0.6683(6) 0.7979(7) 0.094(3) Uani 1 1 d . . . 
H21 H 1.0673 0.6429 0.8299 0.113 Uiso 1 1 calc R . . 
 
loop_ 
 _atom_site_aniso_label 
 _atom_site_aniso_U_11 
 _atom_site_aniso_U_22 
 _atom_site_aniso_U_33 
 _atom_site_aniso_U_23 
 _atom_site_aniso_U_13 
 _atom_site_aniso_U_12 
I001 0.0667(4) 0.0669(4) 0.0669(4) 0.0089(3) 0.0040(3) 0.0130(3) 
I002 0.0546(3) 0.0788(4) 0.0474(3) 0.0057(3) -0.0004(2) 0.0072(3) 
I003 0.0755(4) 0.0662(4) 0.0492(3) -0.0074(3) 0.0068(2) 0.0044(3) 
F3 0.083(3) 0.091(4) 0.047(3) 0.008(2) -0.005(2) 0.011(3) 
F2 0.078(3) 0.075(3) 0.069(3) 0.002(3) 0.010(2) 0.027(3) 
F1 0.085(3) 0.097(4) 0.049(3) -0.007(3) 0.005(2) 0.025(3) 
C1 0.058(5) 0.057(5) 0.068(5) 0.006(4) -0.003(4) 0.003(4) 
C2 0.054(5) 0.066(6) 0.058(5) 0.001(4) -0.002(4) 0.002(4) 
C3 0.054(4) 0.057(5) 0.048(4) 0.005(4) -0.005(3) -0.002(4) 
C4 0.056(5) 0.060(5) 0.045(4) -0.010(4) 0.001(3) -0.003(4) 
C5 0.058(5) 0.059(5) 0.038(4) -0.003(3) -0.002(3) -0.004(4) 
C6 0.051(4) 0.052(5) 0.058(5) -0.001(4) -0.001(3) 0.007(4) 
C7 0.056(4) 0.058(5) 0.043(4) -0.005(3) 0.003(3) -0.006(4) 
C8 0.055(5) 0.061(5) 0.042(4) 0.004(4) -0.008(3) -0.010(4) 
C9 0.054(5) 0.068(5) 0.058(5) 0.008(4) 0.001(4) 0.012(4) 
C10 0.059(5) 0.065(5) 0.054(5) -0.002(4) 0.005(4) 0.011(4) 
C11 0.075(6) 0.067(6) 0.056(5) -0.006(4) 0.006(4) 0.000(5) 
C12 0.071(5) 0.059(5) 0.051(5) -0.001(4) 0.001(4) 0.001(4) 
Br 0.0704(5) 0.0841(6) 0.0425(4) -0.0046(4) 0.0006(4) 0.0066(5) 
N1 0.047(4) 0.080(5) 0.066(4) -0.006(4) 0.012(3) 0.002(3) 
C13 0.137(11) 0.184(15) 0.065(7) -0.015(8) -0.002(7) -0.014(10) 
C14 0.099(9) 0.163(13) 0.109(10) -0.016(9) -0.021(7) -0.022(9) 
C15 0.231(19) 0.123(13) 0.124(12) 0.012(10) 0.055(12) 0.005(13) 
C16 0.28(2) 0.105(13) 0.23(2) 0.008(13) -0.129(18) 0.026(14) 
C17 0.062(7) 0.218(18) 0.171(14) -0.048(13) 0.024(8) 0.005(9) 
C18 0.096(9) 0.160(13) 0.136(11) -0.076(10) -0.016(8) 0.005(8) 
C19 0.086(8) 0.120(11) 0.180(14) -0.014(10) 0.024(9) 0.004(8) 
C20 0.21(2) 0.110(13) 0.28(2) 0.073(15) -0.094(17) -0.051(13) 
Cl1 0.122(3) 0.329(8) 0.165(4) -0.018(5) 0.015(3) -0.075(4) 
Cl2 0.239(6) 0.292(7) 0.099(3) 0.029(4) 0.040(3) 0.022(5) 
Cl3 0.343(8) 0.080(3) 0.281(7) -0.008(3) -0.184(6) 0.022(4) 
C21 0.096(8) 0.084(7) 0.088(7) -0.008(6) -0.032(6) 0.008(6) 
 
_geom_special_details 
; 
 All esds (except the esd in the dihedral angle between two l.s. planes) 
 are estimated using the full covariance matrix.  The cell esds are taken 
 into account individually in the estimation of esds in distances, angles 
 and torsion angles; correlations between esds in cell parameters are only 
 used when they are defined by crystal symmetry.  An approximate (isotropic) 
 treatment of cell esds is used for estimating esds involving l.s. planes. 
; 
 
loop_ 
 _geom_bond_atom_site_label_1 
 _geom_bond_atom_site_label_2 
 _geom_bond_distance 
 _geom_bond_site_symmetry_2 
 _geom_bond_publ_flag 
I001 C1 2.021(9) . ? 
I002 C9 2.015(8) . ? 
I003 C11 2.010(9) . ? 
F3 C8 1.345(8) . ? 
F2 C6 1.340(8) . ? 
F1 C4 1.345(8) . ? 
C1 C2 1.168(11) . ? 
C2 C3 1.458(11) . ? 
C3 C4 1.388(10) . ? 
C3 C8 1.391(11) . ? 
C4 C5 1.392(10) . ? 
C5 C6 1.385(10) . ? 
C5 C10 1.426(10) . ? 
C6 C7 1.385(10) . ? 
C7 C8 1.379(11) . ? 
C7 C12 1.442(11) . ? 
C9 C10 1.200(10) . ? 
C11 C12 1.190(11) . ? 
N1 C17 1.479(13) . ? 
N1 C13 1.494(13) . ? 
N1 C15 1.516(15) . ? 
N1 C19 1.543(14) . ? 
C13 C14 1.511(16) . ? 
C13 H13A 0.9700 . ? 
C13 H13B 0.9700 . ? 
C14 H14A 0.9600 . ? 
C14 H14B 0.9600 . ? 
C14 H14C 0.9600 . ? 
C15 C16 1.51(2) . ? 
C15 H15A 0.9700 . ? 
C15 H15B 0.9700 . ? 
C16 H16A 0.9600 . ? 
C16 H16B 0.9600 . ? 
C16 H16C 0.9600 . ? 
C17 C18 1.562(17) . ? 
C17 H17A 0.9700 . ? 
C17 H17B 0.9700 . ? 
C18 H18A 0.9600 . ? 
C18 H18B 0.9600 . ? 
C18 H18C 0.9600 . ? 
C19 C20 1.447(19) . ? 
C19 H19A 0.9700 . ? 
C19 H19B 0.9700 . ? 
C20 H20A 0.9600 . ? 
C20 H20B 0.9600 . ? 
C20 H20C 0.9600 . ? 
Cl1 C21 1.710(13) . ? 
Cl2 C21 1.691(11) . ? 
Cl3 C21 1.695(11) . ? 
C21 H21 0.9800 . ? 
 
loop_ 
 _geom_angle_atom_site_label_1 
 _geom_angle_atom_site_label_2 
 _geom_angle_atom_site_label_3 
 _geom_angle 
 _geom_angle_site_symmetry_1 
 _geom_angle_site_symmetry_3 
 _geom_angle_publ_flag 
C2 C1 I001 172.8(8) . . ? 
C1 C2 C3 178.4(9) . . ? 
C4 C3 C8 115.6(7) . . ? 
C4 C3 C2 120.3(7) . . ? 
C8 C3 C2 124.0(7) . . ? 
F1 C4 C3 118.2(7) . . ? 
F1 C4 C5 117.5(7) . . ? 
C3 C4 C5 124.3(7) . . ? 
C6 C5 C4 115.3(7) . . ? 
C6 C5 C10 122.5(7) . . ? 
C4 C5 C10 122.0(7) . . ? 
F2 C6 C5 117.6(7) . . ? 
F2 C6 C7 117.6(7) . . ? 
C5 C6 C7 124.7(7) . . ? 
C8 C7 C6 115.8(7) . . ? 
C8 C7 C12 121.7(7) . . ? 
C6 C7 C12 122.2(7) . . ? 
F3 C8 C7 118.8(7) . . ? 
F3 C8 C3 116.8(7) . . ? 
C7 C8 C3 124.4(7) . . ? 
C10 C9 I002 176.8(8) . . ? 
C9 C10 C5 174.1(9) . . ? 
C12 C11 I003 175.2(8) . . ? 
C11 C12 C7 175.7(9) . . ? 
C17 N1 C13 108.9(9) . . ? 
C17 N1 C15 112.9(11) . . ? 
C13 N1 C15 109.3(10) . . ? 
C17 N1 C19 109.9(10) . . ? 
C13 N1 C19 111.4(9) . . ? 
C15 N1 C19 104.4(10) . . ? 
N1 C13 C14 116.2(11) . . ? 
N1 C13 H13A 108.2 . . ? 
C14 C13 H13A 108.2 . . ? 
N1 C13 H13B 108.2 . . ? 
C14 C13 H13B 108.2 . . ? 
H13A C13 H13B 107.4 . . ? 
C13 C14 H14A 109.5 . . ? 
C13 C14 H14B 109.5 . . ? 
H14A C14 H14B 109.5 . . ? 
C13 C14 H14C 109.5 . . ? 
H14A C14 H14C 109.5 . . ? 
H14B C14 H14C 109.5 . . ? 
C16 C15 N1 112.9(14) . . ? 
C16 C15 H15A 109.0 . . ? 
N1 C15 H15A 109.0 . . ? 
C16 C15 H15B 109.0 . . ? 
N1 C15 H15B 109.0 . . ? 
H15A C15 H15B 107.8 . . ? 
C15 C16 H16A 109.5 . . ? 
C15 C16 H16B 109.5 . . ? 
H16A C16 H16B 109.5 . . ? 
C15 C16 H16C 109.5 . . ? 
H16A C16 H16C 109.5 . . ? 
H16B C16 H16C 109.5 . . ? 
N1 C17 C18 113.9(11) . . ? 
N1 C17 H17A 108.8 . . ? 
C18 C17 H17A 108.8 . . ? 
N1 C17 H17B 108.8 . . ? 
C18 C17 H17B 108.8 . . ? 
H17A C17 H17B 107.7 . . ? 
C17 C18 H18A 109.5 . . ? 
C17 C18 H18B 109.5 . . ? 
H18A C18 H18B 109.5 . . ? 
C17 C18 H18C 109.5 . . ? 
H18A C18 H18C 109.5 . . ? 
H18B C18 H18C 109.5 . . ? 
C20 C19 N1 115.0(14) . . ? 
C20 C19 H19A 108.5 . . ? 
N1 C19 H19A 108.5 . . ? 
C20 C19 H19B 108.5 . . ? 
N1 C19 H19B 108.5 . . ? 
H19A C19 H19B 107.5 . . ? 
C19 C20 H20A 109.5 . . ? 
C19 C20 H20B 109.5 . . ? 
H20A C20 H20B 109.5 . . ? 
C19 C20 H20C 109.5 . . ? 
H20A C20 H20C 109.5 . . ? 
H20B C20 H20C 109.5 . . ? 
Cl2 C21 Cl3 114.2(7) . . ? 
Cl2 C21 Cl1 106.1(6) . . ? 
Cl3 C21 Cl1 110.6(8) . . ? 
Cl2 C21 H21 108.6 . . ? 
Cl3 C21 H21 108.6 . . ? 
Cl1 C21 H21 108.6 . . ? 
 
loop_ 
 _geom_torsion_atom_site_label_1 
 _geom_torsion_atom_site_label_2 
 _geom_torsion_atom_site_label_3 
 _geom_torsion_atom_site_label_4 
 _geom_torsion 
 _geom_torsion_site_symmetry_1 
 _geom_torsion_site_symmetry_2 
 _geom_torsion_site_symmetry_3 
 _geom_torsion_site_symmetry_4 
 _geom_torsion_publ_flag 
I001 C1 C2 C3 -20(42) . . . . ? 
C1 C2 C3 C4 -51(37) . . . . ? 
C1 C2 C3 C8 125(37) . . . . ? 
C8 C3 C4 F1 -179.3(7) . . . . ? 
C2 C3 C4 F1 -3.0(11) . . . . ? 
C8 C3 C4 C5 -0.5(12) . . . . ? 
C2 C3 C4 C5 175.8(7) . . . . ? 
F1 C4 C5 C6 -179.9(7) . . . . ? 
C3 C4 C5 C6 1.3(12) . . . . ? 
F1 C4 C5 C10 4.9(12) . . . . ? 
C3 C4 C5 C10 -173.9(8) . . . . ? 
C4 C5 C6 F2 -179.1(7) . . . . ? 
C10 C5 C6 F2 -3.9(12) . . . . ? 
C4 C5 C6 C7 -1.2(12) . . . . ? 
C10 C5 C6 C7 174.0(8) . . . . ? 
F2 C6 C7 C8 178.1(7) . . . . ? 
C5 C6 C7 C8 0.3(12) . . . . ? 
F2 C6 C7 C12 4.1(12) . . . . ? 
C5 C6 C7 C12 -173.7(8) . . . . ? 
C6 C7 C8 F3 -177.8(7) . . . . ? 
C12 C7 C8 F3 -3.8(11) . . . . ? 
C6 C7 C8 C3 0.7(12) . . . . ? 
C12 C7 C8 C3 174.7(8) . . . . ? 
C4 C3 C8 F3 177.9(7) . . . . ? 
C2 C3 C8 F3 1.8(12) . . . . ? 
C4 C3 C8 C7 -0.6(12) . . . . ? 
C2 C3 C8 C7 -176.7(7) . . . . ? 
I002 C9 C10 C5 -27(21) . . . . ? 
C6 C5 C10 C9 -75(9) . . . . ? 
C4 C5 C10 C9 99(9) . . . . ? 
I003 C11 C12 C7 1(20) . . . . ? 
C8 C7 C12 C11 -60(12) . . . . ? 
C6 C7 C12 C11 113(12) . . . . ? 
C17 N1 C13 C14 -179.5(13) . . . . ? 
C15 N1 C13 C14 56.8(16) . . . . ? 
C19 N1 C13 C14 -58.1(15) . . . . ? 
C17 N1 C15 C16 -64.9(16) . . . . ? 
C13 N1 C15 C16 56.4(16) . . . . ? 
C19 N1 C15 C16 175.7(13) . . . . ? 
C13 N1 C17 C18 -174.4(12) . . . . ? 
C15 N1 C17 C18 -52.8(16) . . . . ? 
C19 N1 C17 C18 63.3(16) . . . . ? 
C17 N1 C19 C20 60.8(15) . . . . ? 
C13 N1 C19 C20 -60.0(15) . . . . ? 
C15 N1 C19 C20 -177.8(13) . . . . ? 
 
_diffrn_measured_fraction_theta_max    0.997 
_diffrn_reflns_theta_full              27.50 
_diffrn_measured_fraction_theta_full   0.997 
_refine_diff_density_max    1.031 
_refine_diff_density_min   -0.830 
_refine_diff_density_rms    0.120 

#===END


data_1-MeDABCOI 
 
_audit_creation_method            SHELXL-97 
_chemical_name_systematic 
; 
 ? 
; 
_chemical_name_common             ? 
_chemical_melting_point           ? 
_chemical_formula_moiety          
 'C12 F3 I3, C7 H15 N2, C H Cl3, I' 
_chemical_formula_sum 
 'C20 H16 Cl3 F3 I4 N2' 
_chemical_formula_weight          955.30 
 
loop_ 
 _atom_type_symbol 
 _atom_type_description 
 _atom_type_scat_dispersion_real 
 _atom_type_scat_dispersion_imag 
 _atom_type_scat_source 
 'C'  'C'   0.0033   0.0016 
 'International Tables Vol C Tables 4.2.6.8 and 6.1.1.4' 
 'H'  'H'   0.0000   0.0000 
 'International Tables Vol C Tables 4.2.6.8 and 6.1.1.4' 
 'N'  'N'   0.0061   0.0033 
 'International Tables Vol C Tables 4.2.6.8 and 6.1.1.4' 
 'F'  'F'   0.0171   0.0103 
 'International Tables Vol C Tables 4.2.6.8 and 6.1.1.4' 
 'I'  'I'  -0.4742   1.8119 
 'International Tables Vol C Tables 4.2.6.8 and 6.1.1.4' 
 'Cl'  'Cl'   0.1484   0.1585 
 'International Tables Vol C Tables 4.2.6.8 and 6.1.1.4' 
 
_symmetry_cell_setting            monoclinic 
_symmetry_space_group_name_H-M    'P 21/c' 
_symmetry_space_group_name_Hall   '-P 2ybc'
 
loop_ 
 _symmetry_equiv_pos_as_xyz 
 'x, y, z' 
 '-x, y+1/2, -z+1/2' 
 '-x, -y, -z' 
 'x, -y-1/2, z-1/2' 
 
_cell_length_a                    11.5634(2) 
_cell_length_b                    14.1620(3) 
_cell_length_c                    17.1705(3) 
_cell_angle_alpha                 90.00 
_cell_angle_beta                  97.5540(10) 
_cell_angle_gamma                 90.00 
_cell_volume                      2787.45(9) 
_cell_formula_units_Z             4 
_cell_measurement_temperature     293(2) 
_cell_measurement_reflns_used     9068 
_cell_measurement_theta_min       3.5087 
_cell_measurement_theta_max       27.4947   
 
_exptl_crystal_description        prism 
_exptl_crystal_colour             white 
_exptl_crystal_size_max           0.37 
_exptl_crystal_size_mid           0.37
_exptl_crystal_size_min           0.24
_exptl_crystal_density_meas       ? 
_exptl_crystal_density_diffrn     2.276 
_exptl_crystal_density_method     'not measured' 
_exptl_crystal_F_000              1760 
_exptl_absorpt_coefficient_mu     4.791 
_exptl_absorpt_correction_type                              multi-scan
_exptl_absorpt_process_details
;
  [Sheldrick, G.M. (2002). SADABS Bruker AXS Inc., Madison, Wisconsin, USA]
;
_exptl_absorpt_correction_T_min         0.195
_exptl_absorpt_correction_T_max         0.317
     
#----------------------------- Remark --------------------------------#
# SADABS output:                                                          #
# Estimated minimum and maximum transmission:  0.5023  0.7456   #
# The ratio of these values is more reliable than their absolute values!  #
#--------------------------------------------------------------------#

_exptl_special_details 
; 
 ? 
; 
 
_diffrn_ambient_temperature       293(2)
_diffrn_radiation_wavelength      0.71073
_diffrn_radiation_type            MoK\a
_diffrn_radiation_source          'fine-focus sealed tube'
_diffrn_measurement_device_type   'KappaCCD'
_diffrn_measurement_device        '95mm CCD camera on \k-goniostat'
_diffrn_detector_area_resol_mean  9
_diffrn_radiation_monochromator   'horizonally mounted graphite crystal'
_diffrn_measurement_method        'CCD'
_diffrn_standards_number          ? 
_diffrn_standards_interval_count  ? 
_diffrn_standards_interval_time   ? 
_diffrn_standards_decay_%         ? 
_diffrn_reflns_number             50864 
_diffrn_reflns_av_R_equivalents   0.0469 
_diffrn_reflns_av_sigmaI/netI     0.0258 
_diffrn_reflns_limit_h_min        -15 
_diffrn_reflns_limit_h_max        15 
_diffrn_reflns_limit_k_min        -18 
_diffrn_reflns_limit_k_max        18 
_diffrn_reflns_limit_l_min        -22 
_diffrn_reflns_limit_l_max        20 
_diffrn_reflns_theta_min          3.51 
_diffrn_reflns_theta_max          27.49 
_reflns_number_total              6385 
_reflns_number_gt                 4609 
_reflns_threshold_expression      >2sigma(I) 
 
_computing_data_collection        'Collect (Bruker AXS BV, 1997-2004)'
_computing_cell_refinement        'Dirax/lsq (Duisenberg & Schreurs, 1989-2000)'
_computing_data_reduction         'EvalCCD (Duisenberg & Schreurs 1990-2000)'
_computing_structure_solution     'SIR92 (Altomare et al., 1993)'
_computing_structure_refinement   'SHELXL-97 (Sheldrick, 1997)'
_computing_molecular_graphics     'Ortep-3 for Windows (Farrugia, 1997)'
_computing_publication_material   'WinGX publication routines (Farrugia, 1999)'
 
_refine_special_details 
; 
 Refinement of F^2^ against ALL reflections.  The weighted R-factor wR and 
 goodness of fit S are based on F^2^, conventional R-factors R are based 
 on F, with F set to zero for negative F^2^. The threshold expression of 
 F^2^ > 2sigma(F^2^) is used only for calculating R-factors(gt) etc. and is 
 not relevant to the choice of reflections for refinement.  R-factors based 
 on F^2^ are statistically about twice as large as those based on F, and R- 
 factors based on ALL data will be even larger. 
; 
 
_refine_ls_structure_factor_coef  Fsqd  
_refine_ls_matrix_type            full 
_refine_ls_weighting_scheme       calc  
_refine_ls_weighting_details 
 'calc w=1/[\s^2^(Fo^2^)+(0.0271P)^2^+11.4411P] where P=(Fo^2^+2Fc^2^)/3' 
_atom_sites_solution_primary      direct 
_atom_sites_solution_secondary    difmap 
_atom_sites_solution_hydrogens    geom 
_refine_ls_hydrogen_treatment     constr 
_refine_ls_extinction_method      none 
_refine_ls_extinction_coef        ? 
_refine_ls_number_reflns          6385 
_refine_ls_number_parameters      289 
_refine_ls_number_restraints      0 
_refine_ls_R_factor_all           0.0671 
_refine_ls_R_factor_gt            0.0374 
_refine_ls_wR_factor_ref          0.0954 
_refine_ls_wR_factor_gt           0.0770 
_refine_ls_goodness_of_fit_ref    1.165 
_refine_ls_restrained_S_all       1.165 
_refine_ls_shift/su_max           0.002 
_refine_ls_shift/su_mean          0.000 
 
loop_ 
 _atom_site_label 
 _atom_site_type_symbol 
 _atom_site_fract_x 
 _atom_site_fract_y 
 _atom_site_fract_z 
 _atom_site_U_iso_or_equiv 
 _atom_site_adp_type 
 _atom_site_occupancy 
 _atom_site_symmetry_multiplicity 
 _atom_site_calc_flag 
 _atom_site_refinement_flags 
 _atom_site_disorder_assembly 
 _atom_site_disorder_group 
I001 I 0.69149(3) 0.58320(3) 0.31847(2) 0.04466(11) Uani 1 1 d . . . 
I002 I 0.68193(4) 1.26465(3) 0.30636(3) 0.04886(12) Uani 1 1 d . . . 
I003 I 0.04975(4) 0.95277(3) 0.61906(3) 0.04962(12) Uani 1 1 d . . . 
F1 F 0.6229(3) 0.9262(3) 0.3406(2) 0.0605(11) Uani 1 1 d . . . 
F2 F 0.3245(3) 1.0901(2) 0.4419(2) 0.0526(9) Uani 1 1 d . . . 
F3 F 0.3446(3) 0.7597(3) 0.4599(2) 0.0565(10) Uani 1 1 d . . . 
C1 C 0.5934(5) 0.6876(5) 0.3572(4) 0.0459(14) Uani 1 1 d . . . 
C2 C 0.5411(6) 0.7524(4) 0.3791(3) 0.0436(14) Uani 1 1 d . . . 
C3 C 0.4849(5) 0.8385(4) 0.3968(3) 0.0375(12) Uani 1 1 d . . . 
C4 C 0.5255(5) 0.9256(4) 0.3755(3) 0.0408(13) Uani 1 1 d . . . 
C5 C 0.4749(5) 1.0122(4) 0.3877(3) 0.0368(12) Uani 1 1 d . . . 
C6 C 0.3754(5) 1.0079(4) 0.4271(3) 0.0355(12) Uani 1 1 d . . . 
C7 C 0.3318(5) 0.9245(4) 0.4535(3) 0.0350(12) Uani 1 1 d . . . 
C8 C 0.3874(5) 0.8415(4) 0.4360(3) 0.0352(12) Uani 1 1 d . . . 
C9 C 0.5770(5) 1.1622(5) 0.3419(4) 0.0459(14) Uani 1 1 d . . . 
C10 C 0.5241(6) 1.0984(4) 0.3638(4) 0.0433(14) Uani 1 1 d . . . 
C11 C 0.1648(5) 0.9304(4) 0.5426(4) 0.0434(14) Uani 1 1 d . . . 
C12 C 0.2362(5) 0.9256(4) 0.4999(4) 0.0398(13) Uani 1 1 d . . . 
N1 N 0.7581(4) 0.8562(4) 0.1265(3) 0.0456(12) Uani 1 1 d . . . 
N2 N 0.6084(5) 0.9877(5) 0.0930(3) 0.0580(15) Uani 1 1 d . . . 
C13 C 0.8443(6) 0.7781(6) 0.1473(5) 0.065(2) Uani 1 1 d . . . 
H13A H 0.8560 0.7441 0.1007 0.098 Uiso 1 1 calc R . . 
H13B H 0.8149 0.7359 0.1839 0.098 Uiso 1 1 calc R . . 
H13C H 0.9171 0.8044 0.1708 0.098 Uiso 1 1 calc R . . 
C14 C 0.7991(9) 0.9239(7) 0.0687(7) 0.103(4) Uani 1 1 d . . . 
H14A H 0.8108 0.8909 0.0209 0.124 Uiso 1 1 calc R . . 
H14B H 0.8725 0.9522 0.0907 0.124 Uiso 1 1 calc R . . 
C15 C 0.7042(10) 1.0018(8) 0.0504(7) 0.113(4) Uani 1 1 d . . . 
H15A H 0.7386 1.0631 0.0636 0.136 Uiso 1 1 calc R . . 
H15B H 0.6764 1.0016 -0.0055 0.136 Uiso 1 1 calc R . . 
C16 C 0.7411(12) 0.9084(10) 0.1968(5) 0.140(6) Uani 1 1 d . . . 
H16A H 0.8147 0.9350 0.2206 0.168 Uiso 1 1 calc R . . 
H16B H 0.7122 0.8666 0.2346 0.168 Uiso 1 1 calc R . . 
C17 C 0.6515(12) 0.9889(10) 0.1736(6) 0.146(7) Uani 1 1 d . . . 
H17A H 0.5868 0.9823 0.2039 0.175 Uiso 1 1 calc R . . 
H17B H 0.6885 1.0493 0.1868 0.175 Uiso 1 1 calc R . . 
C18 C 0.6461(8) 0.8180(7) 0.0899(9) 0.132(6) Uani 1 1 d . . . 
H18A H 0.6155 0.7744 0.1257 0.159 Uiso 1 1 calc R . . 
H18B H 0.6572 0.7838 0.0425 0.159 Uiso 1 1 calc R . . 
C19 C 0.5591(8) 0.8994(7) 0.0696(9) 0.126(5) Uani 1 1 d . . . 
H19A H 0.5345 0.9000 0.0133 0.151 Uiso 1 1 calc R . . 
H19B H 0.4905 0.8888 0.0955 0.151 Uiso 1 1 calc R . . 
I004 I 0.12636(4) 0.92884(3) 0.25372(3) 0.05278(13) Uani 1 1 d . . . 
C20 C 0.0273(7) 0.7610(6) 0.9148(5) 0.068(2) Uani 1 1 d . . . 
H20 H 0.0803 0.7084 0.9085 0.081 Uiso 1 1 calc R . . 
Cl1 Cl 0.0756(2) 0.8162(2) 1.00424(15) 0.0924(7) Uani 1 1 d . . . 
Cl2 Cl -0.1126(2) 0.71388(16) 0.91770(16) 0.0865(7) Uani 1 1 d . . . 
Cl3 Cl 0.0299(3) 0.8359(2) 0.83603(16) 0.1026(9) Uani 1 1 d . . . 
 
loop_ 
 _atom_site_aniso_label 
 _atom_site_aniso_U_11 
 _atom_site_aniso_U_22 
 _atom_site_aniso_U_33 
 _atom_site_aniso_U_23 
 _atom_site_aniso_U_13 
 _atom_site_aniso_U_12 
I001 0.0429(2) 0.0423(2) 0.0491(2) -0.00457(18) 0.00742(17) 0.00527(17) 
I002 0.0482(2) 0.0450(2) 0.0531(2) 0.01040(19) 0.00553(18) -0.00742(18) 
I003 0.0418(2) 0.0571(3) 0.0526(2) 0.0008(2) 0.01631(18) 0.00292(19) 
F1 0.057(2) 0.062(3) 0.070(3) 0.007(2) 0.039(2) 0.0032(19) 
F2 0.053(2) 0.0329(19) 0.073(3) 0.0001(17) 0.0132(19) 0.0068(16) 
F3 0.061(2) 0.037(2) 0.076(3) 0.0033(18) 0.027(2) -0.0053(17) 
C1 0.044(3) 0.045(4) 0.050(4) -0.002(3) 0.006(3) 0.006(3) 
C2 0.054(4) 0.040(3) 0.039(3) -0.001(3) 0.012(3) 0.004(3) 
C3 0.041(3) 0.037(3) 0.035(3) -0.003(2) 0.006(2) -0.001(2) 
C4 0.039(3) 0.049(4) 0.036(3) 0.003(3) 0.010(2) -0.003(3) 
C5 0.038(3) 0.037(3) 0.034(3) 0.003(2) 0.001(2) -0.004(2) 
C6 0.031(3) 0.037(3) 0.038(3) -0.001(2) 0.002(2) 0.005(2) 
C7 0.029(3) 0.040(3) 0.036(3) 0.002(2) 0.004(2) -0.001(2) 
C8 0.040(3) 0.029(3) 0.036(3) 0.004(2) 0.007(2) -0.001(2) 
C9 0.045(3) 0.041(4) 0.050(4) 0.010(3) 0.002(3) -0.003(3) 
C10 0.049(4) 0.041(4) 0.037(3) 0.005(3) -0.002(3) -0.002(3) 
C11 0.039(3) 0.042(3) 0.050(4) 0.001(3) 0.009(3) 0.003(3) 
C12 0.031(3) 0.040(3) 0.047(3) 0.001(3) 0.004(2) -0.001(2) 
N1 0.039(3) 0.045(3) 0.052(3) 0.001(2) 0.005(2) 0.003(2) 
N2 0.058(4) 0.062(4) 0.054(4) 0.001(3) 0.009(3) 0.011(3) 
C13 0.052(4) 0.061(5) 0.081(5) 0.007(4) 0.006(4) 0.016(4) 
C14 0.094(7) 0.093(7) 0.135(9) 0.042(7) 0.059(7) 0.032(6) 
C15 0.123(9) 0.087(7) 0.138(10) 0.053(7) 0.053(8) 0.044(7) 
C16 0.178(12) 0.193(13) 0.044(5) -0.026(6) -0.009(6) 0.127(11) 
C17 0.187(13) 0.181(13) 0.063(6) -0.033(7) -0.012(7) 0.137(11) 
C18 0.053(5) 0.054(6) 0.272(17) 0.006(8) -0.046(7) -0.002(4) 
C19 0.058(6) 0.069(7) 0.238(15) 0.025(8) -0.033(7) -0.002(5) 
I004 0.0447(2) 0.0501(3) 0.0672(3) -0.0002(2) 0.0212(2) 0.00034(19) 
C20 0.059(5) 0.057(5) 0.088(6) 0.006(4) 0.012(4) 0.016(4) 
Cl1 0.0706(14) 0.121(2) 0.0862(16) -0.0044(15) 0.0114(12) -0.0020(14) 
Cl2 0.0845(15) 0.0579(13) 0.1177(19) 0.0018(12) 0.0161(14) 0.0001(11) 
Cl3 0.1057(19) 0.105(2) 0.0934(18) 0.0311(15) -0.0007(14) -0.0197(16) 
 
_geom_special_details 
; 
 All esds (except the esd in the dihedral angle between two l.s. planes) 
 are estimated using the full covariance matrix.  The cell esds are taken 
 into account individually in the estimation of esds in distances, angles 
 and torsion angles; correlations between esds in cell parameters are only 
 used when they are defined by crystal symmetry.  An approximate (isotropic) 
 treatment of cell esds is used for estimating esds involving l.s. planes. 
; 
 
loop_ 
 _geom_bond_atom_site_label_1 
 _geom_bond_atom_site_label_2 
 _geom_bond_distance 
 _geom_bond_site_symmetry_2 
 _geom_bond_publ_flag 
I001 C1 2.028(6) . ? 
I002 C9 2.036(6) . ? 
I003 C11 2.013(6) . ? 
F1 C4 1.343(6) . ? 
F2 C6 1.343(6) . ? 
F3 C8 1.344(6) . ? 
C1 C2 1.186(8) . ? 
C2 C3 1.434(8) . ? 
C3 C4 1.386(8) . ? 
C3 C8 1.387(8) . ? 
C4 C5 1.386(8) . ? 
C5 C6 1.411(8) . ? 
C5 C10 1.430(8) . ? 
C6 C7 1.384(8) . ? 
C7 C8 1.392(8) . ? 
C7 C12 1.444(8) . ? 
C9 C10 1.180(8) . ? 
C11 C12 1.177(8) . ? 
N1 C16 1.450(10) . ? 
N1 C18 1.466(10) . ? 
N1 C13 1.500(8) . ? 
N1 C14 1.501(10) . ? 
N2 C17 1.408(11) . ? 
N2 C19 1.412(12) . ? 
N2 C15 1.419(11) . ? 
C13 H13A 0.9600 . ? 
C13 H13B 0.9600 . ? 
C13 H13C 0.9600 . ? 
C14 C15 1.559(12) . ? 
C14 H14A 0.9700 . ? 
C14 H14B 0.9700 . ? 
C15 H15A 0.9700 . ? 
C15 H15B 0.9700 . ? 
C16 C17 1.556(13) . ? 
C16 H16A 0.9700 . ? 
C16 H16B 0.9700 . ? 
C17 H17A 0.9700 . ? 
C17 H17B 0.9700 . ? 
C18 C19 1.539(12) . ? 
C18 H18A 0.9700 . ? 
C18 H18B 0.9700 . ? 
C19 H19A 0.9700 . ? 
C19 H19B 0.9700 . ? 
C20 Cl3 1.722(8) . ? 
C20 Cl1 1.748(9) . ? 
C20 Cl2 1.757(8) . ? 
C20 H20 0.9800 . ? 
 
loop_ 
 _geom_angle_atom_site_label_1 
 _geom_angle_atom_site_label_2 
 _geom_angle_atom_site_label_3 
 _geom_angle 
 _geom_angle_site_symmetry_1 
 _geom_angle_site_symmetry_3 
 _geom_angle_publ_flag 
C2 C1 I001 176.1(6) . . ? 
C1 C2 C3 171.6(7) . . ? 
C4 C3 C8 115.2(5) . . ? 
C4 C3 C2 121.5(5) . . ? 
C8 C3 C2 123.3(5) . . ? 
F1 C4 C5 117.2(5) . . ? 
F1 C4 C3 117.2(5) . . ? 
C5 C4 C3 125.6(5) . . ? 
C4 C5 C6 115.0(5) . . ? 
C4 C5 C10 121.3(5) . . ? 
C6 C5 C10 123.7(5) . . ? 
F2 C6 C7 119.4(5) . . ? 
F2 C6 C5 117.3(5) . . ? 
C7 C6 C5 123.3(5) . . ? 
C6 C7 C8 116.9(5) . . ? 
C6 C7 C12 120.6(5) . . ? 
C8 C7 C12 122.5(5) . . ? 
F3 C8 C3 118.5(5) . . ? 
F3 C8 C7 117.6(5) . . ? 
C3 C8 C7 123.9(5) . . ? 
C10 C9 I002 174.6(6) . . ? 
C9 C10 C5 171.1(7) . . ? 
C12 C11 I003 173.6(6) . . ? 
C11 C12 C7 174.2(7) . . ? 
C16 N1 C18 109.7(9) . . ? 
C16 N1 C13 109.6(6) . . ? 
C18 N1 C13 110.6(6) . . ? 
C16 N1 C14 108.2(9) . . ? 
C18 N1 C14 106.8(8) . . ? 
C13 N1 C14 111.8(6) . . ? 
C17 N2 C19 111.6(10) . . ? 
C17 N2 C15 107.8(9) . . ? 
C19 N2 C15 106.9(9) . . ? 
N1 C13 H13A 109.5 . . ? 
N1 C13 H13B 109.5 . . ? 
H13A C13 H13B 109.5 . . ? 
N1 C13 H13C 109.5 . . ? 
H13A C13 H13C 109.5 . . ? 
H13B C13 H13C 109.5 . . ? 
N1 C14 C15 108.1(7) . . ? 
N1 C14 H14A 110.1 . . ? 
C15 C14 H14A 110.1 . . ? 
N1 C14 H14B 110.1 . . ? 
C15 C14 H14B 110.1 . . ? 
H14A C14 H14B 108.4 . . ? 
N2 C15 C14 111.9(8) . . ? 
N2 C15 H15A 109.2 . . ? 
C14 C15 H15A 109.2 . . ? 
N2 C15 H15B 109.2 . . ? 
C14 C15 H15B 109.2 . . ? 
H15A C15 H15B 107.9 . . ? 
N1 C16 C17 108.6(7) . . ? 
N1 C16 H16A 110.0 . . ? 
C17 C16 H16A 110.0 . . ? 
N1 C16 H16B 110.0 . . ? 
C17 C16 H16B 110.0 . . ? 
H16A C16 H16B 108.3 . . ? 
N2 C17 C16 112.4(7) . . ? 
N2 C17 H17A 109.1 . . ? 
C16 C17 H17A 109.1 . . ? 
N2 C17 H17B 109.1 . . ? 
C16 C17 H17B 109.1 . . ? 
H17A C17 H17B 107.9 . . ? 
N1 C18 C19 109.6(7) . . ? 
N1 C18 H18A 109.7 . . ? 
C19 C18 H18A 109.7 . . ? 
N1 C18 H18B 109.7 . . ? 
C19 C18 H18B 109.7 . . ? 
H18A C18 H18B 108.2 . . ? 
N2 C19 C18 111.8(7) . . ? 
N2 C19 H19A 109.3 . . ? 
C18 C19 H19A 109.3 . . ? 
N2 C19 H19B 109.3 . . ? 
C18 C19 H19B 109.3 . . ? 
H19A C19 H19B 107.9 . . ? 
Cl3 C20 Cl1 112.2(5) . . ? 
Cl3 C20 Cl2 111.6(5) . . ? 
Cl1 C20 Cl2 109.5(5) . . ? 
Cl3 C20 H20 107.8 . . ? 
Cl1 C20 H20 107.8 . . ? 
Cl2 C20 H20 107.8 . . ? 
 
loop_ 
 _geom_torsion_atom_site_label_1 
 _geom_torsion_atom_site_label_2 
 _geom_torsion_atom_site_label_3 
 _geom_torsion_atom_site_label_4 
 _geom_torsion 
 _geom_torsion_site_symmetry_1 
 _geom_torsion_site_symmetry_2 
 _geom_torsion_site_symmetry_3 
 _geom_torsion_site_symmetry_4 
 _geom_torsion_publ_flag 
I001 C1 C2 C3 36(12) . . . . ? 
C1 C2 C3 C4 -21(5) . . . . ? 
C1 C2 C3 C8 159(5) . . . . ? 
C8 C3 C4 F1 177.1(5) . . . . ? 
C2 C3 C4 F1 -2.9(9) . . . . ? 
C8 C3 C4 C5 -2.3(9) . . . . ? 
C2 C3 C4 C5 177.7(6) . . . . ? 
F1 C4 C5 C6 -177.7(5) . . . . ? 
C3 C4 C5 C6 1.7(9) . . . . ? 
F1 C4 C5 C10 0.2(8) . . . . ? 
C3 C4 C5 C10 179.6(6) . . . . ? 
C4 C5 C6 F2 178.6(5) . . . . ? 
C10 C5 C6 F2 0.7(8) . . . . ? 
C4 C5 C6 C7 1.2(8) . . . . ? 
C10 C5 C6 C7 -176.7(5) . . . . ? 
F2 C6 C7 C8 179.5(5) . . . . ? 
C5 C6 C7 C8 -3.2(8) . . . . ? 
F2 C6 C7 C12 -3.1(8) . . . . ? 
C5 C6 C7 C12 174.2(5) . . . . ? 
C4 C3 C8 F3 -178.7(5) . . . . ? 
C2 C3 C8 F3 1.3(9) . . . . ? 
C4 C3 C8 C7 0.1(9) . . . . ? 
C2 C3 C8 C7 -179.9(6) . . . . ? 
C6 C7 C8 F3 -178.7(5) . . . . ? 
C12 C7 C8 F3 3.9(8) . . . . ? 
C6 C7 C8 C3 2.5(9) . . . . ? 
C12 C7 C8 C3 -174.9(6) . . . . ? 
I002 C9 C10 C5 -22(10) . . . . ? 
C4 C5 C10 C9 -8(5) . . . . ? 
C6 C5 C10 C9 170(4) . . . . ? 
I003 C11 C12 C7 39(11) . . . . ? 
C6 C7 C12 C11 -66(7) . . . . ? 
C8 C7 C12 C11 111(7) . . . . ? 
C16 N1 C14 C15 -59.4(12) . . . . ? 
C18 N1 C14 C15 58.6(11) . . . . ? 
C13 N1 C14 C15 179.7(9) . . . . ? 
C17 N2 C15 C14 59.2(13) . . . . ? 
C19 N2 C15 C14 -61.0(13) . . . . ? 
N1 C14 C15 N2 0.5(14) . . . . ? 
C18 N1 C16 C17 -58.3(14) . . . . ? 
C13 N1 C16 C17 180.0(11) . . . . ? 
C14 N1 C16 C17 57.8(14) . . . . ? 
C19 N2 C17 C16 55.6(15) . . . . ? 
C15 N2 C17 C16 -61.5(15) . . . . ? 
N1 C16 C17 N2 2.1(18) . . . . ? 
C16 N1 C18 C19 58.6(14) . . . . ? 
C13 N1 C18 C19 179.7(10) . . . . ? 
C14 N1 C18 C19 -58.5(13) . . . . ? 
C17 N2 C19 C18 -55.7(14) . . . . ? 
C15 N2 C19 C18 62.0(14) . . . . ? 
N1 C18 C19 N2 -1.4(17) . . . . ? 
 
_diffrn_measured_fraction_theta_max    0.998 
_diffrn_reflns_theta_full              27.49 
_diffrn_measured_fraction_theta_full   0.998 
_refine_diff_density_max    1.151 
_refine_diff_density_min   -1.440 
_refine_diff_density_rms    0.169 

#===END


data_1-Bu3SI
 
_audit_creation_method            SHELXL-97
_chemical_name_systematic
;
 ?
;
_chemical_name_common             ?
_chemical_melting_point           ?
_chemical_formula_moiety          
 'C12 F3 I3, C12 H27 S, I'
_chemical_formula_sum
 'C24 H27 F3 I4 S'
_chemical_formula_weight          912.12
 
loop_
 _atom_type_symbol
 _atom_type_description
 _atom_type_scat_dispersion_real
 _atom_type_scat_dispersion_imag
 _atom_type_scat_source
 'C'  'C'   0.0033   0.0016
 'International Tables Vol C Tables 4.2.6.8 and 6.1.1.4'
 'H'  'H'   0.0000   0.0000
 'International Tables Vol C Tables 4.2.6.8 and 6.1.1.4'
 'F'  'F'   0.0171   0.0103
 'International Tables Vol C Tables 4.2.6.8 and 6.1.1.4'
 'S'  'S'   0.1246   0.1234
 'International Tables Vol C Tables 4.2.6.8 and 6.1.1.4'
 'I'  'I'  -0.4742   1.8119
 'International Tables Vol C Tables 4.2.6.8 and 6.1.1.4'
 
_symmetry_cell_setting                  'monoclinic'
_symmetry_space_group_name_H-M          'P 21/n'
_symmetry_space_group_name_Hall   '-P 2yn'

 
loop_
 _symmetry_equiv_pos_as_xyz
 'x, y, z'
 '-x+1/2, y+1/2, -z+1/2'
 '-x, -y, -z'
 'x-1/2, -y-1/2, z-1/2'
 
_cell_length_a                    8.6022(2)
_cell_length_b                    26.1613(7)
_cell_length_c                    13.6072(3)
_cell_angle_alpha                 90.00
_cell_angle_beta                  90.2730(10)
_cell_angle_gamma                 90.00
_cell_volume                      3062.19(13)
_cell_formula_units_Z             4
_cell_measurement_temperature         150(2)
_cell_measurement_reflns_used            9942
_cell_measurement_theta_min              2.49
_cell_measurement_theta_max             27.46
 
_exptl_crystal_description             prism
_exptl_crystal_colour                  colourless
_exptl_crystal_size_max                0.23
_exptl_crystal_size_mid                0.12
_exptl_crystal_size_min                0.05
_exptl_crystal_density_meas       ?
_exptl_crystal_density_diffrn     1.978
_exptl_crystal_density_method     'not measured'
_exptl_crystal_F_000              1704
_exptl_absorpt_coefficient_mu     4.167
_exptl_absorpt_correction_type                              multi-scan
_exptl_absorpt_process_details
;
  [Sheldrick, G.M. (2002). SADABS Bruker AXS Inc., Madison, Wisconsin, USA]
;
_exptl_absorpt_correction_T_min                      0.554
_exptl_absorpt_correction_T_max                      0.812

#----------------------------- Remark ------------------------------------#
# SADABS output:                                                          #
# Estimated minimum and maximum transmission:  0.5745  0.7456             #
# The ratio of these values is more reliable than their absolute values!  #
#-------------------------------------------------------------------------#
 
_exptl_special_details
;
 ?
;
 
_diffrn_ambient_temperature       150(2)
_diffrn_radiation_wavelength      0.71073
_diffrn_radiation_type            MoK\a
_diffrn_radiation_source          'fine-focus sealed tube'
_diffrn_radiation_monochromator   graphite
_diffrn_measurement_device_type   'APEXII, Bruker-AXS'
_diffrn_measurement_method        'CCD rotation images, thin slices'
_diffrn_detector                  'CCD plate'
_diffrn_standards_number          ?
_diffrn_standards_interval_count  ?
_diffrn_standards_interval_time   ?
_diffrn_standards_decay_%         ?
_diffrn_reflns_number             30553
_diffrn_reflns_av_R_equivalents   0.0299
_diffrn_reflns_av_sigmaI/netI     0.0244
_diffrn_reflns_limit_h_min        -7
_diffrn_reflns_limit_h_max        11
_diffrn_reflns_limit_k_min        -33
_diffrn_reflns_limit_k_max        31
_diffrn_reflns_limit_l_min        -17
_diffrn_reflns_limit_l_max        16
_diffrn_reflns_theta_min          1.56
_diffrn_reflns_theta_max          27.54
_reflns_number_total              7021
_reflns_number_gt                 6064
_reflns_threshold_expression      >2sigma(I)
 
_computing_data_collection        'Bruker SMART, 2006'
_computing_cell_refinement        'Bruker SMART, 2006'
_computing_data_reduction         'Bruker SAINT, 2006'
_computing_structure_solution     'SIR97 (Altomare et al., 1999)'
_computing_structure_refinement   'SHELXL-97 (Sheldrick, 1997)'
_computing_molecular_graphics     'Ortep-3 for Windows (Farrugia, 1997)'
_computing_publication_material   'WinGX publication routines (Farrugia, 1999)'
 
_refine_special_details
;
 Refinement of F^2^ against ALL reflections.  The weighted R-factor wR and
 goodness of fit S are based on F^2^, conventional R-factors R are based
 on F, with F set to zero for negative F^2^. The threshold expression of
 F^2^ > 2sigma(F^2^) is used only for calculating R-factors(gt) etc. and is
 not relevant to the choice of reflections for refinement.  R-factors based
 on F^2^ are statistically about twice as large as those based on F, and R-
 factors based on ALL data will be even larger.
;
 
_refine_ls_structure_factor_coef  Fsqd
_refine_ls_matrix_type            full
_refine_ls_weighting_scheme       calc
_refine_ls_weighting_details
 'calc w=1/[\s^2^(Fo^2^)+(0.0326P)^2^+3.9102P] where P=(Fo^2^+2Fc^2^)/3'
_atom_sites_solution_primary      direct
_atom_sites_solution_secondary    difmap
_atom_sites_solution_hydrogens    geom
_refine_ls_hydrogen_treatment     constr
_refine_ls_extinction_method      none
_refine_ls_extinction_coef        ?
_refine_ls_number_reflns          7021
_refine_ls_number_parameters      289
_refine_ls_number_restraints      0
_refine_ls_R_factor_all           0.0334
_refine_ls_R_factor_gt            0.0251
_refine_ls_wR_factor_ref          0.0758
_refine_ls_wR_factor_gt           0.0600
_refine_ls_goodness_of_fit_ref    1.146
_refine_ls_restrained_S_all       1.146
_refine_ls_shift/su_max           0.002
_refine_ls_shift/su_mean          0.000
 
loop_
 _atom_site_label
 _atom_site_type_symbol
 _atom_site_fract_x
 _atom_site_fract_y
 _atom_site_fract_z
 _atom_site_U_iso_or_equiv
 _atom_site_adp_type
 _atom_site_occupancy
 _atom_site_symmetry_multiplicity
 _atom_site_calc_flag
 _atom_site_refinement_flags
 _atom_site_disorder_assembly
 _atom_site_disorder_group
I1 I 0.45165(3) 0.223303(10) 0.440552(19) 0.03606(7) Uani 1 1 d . . .
I2 I 1.13293(3) -0.091566(11) 0.219610(18) 0.03418(7) Uani 1 1 d . . .
I3 I 0.43719(3) -0.109961(12) 0.84512(2) 0.03962(8) Uani 1 1 d . . .
F1 F 0.8285(3) 0.06582(10) 0.35967(18) 0.0425(6) Uani 1 1 d . . .
F2 F 0.8071(3) -0.08424(9) 0.54433(18) 0.0432(6) Uani 1 1 d . . .
F3 F 0.5165(3) 0.05835(10) 0.63992(18) 0.0425(6) Uani 1 1 d . . .
C1 C 0.5646(5) 0.15629(17) 0.4619(3) 0.0384(9) Uani 1 1 d . . .
C2 C 0.6178(5) 0.11542(17) 0.4809(3) 0.0371(9) Uani 1 1 d . . .
C3 C 0.6724(4) 0.06501(15) 0.5002(3) 0.0326(8) Uani 1 1 d . . .
C4 C 0.7744(4) 0.04003(16) 0.4371(3) 0.0325(8) Uani 1 1 d . . .
C5 C 0.8227(4) -0.01022(15) 0.4495(3) 0.0316(8) Uani 1 1 d . . .
C6 C 0.7637(4) -0.03569(15) 0.5306(3) 0.0319(8) Uani 1 1 d . . .
C7 C 0.6611(4) -0.01373(16) 0.5975(3) 0.0319(8) Uani 1 1 d . . .
C8 C 0.6192(4) 0.03614(16) 0.5791(3) 0.0333(8) Uani 1 1 d . . .
C9 C 1.0086(4) -0.05350(16) 0.3216(3) 0.0348(9) Uani 1 1 d . . .
C10 C 0.9234(4) -0.03422(16) 0.3801(3) 0.0338(8) Uani 1 1 d . . .
C11 C 0.5406(5) -0.06768(18) 0.7405(3) 0.0391(9) Uani 1 1 d . . .
C12 C 0.5980(5) -0.04272(17) 0.6774(3) 0.0375(9) Uani 1 1 d . . .
S1 S 0.39890(11) 0.17286(4) 0.78593(7) 0.0351(2) Uani 1 1 d . . .
C13 C 0.4020(5) 0.23982(16) 0.8191(3) 0.0373(9) Uani 1 1 d . . .
H13A H 0.2961 0.2517 0.8277 0.045 Uiso 1 1 calc R . .
H13B H 0.4559 0.2437 0.8815 0.045 Uiso 1 1 calc R . .
C14 C 0.4818(5) 0.27293(18) 0.7421(3) 0.0432(10) Uani 1 1 d . . .
H14A H 0.5853 0.2597 0.7298 0.052 Uiso 1 1 calc R . .
H14B H 0.4234 0.2714 0.6810 0.052 Uiso 1 1 calc R . .
C15 C 0.4933(6) 0.32796(18) 0.7758(4) 0.0491(11) Uani 1 1 d . . .
H15A H 0.3896 0.3407 0.7890 0.059 Uiso 1 1 calc R . .
H15B H 0.5519 0.3292 0.8369 0.059 Uiso 1 1 calc R . .
C16 C 0.5698(7) 0.3623(2) 0.7020(4) 0.0652(15) Uani 1 1 d . . .
H16A H 0.5742 0.3965 0.7274 0.098 Uiso 1 1 calc R . .
H16B H 0.5108 0.3620 0.6419 0.098 Uiso 1 1 calc R . .
H16C H 0.6733 0.3503 0.6895 0.098 Uiso 1 1 calc R . .
C17 C 0.2918(5) 0.14537(17) 0.8869(3) 0.0381(9) Uani 1 1 d . . .
H17A H 0.3336 0.1583 0.9484 0.046 Uiso 1 1 calc R . .
H17B H 0.1839 0.1559 0.8824 0.046 Uiso 1 1 calc R . .
C18 C 0.2999(5) 0.08779(17) 0.8872(3) 0.0416(10) Uani 1 1 d . . .
H18A H 0.4078 0.0772 0.8917 0.050 Uiso 1 1 calc R . .
H18B H 0.2579 0.0749 0.8257 0.050 Uiso 1 1 calc R . .
C19 C 0.2100(6) 0.0647(2) 0.9721(3) 0.0512(12) Uani 1 1 d . . .
H19A H 0.2508 0.0782 1.0334 0.061 Uiso 1 1 calc R . .
H19B H 0.1019 0.0749 0.9668 0.061 Uiso 1 1 calc R . .
C20 C 0.2192(8) 0.0077(2) 0.9745(5) 0.084(2) Uani 1 1 d . . .
H20A H 0.1606 -0.0050 1.0292 0.125 Uiso 1 1 calc R . .
H20B H 0.3258 -0.0027 0.9813 0.125 Uiso 1 1 calc R . .
H20C H 0.1771 -0.0060 0.9146 0.125 Uiso 1 1 calc R . .
C21 C 0.2643(5) 0.16919(17) 0.6834(3) 0.0371(9) Uani 1 1 d . . .
H21A H 0.3219 0.1761 0.6238 0.045 Uiso 1 1 calc R . .
H21B H 0.2270 0.1343 0.6791 0.045 Uiso 1 1 calc R . .
C22 C 0.1247(5) 0.20405(17) 0.6848(3) 0.0390(9) Uani 1 1 d . . .
H22A H 0.1597 0.2393 0.6862 0.047 Uiso 1 1 calc R . .
H22B H 0.0656 0.1978 0.7440 0.047 Uiso 1 1 calc R . .
C23 C 0.0189(5) 0.19597(18) 0.5946(3) 0.0417(10) Uani 1 1 d . . .
H23A H 0.0763 0.2038 0.5353 0.050 Uiso 1 1 calc R . .
H23B H -0.0128 0.1604 0.5914 0.050 Uiso 1 1 calc R . .
C24 C -0.1225(6) 0.2293(2) 0.5996(4) 0.0560(13) Uani 1 1 d . . .
H24A H -0.1866 0.2234 0.5428 0.084 Uiso 1 1 calc R . .
H24B H -0.0914 0.2645 0.6013 0.084 Uiso 1 1 calc R . .
H24C H -0.1801 0.2213 0.6579 0.084 Uiso 1 1 calc R . .
I4 I 0.22769(3) 0.329325(11) 0.457469(19) 0.03699(7) Uani 1 1 d . . .
 
loop_
 _atom_site_aniso_label
 _atom_site_aniso_U_11
 _atom_site_aniso_U_22
 _atom_site_aniso_U_33
 _atom_site_aniso_U_23
 _atom_site_aniso_U_13
 _atom_site_aniso_U_12
I1 0.03199(13) 0.03755(16) 0.03868(14) 0.00725(11) 0.00264(10) 0.00245(10)
I2 0.02849(13) 0.04208(16) 0.03196(13) -0.00146(11) -0.00161(10) -0.00444(10)
I3 0.03428(14) 0.04802(17) 0.03653(14) 0.00710(12) -0.00230(11) -0.00397(11)
F1 0.0414(13) 0.0408(14) 0.0452(13) 0.0080(11) 0.0034(11) -0.0022(10)
F2 0.0455(14) 0.0342(14) 0.0500(14) 0.0040(11) -0.0026(11) 0.0027(10)
F3 0.0304(12) 0.0515(16) 0.0457(13) -0.0072(11) -0.0002(10) 0.0020(10)
C1 0.036(2) 0.038(2) 0.041(2) -0.0006(18) 0.0017(17) 0.0004(17)
C2 0.031(2) 0.040(2) 0.041(2) -0.0027(18) -0.0034(17) -0.0022(17)
C3 0.0257(18) 0.032(2) 0.040(2) -0.0007(16) -0.0087(15) -0.0034(15)
C4 0.0262(18) 0.037(2) 0.0338(19) 0.0028(17) -0.0070(15) -0.0058(15)
C5 0.0236(17) 0.036(2) 0.0351(19) -0.0033(16) -0.0063(15) -0.0056(15)
C6 0.0277(18) 0.029(2) 0.039(2) -0.0022(16) -0.0116(16) -0.0025(14)
C7 0.0252(17) 0.037(2) 0.0337(19) 0.0003(16) -0.0068(15) -0.0079(15)
C8 0.0223(17) 0.041(2) 0.036(2) -0.0074(17) -0.0082(15) -0.0032(15)
C9 0.0300(19) 0.037(2) 0.037(2) -0.0021(17) -0.0040(16) -0.0045(16)
C10 0.0304(19) 0.035(2) 0.036(2) -0.0020(17) -0.0095(16) -0.0068(16)
C11 0.032(2) 0.047(3) 0.038(2) 0.0030(19) -0.0029(17) -0.0020(18)
C12 0.031(2) 0.045(3) 0.037(2) -0.0032(19) -0.0075(17) -0.0038(17)
S1 0.0328(5) 0.0368(6) 0.0357(5) -0.0015(4) -0.0014(4) -0.0020(4)
C13 0.035(2) 0.039(2) 0.038(2) -0.0062(18) -0.0012(17) -0.0010(17)
C14 0.035(2) 0.044(3) 0.050(3) 0.001(2) 0.0050(19) -0.0090(18)
C15 0.055(3) 0.041(3) 0.052(3) -0.003(2) -0.003(2) -0.006(2)
C16 0.064(3) 0.057(3) 0.076(4) 0.007(3) 0.000(3) -0.022(3)
C17 0.038(2) 0.044(3) 0.032(2) -0.0013(18) 0.0009(17) -0.0024(18)
C18 0.037(2) 0.047(3) 0.041(2) 0.0028(19) -0.0078(18) -0.0039(18)
C19 0.050(3) 0.059(3) 0.045(3) 0.012(2) -0.006(2) -0.009(2)
C20 0.091(5) 0.058(4) 0.103(5) 0.036(4) 0.009(4) -0.005(3)
C21 0.039(2) 0.041(2) 0.0309(19) 0.0006(17) -0.0024(17) -0.0044(17)
C22 0.034(2) 0.038(2) 0.045(2) 0.0044(19) -0.0033(18) -0.0046(17)
C23 0.042(2) 0.047(3) 0.036(2) 0.0077(19) -0.0016(18) -0.0054(19)
C24 0.042(3) 0.066(4) 0.060(3) 0.007(3) -0.013(2) 0.003(2)
I4 0.03662(14) 0.03916(16) 0.03517(14) 0.00121(11) -0.00002(11) 0.00583(10)
 
_geom_special_details
;
 All esds (except the esd in the dihedral angle between two l.s. planes)
 are estimated using the full covariance matrix.  The cell esds are taken
 into account individually in the estimation of esds in distances, angles
 and torsion angles; correlations between esds in cell parameters are only
 used when they are defined by crystal symmetry.  An approximate (isotropic)
 treatment of cell esds is used for estimating esds involving l.s. planes.
;
 
loop_
 _geom_bond_atom_site_label_1
 _geom_bond_atom_site_label_2
 _geom_bond_distance
 _geom_bond_site_symmetry_2
 _geom_bond_publ_flag
I1 C1 2.024(4) . ?
I2 C9 2.019(4) . ?
I3 C11 2.013(4) . ?
F1 C4 1.337(4) . ?
F2 C6 1.337(5) . ?
F3 C8 1.346(4) . ?
C1 C2 1.191(6) . ?
C2 C3 1.424(6) . ?
C3 C8 1.392(6) . ?
C3 C4 1.393(6) . ?
C4 C5 1.389(6) . ?
C5 C6 1.388(5) . ?
C5 C10 1.429(6) . ?
C6 C7 1.395(6) . ?
C7 C8 1.376(6) . ?
C7 C12 1.435(6) . ?
C9 C10 1.196(6) . ?
C11 C12 1.188(6) . ?
S1 C17 1.808(4) . ?
S1 C13 1.809(4) . ?
S1 C21 1.811(4) . ?
C13 C14 1.526(6) . ?
C13 H13A 0.9700 . ?
C13 H13B 0.9700 . ?
C14 C15 1.514(6) . ?
C14 H14A 0.9700 . ?
C14 H14B 0.9700 . ?
C15 C16 1.502(7) . ?
C15 H15A 0.9700 . ?
C15 H15B 0.9700 . ?
C16 H16A 0.9600 . ?
C16 H16B 0.9600 . ?
C16 H16C 0.9600 . ?
C17 C18 1.508(6) . ?
C17 H17A 0.9700 . ?
C17 H17B 0.9700 . ?
C18 C19 1.519(6) . ?
C18 H18A 0.9700 . ?
C18 H18B 0.9700 . ?
C19 C20 1.495(8) . ?
C19 H19A 0.9700 . ?
C19 H19B 0.9700 . ?
C20 H20A 0.9600 . ?
C20 H20B 0.9600 . ?
C20 H20C 0.9600 . ?
C21 C22 1.508(6) . ?
C21 H21A 0.9700 . ?
C21 H21B 0.9700 . ?
C22 C23 1.539(6) . ?
C22 H22A 0.9700 . ?
C22 H22B 0.9700 . ?
C23 C24 1.498(6) . ?
C23 H23A 0.9700 . ?
C23 H23B 0.9700 . ?
C24 H24A 0.9600 . ?
C24 H24B 0.9600 . ?
C24 H24C 0.9600 . ?
 
loop_
 _geom_angle_atom_site_label_1
 _geom_angle_atom_site_label_2
 _geom_angle_atom_site_label_3
 _geom_angle
 _geom_angle_site_symmetry_1
 _geom_angle_site_symmetry_3
 _geom_angle_publ_flag
C2 C1 I1 172.8(4) . . ?
C1 C2 C3 176.0(4) . . ?
C8 C3 C4 115.5(4) . . ?
C8 C3 C2 122.3(4) . . ?
C4 C3 C2 122.0(4) . . ?
F1 C4 C5 117.9(4) . . ?
F1 C4 C3 118.1(4) . . ?
C5 C4 C3 124.0(4) . . ?
C6 C5 C4 116.2(4) . . ?
C6 C5 C10 122.6(4) . . ?
C4 C5 C10 121.2(4) . . ?
F2 C6 C5 117.7(3) . . ?
F2 C6 C7 118.5(4) . . ?
C5 C6 C7 123.8(4) . . ?
C8 C7 C6 115.9(4) . . ?
C8 C7 C12 122.7(4) . . ?
C6 C7 C12 121.3(4) . . ?
F3 C8 C7 118.0(4) . . ?
F3 C8 C3 117.4(4) . . ?
C7 C8 C3 124.6(4) . . ?
C10 C9 I2 173.6(4) . . ?
C9 C10 C5 178.9(4) . . ?
C12 C11 I3 178.3(4) . . ?
C11 C12 C7 176.8(4) . . ?
C17 S1 C13 101.7(2) . . ?
C17 S1 C21 103.78(19) . . ?
C13 S1 C21 104.6(2) . . ?
C14 C13 S1 112.6(3) . . ?
C14 C13 H13A 109.1 . . ?
S1 C13 H13A 109.1 . . ?
C14 C13 H13B 109.1 . . ?
S1 C13 H13B 109.1 . . ?
H13A C13 H13B 107.8 . . ?
C15 C14 C13 111.1(4) . . ?
C15 C14 H14A 109.4 . . ?
C13 C14 H14A 109.4 . . ?
C15 C14 H14B 109.4 . . ?
C13 C14 H14B 109.4 . . ?
H14A C14 H14B 108.0 . . ?
C16 C15 C14 113.2(4) . . ?
C16 C15 H15A 108.9 . . ?
C14 C15 H15A 108.9 . . ?
C16 C15 H15B 108.9 . . ?
C14 C15 H15B 108.9 . . ?
H15A C15 H15B 107.8 . . ?
C15 C16 H16A 109.5 . . ?
C15 C16 H16B 109.5 . . ?
H16A C16 H16B 109.5 . . ?
C15 C16 H16C 109.5 . . ?
H16A C16 H16C 109.5 . . ?
H16B C16 H16C 109.5 . . ?
C18 C17 S1 112.0(3) . . ?
C18 C17 H17A 109.2 . . ?
S1 C17 H17A 109.2 . . ?
C18 C17 H17B 109.2 . . ?
S1 C17 H17B 109.2 . . ?
H17A C17 H17B 107.9 . . ?
C17 C18 C19 112.0(4) . . ?
C17 C18 H18A 109.2 . . ?
C19 C18 H18A 109.2 . . ?
C17 C18 H18B 109.2 . . ?
C19 C18 H18B 109.2 . . ?
H18A C18 H18B 107.9 . . ?
C20 C19 C18 112.8(5) . . ?
C20 C19 H19A 109.0 . . ?
C18 C19 H19A 109.0 . . ?
C20 C19 H19B 109.0 . . ?
C18 C19 H19B 109.0 . . ?
H19A C19 H19B 107.8 . . ?
C19 C20 H20A 109.5 . . ?
C19 C20 H20B 109.5 . . ?
H20A C20 H20B 109.5 . . ?
C19 C20 H20C 109.5 . . ?
H20A C20 H20C 109.5 . . ?
H20B C20 H20C 109.5 . . ?
C22 C21 S1 117.7(3) . . ?
C22 C21 H21A 107.9 . . ?
S1 C21 H21A 107.9 . . ?
C22 C21 H21B 107.9 . . ?
S1 C21 H21B 107.9 . . ?
H21A C21 H21B 107.2 . . ?
C21 C22 C23 112.1(4) . . ?
C21 C22 H22A 109.2 . . ?
C23 C22 H22A 109.2 . . ?
C21 C22 H22B 109.2 . . ?
C23 C22 H22B 109.2 . . ?
H22A C22 H22B 107.9 . . ?
C24 C23 C22 111.2(4) . . ?
C24 C23 H23A 109.4 . . ?
C22 C23 H23A 109.4 . . ?
C24 C23 H23B 109.4 . . ?
C22 C23 H23B 109.4 . . ?
H23A C23 H23B 108.0 . . ?
C23 C24 H24A 109.5 . . ?
C23 C24 H24B 109.5 . . ?
H24A C24 H24B 109.5 . . ?
C23 C24 H24C 109.5 . . ?
H24A C24 H24C 109.5 . . ?
H24B C24 H24C 109.5 . . ?
 
loop_
 _geom_torsion_atom_site_label_1
 _geom_torsion_atom_site_label_2
 _geom_torsion_atom_site_label_3
 _geom_torsion_atom_site_label_4
 _geom_torsion
 _geom_torsion_site_symmetry_1
 _geom_torsion_site_symmetry_2
 _geom_torsion_site_symmetry_3
 _geom_torsion_site_symmetry_4
 _geom_torsion_publ_flag
I1 C1 C2 C3 66(8) . . . . ?
C1 C2 C3 C8 -84(7) . . . . ?
C1 C2 C3 C4 91(7) . . . . ?
C8 C3 C4 F1 179.6(3) . . . . ?
C2 C3 C4 F1 4.0(5) . . . . ?
C8 C3 C4 C5 0.0(5) . . . . ?
C2 C3 C4 C5 -175.6(4) . . . . ?
F1 C4 C5 C6 -179.9(3) . . . . ?
C3 C4 C5 C6 -0.3(5) . . . . ?
F1 C4 C5 C10 -1.9(5) . . . . ?
C3 C4 C5 C10 177.7(3) . . . . ?
C4 C5 C6 F2 179.5(3) . . . . ?
C10 C5 C6 F2 1.5(5) . . . . ?
C4 C5 C6 C7 0.3(5) . . . . ?
C10 C5 C6 C7 -177.7(3) . . . . ?
F2 C6 C7 C8 -179.3(3) . . . . ?
C5 C6 C7 C8 -0.1(5) . . . . ?
F2 C6 C7 C12 -2.3(5) . . . . ?
C5 C6 C7 C12 176.9(3) . . . . ?
C6 C7 C8 F3 177.9(3) . . . . ?
C12 C7 C8 F3 1.0(5) . . . . ?
C6 C7 C8 C3 -0.3(5) . . . . ?
C12 C7 C8 C3 -177.2(4) . . . . ?
C4 C3 C8 F3 -177.9(3) . . . . ?
C2 C3 C8 F3 -2.3(5) . . . . ?
C4 C3 C8 C7 0.3(5) . . . . ?
C2 C3 C8 C7 175.9(4) . . . . ?
I2 C9 C10 C5 -142(19) . . . . ?
C6 C5 C10 C9 -157(21) . . . . ?
C4 C5 C10 C9 26(22) . . . . ?
I3 C11 C12 C7 -26(21) . . . . ?
C8 C7 C12 C11 96(9) . . . . ?
C6 C7 C12 C11 -81(9) . . . . ?
C17 S1 C13 C14 -177.6(3) . . . . ?
C21 S1 C13 C14 -69.8(3) . . . . ?
S1 C13 C14 C15 -175.6(3) . . . . ?
C13 C14 C15 C16 -179.5(4) . . . . ?
C13 S1 C17 C18 -168.7(3) . . . . ?
C21 S1 C17 C18 82.9(3) . . . . ?
S1 C17 C18 C19 179.9(3) . . . . ?
C17 C18 C19 C20 -179.0(4) . . . . ?
C17 S1 C21 C22 70.4(4) . . . . ?
C13 S1 C21 C22 -35.8(4) . . . . ?
S1 C21 C22 C23 -178.7(3) . . . . ?
C21 C22 C23 C24 177.5(4) . . . . ?
 
_diffrn_measured_fraction_theta_max    0.995
_diffrn_reflns_theta_full              27.54
_diffrn_measured_fraction_theta_full   0.995
_refine_diff_density_max    1.430
_refine_diff_density_min   -0.558
_refine_diff_density_rms    0.116

#===END


data_1-Bu4NBr 
 
_audit_creation_method            SHELXL-97 
_chemical_name_systematic 
; 
 ? 
; 
_chemical_name_common             ? 
_chemical_melting_point           ? 
_chemical_formula_moiety          
'C12 F3 I3, C16 H36 N, Br'
_chemical_formula_sum 
 'C28 H36 Br F3 I3 N' 
_chemical_formula_weight          904.19 
 
loop_ 
 _atom_type_symbol 
 _atom_type_description 
 _atom_type_scat_dispersion_real 
 _atom_type_scat_dispersion_imag 
 _atom_type_scat_source 
 'C'  'C'   0.0033   0.0016 
 'International Tables Vol C Tables 4.2.6.8 and 6.1.1.4' 
 'H'  'H'   0.0000   0.0000 
 'International Tables Vol C Tables 4.2.6.8 and 6.1.1.4' 
 'N'  'N'   0.0061   0.0033 
 'International Tables Vol C Tables 4.2.6.8 and 6.1.1.4' 
 'F'  'F'   0.0171   0.0103 
 'International Tables Vol C Tables 4.2.6.8 and 6.1.1.4' 
 'Br'  'Br'  -0.2901   2.4595 
 'International Tables Vol C Tables 4.2.6.8 and 6.1.1.4' 
 'I'  'I'  -0.4742   1.8119 
 'International Tables Vol C Tables 4.2.6.8 and 6.1.1.4' 
 
_symmetry_cell_setting            monoclinic 
_symmetry_space_group_name_H-M    'C c' 
_symmetry_space_group_name_Hall   'C -2yc'

 
loop_ 
 _symmetry_equiv_pos_as_xyz 
 'x, y, z' 
 'x, -y, z+1/2' 
 'x+1/2, y+1/2, z' 
 'x+1/2, -y+1/2, z+1/2' 
 
_cell_length_a                    14.2433(4) 
_cell_length_b                    13.5460(4) 
_cell_length_c                    17.5077(4) 
_cell_angle_alpha                 90.00 
_cell_angle_beta                  91.861(2) 
_cell_angle_gamma                 90.00 
_cell_volume                      3376.15(16) 
_cell_formula_units_Z             4 
_cell_measurement_temperature     150(2) 
_cell_measurement_reflns_used     6479 
_cell_measurement_theta_min       3.6309  
_cell_measurement_theta_max       27.4994  
 
_exptl_crystal_description        prism 
_exptl_crystal_colour             white 
_exptl_crystal_size_max           0.13 
_exptl_crystal_size_mid           0.12 
_exptl_crystal_size_min           0.06 
_exptl_crystal_density_meas       ? 
_exptl_crystal_density_diffrn     1.779 
_exptl_crystal_density_method     'not measured' 
_exptl_crystal_F_000              1728 
_exptl_absorpt_coefficient_mu     3.994 
_exptl_absorpt_correction_type                              multi-scan
_exptl_absorpt_process_details
;
  [Sheldrick, G.M. (2002). SADABS Bruker AXS Inc., Madison, Wisconsin, USA]
;
_exptl_absorpt_correction_T_min                      0.601

_exptl_absorpt_correction_T_max                      0.787


#----------------------------- Remark --------------------------------#
# SADABS output:                                                      #
# Estimated minimum and maximum transmission:  0.5830  0.7456
#
# The ratio of these values is more reliable than their absolute values!  #
#---------------------------------------------------------------------# 
_exptl_special_details 
; 
 ? 
; 
 
_diffrn_ambient_temperature       150(2) 
_diffrn_radiation_wavelength      0.71073
_diffrn_radiation_type            MoK\a
_diffrn_radiation_source          'fine-focus sealed tube'
_diffrn_radiation_monochromator   graphite
_diffrn_measurement_device_type   'APEXII, Bruker-AXS'
_diffrn_measurement_method        'CCD rotation images, thin slices'
_diffrn_detector                  'CCD plate'
_diffrn_standards_number          ? 
_diffrn_standards_interval_count  ? 
_diffrn_standards_interval_time   ? 
_diffrn_standards_decay_%         ? 
_diffrn_reflns_number             28459 
_diffrn_reflns_av_R_equivalents   0.0600 
_diffrn_reflns_av_sigmaI/netI     0.0542 
_diffrn_reflns_limit_h_min        -18 
_diffrn_reflns_limit_h_max        18 
_diffrn_reflns_limit_k_min        -17 
_diffrn_reflns_limit_k_max        17 
_diffrn_reflns_limit_l_min        -22 
_diffrn_reflns_limit_l_max        22 
_diffrn_reflns_theta_min          3.63 
_diffrn_reflns_theta_max          27.50 
_reflns_number_total              7279 
_reflns_number_gt                 5997 
_reflns_threshold_expression      >2sigma(I) 
 
_computing_data_collection        'Bruker SMART, 2006'
_computing_cell_refinement        'Bruker SMART, 2006'
_computing_data_reduction         'Bruker SAINT, 2006'
_computing_structure_solution     'SIR97 (Altomare et al., 1999)'
_computing_structure_refinement   'SHELXL-97 (Sheldrick, 1997)'
_computing_molecular_graphics     'Ortep-3 for Windows (Farrugia, 1997)'
_computing_publication_material   'WinGX publication routines (Farrugia, 1999)'

 
_refine_special_details 
; 
 Refinement of F^2^ against ALL reflections.  The weighted R-factor wR and 
 goodness of fit S are based on F^2^, conventional R-factors R are based 
 on F, with F set to zero for negative F^2^. The threshold expression of 
 F^2^ > 2sigma(F^2^) is used only for calculating R-factors(gt) etc. and is 
 not relevant to the choice of reflections for refinement.  R-factors based 
 on F^2^ are statistically about twice as large as those based on F, and R- 
 factors based on ALL data will be even larger. 
; 
 
_refine_ls_structure_factor_coef  Fsqd  
_refine_ls_matrix_type            full 
_refine_ls_weighting_scheme       calc  
_refine_ls_weighting_details 
 'calc w=1/[\s^2^(Fo^2^)+(0.0292P)^2^+13.4767P] where P=(Fo^2^+2Fc^2^)/3' 
_atom_sites_solution_primary      direct 
_atom_sites_solution_secondary    difmap 
_atom_sites_solution_hydrogens    geom 
_refine_ls_hydrogen_treatment    constr
_refine_ls_extinction_method      none 
_refine_ls_extinction_coef        ? 
_refine_ls_abs_structure_details 
 'Flack H D (1983), Acta Cryst. A39, 876-881' 
_refine_ls_abs_structure_Flack    0.028(14) 
_refine_ls_number_reflns          7279 
_refine_ls_number_parameters      325 
_refine_ls_number_restraints      2 
_refine_ls_R_factor_all           0.0586 
_refine_ls_R_factor_gt            0.0402 
_refine_ls_wR_factor_ref          0.0899 
_refine_ls_wR_factor_gt           0.0819 
_refine_ls_goodness_of_fit_ref    1.058 
_refine_ls_restrained_S_all       1.057 
_refine_ls_shift/su_max           0.000 
_refine_ls_shift/su_mean          0.000 
 
loop_ 
 _atom_site_label 
 _atom_site_type_symbol 
 _atom_site_fract_x 
 _atom_site_fract_y 
 _atom_site_fract_z 
 _atom_site_U_iso_or_equiv 
 _atom_site_adp_type 
 _atom_site_occupancy 
 _atom_site_symmetry_multiplicity 
 _atom_site_calc_flag 
 _atom_site_refinement_flags 
 _atom_site_disorder_assembly 
 _atom_site_disorder_group 
I001 I -0.25029(3) 0.54547(4) 0.39105(3) 0.04068(13) Uani 1 1 d . . . 
I002 I 0.44685(4) 0.56135(4) 0.40729(3) 0.04377(14) Uani 1 1 d . . . 
I003 I 0.11710(3) -0.03345(4) 0.10194(3) 0.03984(13) Uani 1 1 d . . . 
F3 F -0.0595(3) 0.2426(4) 0.2531(3) 0.0429(10) Uani 1 1 d . . . 
F2 F 0.2696(3) 0.2562(3) 0.2632(3) 0.0443(11) Uani 1 1 d . . . 
F1 F 0.0948(4) 0.4988(3) 0.3853(3) 0.0458(12) Uani 1 1 d . . . 
C1 C -0.1438(6) 0.4607(6) 0.3529(4) 0.0435(19) Uani 1 1 d . . . 
C2 C -0.0748(6) 0.4177(5) 0.3363(4) 0.0362(17) Uani 1 1 d . . . 
C3 C 0.0135(5) 0.3737(5) 0.3191(4) 0.0361(16) Uani 1 1 d . . . 
C4 C 0.0984(6) 0.4157(5) 0.3435(4) 0.0340(16) Uani 1 1 d . . . 
C5 C 0.1881(5) 0.3805(5) 0.3260(4) 0.0350(16) Uani 1 1 d . . . 
C6 C 0.1864(6) 0.2927(5) 0.2823(4) 0.0365(17) Uani 1 1 d . . . 
C7 C 0.1038(5) 0.2448(5) 0.2567(4) 0.0331(15) Uani 1 1 d . . . 
C8 C 0.0199(5) 0.2860(5) 0.2762(4) 0.0355(17) Uani 1 1 d . . . 
C9 C 0.3370(7) 0.4785(6) 0.3702(5) 0.046(2) Uani 1 1 d . . . 
C10 C 0.2697(6) 0.4314(6) 0.3494(5) 0.0412(18) Uani 1 1 d . . . 
C11 C 0.1129(6) 0.0846(6) 0.1738(4) 0.0430(19) Uani 1 1 d . . . 
C12 C 0.1098(6) 0.1553(6) 0.2110(4) 0.0399(18) Uani 1 1 d . . . 
Br1 Br -0.38397(6) 0.70069(5) 0.47395(5) 0.03886(17) Uani 1 1 d . . . 
N1 N 0.4877(4) 0.0688(4) 0.1125(3) 0.0316(13) Uani 1 1 d . . . 
C13 C 0.4438(6) -0.0343(6) 0.1180(5) 0.0387(18) Uani 1 1 d . . . 
H13A H 0.3774 -0.0268 0.1274 0.046 Uiso 1 1 calc R . . 
H13B H 0.4723 -0.0680 0.1618 0.046 Uiso 1 1 calc R . . 
C14 C 0.4543(6) -0.1007(6) 0.0463(4) 0.0395(17) Uani 1 1 d . . . 
H14A H 0.4318 -0.0657 0.0010 0.047 Uiso 1 1 calc R . . 
H14B H 0.5200 -0.1170 0.0401 0.047 Uiso 1 1 calc R . . 
C15 C 0.3983(7) -0.1936(6) 0.0560(5) 0.051(2) Uani 1 1 d . . . 
H15A H 0.3324 -0.1766 0.0592 0.061 Uiso 1 1 calc R . . 
H15B H 0.4179 -0.2250 0.1038 0.061 Uiso 1 1 calc R . . 
C16 C 0.4100(7) -0.2664(7) -0.0090(6) 0.054(2) Uani 1 1 d . . . 
H16A H 0.3729 -0.3242 -0.0002 0.081 Uiso 1 1 calc R . . 
H16B H 0.4750 -0.2847 -0.0117 0.081 Uiso 1 1 calc R . . 
H16C H 0.3896 -0.2362 -0.0563 0.081 Uiso 1 1 calc R . . 
C17 C 0.5885(5) 0.0647(5) 0.0868(4) 0.0365(17) Uani 1 1 d . . . 
H17A H 0.5883 0.0346 0.0365 0.044 Uiso 1 1 calc R . . 
H17B H 0.6107 0.1319 0.0813 0.044 Uiso 1 1 calc R . . 
C18 C 0.6586(6) 0.0098(7) 0.1375(5) 0.0437(19) Uani 1 1 d . . . 
H18A H 0.6374 -0.0575 0.1448 0.052 Uiso 1 1 calc R . . 
H18B H 0.6638 0.0415 0.1871 0.052 Uiso 1 1 calc R . . 
C19 C 0.7553(7) 0.0093(10) 0.1000(6) 0.067(3) Uani 1 1 d . . . 
H19A H 0.7483 -0.0217 0.0502 0.080 Uiso 1 1 calc R . . 
H19B H 0.7745 0.0771 0.0920 0.080 Uiso 1 1 calc R . . 
C20 C 0.8293(7) -0.0409(11) 0.1431(8) 0.093(5) Uani 1 1 d . . . 
H20A H 0.8865 -0.0374 0.1157 0.140 Uiso 1 1 calc R . . 
H20B H 0.8122 -0.1088 0.1500 0.140 Uiso 1 1 calc R . . 
H20C H 0.8382 -0.0098 0.1920 0.140 Uiso 1 1 calc R . . 
C21 C 0.4832(6) 0.1123(6) 0.1923(4) 0.0420(18) Uani 1 1 d . . . 
H21A H 0.4181 0.1126 0.2069 0.050 Uiso 1 1 calc R . . 
H21B H 0.5172 0.0687 0.2275 0.050 Uiso 1 1 calc R . . 
C22 C 0.5216(7) 0.2144(6) 0.2028(5) 0.052(2) Uani 1 1 d . . . 
H22A H 0.4830 0.2608 0.1735 0.062 Uiso 1 1 calc R . . 
H22B H 0.5849 0.2173 0.1841 0.062 Uiso 1 1 calc R . . 
C23 C 0.5226(8) 0.2427(8) 0.2879(6) 0.070(3) Uani 1 1 d . . . 
H23A H 0.4583 0.2457 0.3043 0.084 Uiso 1 1 calc R . . 
H23B H 0.5541 0.1908 0.3170 0.084 Uiso 1 1 calc R . . 
C24 C 0.5690(11) 0.3375(8) 0.3067(7) 0.097(5) Uani 1 1 d . . . 
H24A H 0.5658 0.3496 0.3606 0.145 Uiso 1 1 calc R . . 
H24B H 0.5377 0.3899 0.2791 0.145 Uiso 1 1 calc R . . 
H24C H 0.6335 0.3347 0.2928 0.145 Uiso 1 1 calc R . . 
C25 C 0.4348(5) 0.1330(5) 0.0529(4) 0.0368(17) Uani 1 1 d . . . 
H25A H 0.4668 0.1961 0.0501 0.044 Uiso 1 1 calc R . . 
H25B H 0.4392 0.1015 0.0034 0.044 Uiso 1 1 calc R . . 
C26 C 0.3326(5) 0.1522(6) 0.0670(5) 0.0413(18) Uani 1 1 d . . . 
H26A H 0.2972 0.0913 0.0619 0.050 Uiso 1 1 calc R . . 
H26B H 0.3257 0.1771 0.1185 0.050 Uiso 1 1 calc R . . 
C27 C 0.2956(6) 0.2268(6) 0.0099(5) 0.046(2) Uani 1 1 d . . . 
H27A H 0.3073 0.2030 -0.0412 0.055 Uiso 1 1 calc R . . 
H27B H 0.3301 0.2880 0.0171 0.055 Uiso 1 1 calc R . . 
C28 C 0.1912(7) 0.2481(8) 0.0157(6) 0.061(3) Uani 1 1 d . . . 
H28A H 0.1724 0.2958 -0.0224 0.091 Uiso 1 1 calc R . . 
H28B H 0.1791 0.2736 0.0655 0.091 Uiso 1 1 calc R . . 
H28C H 0.1563 0.1882 0.0074 0.091 Uiso 1 1 calc R . . 
 
loop_ 
 _atom_site_aniso_label 
 _atom_site_aniso_U_11 
 _atom_site_aniso_U_22 
 _atom_site_aniso_U_33 
 _atom_site_aniso_U_23 
 _atom_site_aniso_U_13 
 _atom_site_aniso_U_12 
I001 0.0385(3) 0.0433(3) 0.0404(3) 0.0020(2) 0.0023(2) 0.0067(2) 
I002 0.0465(3) 0.0387(3) 0.0461(3) 0.0006(2) 0.0009(2) -0.0006(2) 
I003 0.0432(3) 0.0349(3) 0.0418(3) -0.0056(2) 0.0070(2) -0.0054(2) 
F3 0.036(2) 0.053(3) 0.039(2) 0.000(2) -0.0017(18) -0.002(2) 
F2 0.042(3) 0.043(3) 0.048(3) -0.003(2) 0.008(2) 0.008(2) 
F1 0.060(3) 0.034(2) 0.044(3) -0.008(2) 0.007(2) 0.004(2) 
C1 0.055(5) 0.039(4) 0.037(4) 0.006(3) 0.004(4) 0.000(4) 
C2 0.040(4) 0.035(4) 0.033(4) 0.006(3) 0.002(3) 0.008(3) 
C3 0.040(4) 0.038(4) 0.030(4) 0.007(3) 0.004(3) 0.003(3) 
C4 0.045(4) 0.034(4) 0.023(3) 0.001(3) 0.000(3) 0.004(3) 
C5 0.042(4) 0.033(4) 0.029(4) 0.003(3) 0.001(3) -0.002(3) 
C6 0.042(4) 0.033(4) 0.035(4) 0.006(3) 0.008(3) 0.007(3) 
C7 0.038(4) 0.034(4) 0.028(4) 0.001(3) 0.002(3) 0.003(3) 
C8 0.040(5) 0.037(4) 0.029(4) 0.011(3) 0.004(3) 0.004(3) 
C9 0.050(5) 0.047(5) 0.042(4) -0.001(4) 0.000(4) 0.007(4) 
C10 0.041(5) 0.039(4) 0.044(4) -0.006(3) 0.004(4) 0.005(4) 
C11 0.050(5) 0.047(5) 0.032(4) 0.013(4) -0.003(3) -0.010(4) 
C12 0.054(5) 0.035(4) 0.031(4) -0.002(3) 0.001(3) -0.002(4) 
Br1 0.0460(4) 0.0281(3) 0.0428(4) 0.0024(3) 0.0063(3) 0.0049(3) 
N1 0.032(3) 0.032(3) 0.031(3) 0.003(2) 0.003(2) -0.003(3) 
C13 0.040(5) 0.037(4) 0.039(4) 0.003(3) 0.007(3) -0.005(3) 
C14 0.039(4) 0.043(4) 0.037(4) -0.007(3) -0.002(3) 0.002(3) 
C15 0.066(6) 0.038(4) 0.050(5) 0.004(4) 0.001(4) -0.005(4) 
C16 0.050(6) 0.045(5) 0.066(6) -0.019(4) -0.002(4) -0.005(4) 
C17 0.043(5) 0.033(4) 0.034(4) -0.001(3) 0.009(3) -0.005(3) 
C18 0.037(5) 0.056(5) 0.038(4) -0.007(4) -0.005(3) 0.002(4) 
C19 0.042(6) 0.095(8) 0.064(7) 0.013(6) 0.008(5) -0.003(6) 
C20 0.036(6) 0.140(13) 0.106(10) 0.048(9) 0.028(6) 0.029(7) 
C21 0.044(5) 0.045(4) 0.037(4) -0.008(3) 0.005(3) -0.005(4) 
C22 0.060(6) 0.044(5) 0.052(5) -0.017(4) 0.008(4) -0.011(4) 
C23 0.085(8) 0.063(6) 0.061(6) -0.025(5) 0.009(5) -0.001(6) 
C24 0.159(14) 0.049(6) 0.084(8) -0.016(6) 0.014(8) -0.017(7) 
C25 0.038(4) 0.035(4) 0.037(4) 0.010(3) -0.003(3) -0.003(3) 
C26 0.036(4) 0.040(4) 0.048(4) 0.004(3) -0.002(3) -0.005(3) 
C27 0.050(5) 0.047(5) 0.040(4) 0.003(4) 0.005(4) 0.007(4) 
C28 0.048(6) 0.058(6) 0.077(8) 0.008(5) 0.008(5) 0.007(5) 
 
_geom_special_details 
; 
 All esds (except the esd in the dihedral angle between two l.s. planes) 
 are estimated using the full covariance matrix.  The cell esds are taken 
 into account individually in the estimation of esds in distances, angles 
 and torsion angles; correlations between esds in cell parameters are only 
 used when they are defined by crystal symmetry.  An approximate (isotropic) 
 treatment of cell esds is used for estimating esds involving l.s. planes. 
; 
 
loop_ 
 _geom_bond_atom_site_label_1 
 _geom_bond_atom_site_label_2 
 _geom_bond_distance 
 _geom_bond_site_symmetry_2 
 _geom_bond_publ_flag 
I001 C1 2.032(9) . ? 
I002 C9 2.016(9) . ? 
I003 C11 2.036(9) . ? 
F3 C8 1.325(9) . ? 
F2 C6 1.338(9) . ? 
F1 C4 1.345(8) . ? 
C1 C2 1.187(11) . ? 
C2 C3 1.433(11) . ? 
C3 C4 1.390(11) . ? 
C3 C8 1.411(10) . ? 
C4 C5 1.406(11) . ? 
C5 C10 1.401(11) . ? 
C5 C6 1.414(10) . ? 
C6 C7 1.404(11) . ? 
C7 C8 1.372(10) . ? 
C7 C12 1.456(10) . ? 
C9 C10 1.198(12) . ? 
C11 C12 1.160(11) . ? 
N1 C21 1.520(9) . ? 
N1 C17 1.520(10) . ? 
N1 C13 1.534(9) . ? 
N1 C25 1.537(9) . ? 
C13 C14 1.556(10) . ? 
C13 H13A 0.9700 . ? 
C13 H13B 0.9700 . ? 
C14 C15 1.502(11) . ? 
C14 H14A 0.9700 . ? 
C14 H14B 0.9700 . ? 
C15 C16 1.520(12) . ? 
C15 H15A 0.9700 . ? 
C15 H15B 0.9700 . ? 
C16 H16A 0.9600 . ? 
C16 H16B 0.9600 . ? 
C16 H16C 0.9600 . ? 
C17 C18 1.509(11) . ? 
C17 H17A 0.9700 . ? 
C17 H17B 0.9700 . ? 
C18 C19 1.544(13) . ? 
C18 H18A 0.9700 . ? 
C18 H18B 0.9700 . ? 
C19 C20 1.445(15) . ? 
C19 H19A 0.9700 . ? 
C19 H19B 0.9700 . ? 
C20 H20A 0.9600 . ? 
C20 H20B 0.9600 . ? 
C20 H20C 0.9600 . ? 
C21 C22 1.495(11) . ? 
C21 H21A 0.9700 . ? 
C21 H21B 0.9700 . ? 
C22 C23 1.540(12) . ? 
C22 H22A 0.9700 . ? 
C22 H22B 0.9700 . ? 
C23 C24 1.476(14) . ? 
C23 H23A 0.9700 . ? 
C23 H23B 0.9700 . ? 
C24 H24A 0.9600 . ? 
C24 H24B 0.9600 . ? 
C24 H24C 0.9600 . ? 
C25 C26 1.507(10) . ? 
C25 H25A 0.9700 . ? 
C25 H25B 0.9700 . ? 
C26 C27 1.505(11) . ? 
C26 H26A 0.9700 . ? 
C26 H26B 0.9700 . ? 
C27 C28 1.521(12) . ? 
C27 H27A 0.9700 . ? 
C27 H27B 0.9700 . ? 
C28 H28A 0.9600 . ? 
C28 H28B 0.9600 . ? 
C28 H28C 0.9600 . ? 
 
loop_ 
 _geom_angle_atom_site_label_1 
 _geom_angle_atom_site_label_2 
 _geom_angle_atom_site_label_3 
 _geom_angle 
 _geom_angle_site_symmetry_1 
 _geom_angle_site_symmetry_3 
 _geom_angle_publ_flag 
C2 C1 I001 172.2(8) . . ? 
C1 C2 C3 174.5(9) . . ? 
C4 C3 C8 116.0(7) . . ? 
C4 C3 C2 121.7(7) . . ? 
C8 C3 C2 122.3(7) . . ? 
F1 C4 C3 117.5(7) . . ? 
F1 C4 C5 116.9(7) . . ? 
C3 C4 C5 125.6(7) . . ? 
C10 C5 C4 121.4(7) . . ? 
C10 C5 C6 124.9(7) . . ? 
C4 C5 C6 113.8(7) . . ? 
F2 C6 C7 119.3(7) . . ? 
F2 C6 C5 116.6(7) . . ? 
C7 C6 C5 124.2(7) . . ? 
C8 C7 C6 117.4(7) . . ? 
C8 C7 C12 122.8(7) . . ? 
C6 C7 C12 119.8(7) . . ? 
F3 C8 C7 119.0(7) . . ? 
F3 C8 C3 117.8(7) . . ? 
C7 C8 C3 123.1(7) . . ? 
C10 C9 I002 177.8(8) . . ? 
C9 C10 C5 177.1(9) . . ? 
C12 C11 I003 176.1(7) . . ? 
C11 C12 C7 178.6(9) . . ? 
C21 N1 C17 110.8(6) . . ? 
C21 N1 C13 105.4(6) . . ? 
C17 N1 C13 112.1(6) . . ? 
C21 N1 C25 111.7(6) . . ? 
C17 N1 C25 105.4(5) . . ? 
C13 N1 C25 111.5(6) . . ? 
N1 C13 C14 115.2(6) . . ? 
N1 C13 H13A 108.5 . . ? 
C14 C13 H13A 108.5 . . ? 
N1 C13 H13B 108.5 . . ? 
C14 C13 H13B 108.5 . . ? 
H13A C13 H13B 107.5 . . ? 
C15 C14 C13 109.1(7) . . ? 
C15 C14 H14A 109.9 . . ? 
C13 C14 H14A 109.9 . . ? 
C15 C14 H14B 109.9 . . ? 
C13 C14 H14B 109.9 . . ? 
H14A C14 H14B 108.3 . . ? 
C14 C15 C16 112.7(8) . . ? 
C14 C15 H15A 109.0 . . ? 
C16 C15 H15A 109.0 . . ? 
C14 C15 H15B 109.0 . . ? 
C16 C15 H15B 109.0 . . ? 
H15A C15 H15B 107.8 . . ? 
C15 C16 H16A 109.5 . . ? 
C15 C16 H16B 109.5 . . ? 
H16A C16 H16B 109.5 . . ? 
C15 C16 H16C 109.5 . . ? 
H16A C16 H16C 109.5 . . ? 
H16B C16 H16C 109.5 . . ? 
C18 C17 N1 117.2(6) . . ? 
C18 C17 H17A 108.0 . . ? 
N1 C17 H17A 108.0 . . ? 
C18 C17 H17B 108.0 . . ? 
N1 C17 H17B 108.0 . . ? 
H17A C17 H17B 107.2 . . ? 
C17 C18 C19 109.5(7) . . ? 
C17 C18 H18A 109.8 . . ? 
C19 C18 H18A 109.8 . . ? 
C17 C18 H18B 109.8 . . ? 
C19 C18 H18B 109.8 . . ? 
H18A C18 H18B 108.2 . . ? 
C20 C19 C18 115.2(9) . . ? 
C20 C19 H19A 108.5 . . ? 
C18 C19 H19A 108.5 . . ? 
C20 C19 H19B 108.5 . . ? 
C18 C19 H19B 108.5 . . ? 
H19A C19 H19B 107.5 . . ? 
C19 C20 H20A 109.5 . . ? 
C19 C20 H20B 109.5 . . ? 
H20A C20 H20B 109.5 . . ? 
C19 C20 H20C 109.5 . . ? 
H20A C20 H20C 109.5 . . ? 
H20B C20 H20C 109.5 . . ? 
C22 C21 N1 116.4(7) . . ? 
C22 C21 H21A 108.2 . . ? 
N1 C21 H21A 108.2 . . ? 
C22 C21 H21B 108.2 . . ? 
N1 C21 H21B 108.2 . . ? 
H21A C21 H21B 107.3 . . ? 
C21 C22 C23 109.9(8) . . ? 
C21 C22 H22A 109.7 . . ? 
C23 C22 H22A 109.7 . . ? 
C21 C22 H22B 109.7 . . ? 
C23 C22 H22B 109.7 . . ? 
H22A C22 H22B 108.2 . . ? 
C24 C23 C22 115.1(10) . . ? 
C24 C23 H23A 108.5 . . ? 
C22 C23 H23A 108.5 . . ? 
C24 C23 H23B 108.5 . . ? 
C22 C23 H23B 108.5 . . ? 
H23A C23 H23B 107.5 . . ? 
C23 C24 H24A 109.5 . . ? 
C23 C24 H24B 109.5 . . ? 
H24A C24 H24B 109.5 . . ? 
C23 C24 H24C 109.5 . . ? 
H24A C24 H24C 109.5 . . ? 
H24B C24 H24C 109.5 . . ? 
C26 C25 N1 116.2(6) . . ? 
C26 C25 H25A 108.2 . . ? 
N1 C25 H25A 108.2 . . ? 
C26 C25 H25B 108.2 . . ? 
N1 C25 H25B 108.2 . . ? 
H25A C25 H25B 107.4 . . ? 
C27 C26 C25 109.1(6) . . ? 
C27 C26 H26A 109.9 . . ? 
C25 C26 H26A 109.9 . . ? 
C27 C26 H26B 109.9 . . ? 
C25 C26 H26B 109.9 . . ? 
H26A C26 H26B 108.3 . . ? 
C26 C27 C28 113.9(7) . . ? 
C26 C27 H27A 108.8 . . ? 
C28 C27 H27A 108.8 . . ? 
C26 C27 H27B 108.8 . . ? 
C28 C27 H27B 108.8 . . ? 
H27A C27 H27B 107.7 . . ? 
C27 C28 H28A 109.5 . . ? 
C27 C28 H28B 109.5 . . ? 
H28A C28 H28B 109.5 . . ? 
C27 C28 H28C 109.5 . . ? 
H28A C28 H28C 109.5 . . ? 
H28B C28 H28C 109.5 . . ? 
 
loop_ 
 _geom_torsion_atom_site_label_1 
 _geom_torsion_atom_site_label_2 
 _geom_torsion_atom_site_label_3 
 _geom_torsion_atom_site_label_4 
 _geom_torsion 
 _geom_torsion_site_symmetry_1 
 _geom_torsion_site_symmetry_2 
 _geom_torsion_site_symmetry_3 
 _geom_torsion_site_symmetry_4 
 _geom_torsion_publ_flag 
I001 C1 C2 C3 -19(12) . . . . ? 
C1 C2 C3 C4 7(9) . . . . ? 
C1 C2 C3 C8 -172(8) . . . . ? 
C8 C3 C4 F1 -179.3(6) . . . . ? 
C2 C3 C4 F1 1.2(10) . . . . ? 
C8 C3 C4 C5 3.0(10) . . . . ? 
C2 C3 C4 C5 -176.6(7) . . . . ? 
F1 C4 C5 C10 -1.7(10) . . . . ? 
C3 C4 C5 C10 176.0(7) . . . . ? 
F1 C4 C5 C6 179.7(6) . . . . ? 
C3 C4 C5 C6 -2.5(10) . . . . ? 
C10 C5 C6 F2 0.8(11) . . . . ? 
C4 C5 C6 F2 179.3(6) . . . . ? 
C10 C5 C6 C7 -177.3(7) . . . . ? 
C4 C5 C6 C7 1.3(10) . . . . ? 
F2 C6 C7 C8 -178.6(6) . . . . ? 
C5 C6 C7 C8 -0.6(11) . . . . ? 
F2 C6 C7 C12 1.1(10) . . . . ? 
C5 C6 C7 C12 179.2(7) . . . . ? 
C6 C7 C8 F3 -179.8(6) . . . . ? 
C12 C7 C8 F3 0.4(10) . . . . ? 
C6 C7 C8 C3 1.0(10) . . . . ? 
C12 C7 C8 C3 -178.8(7) . . . . ? 
C4 C3 C8 F3 178.7(6) . . . . ? 
C2 C3 C8 F3 -1.8(10) . . . . ? 
C4 C3 C8 C7 -2.1(10) . . . . ? 
C2 C3 C8 C7 177.5(7) . . . . ? 
I002 C9 C10 C5 17(35) . . . . ? 
C4 C5 C10 C9 -13(18) . . . . ? 
C6 C5 C10 C9 166(17) . . . . ? 
I003 C11 C12 C7 47(47) . . . . ? 
C8 C7 C12 C11 37(39) . . . . ? 
C6 C7 C12 C11 -143(39) . . . . ? 
C21 N1 C13 C14 -170.8(7) . . . . ? 
C17 N1 C13 C14 -50.2(9) . . . . ? 
C25 N1 C13 C14 67.8(8) . . . . ? 
N1 C13 C14 C15 -173.2(7) . . . . ? 
C13 C14 C15 C16 -176.0(7) . . . . ? 
C21 N1 C17 C18 56.0(8) . . . . ? 
C13 N1 C17 C18 -61.4(8) . . . . ? 
C25 N1 C17 C18 177.1(6) . . . . ? 
N1 C17 C18 C19 177.2(8) . . . . ? 
C17 C18 C19 C20 179.8(10) . . . . ? 
C17 N1 C21 C22 58.9(9) . . . . ? 
C13 N1 C21 C22 -179.6(7) . . . . ? 
C25 N1 C21 C22 -58.3(9) . . . . ? 
N1 C21 C22 C23 -173.4(8) . . . . ? 
C21 C22 C23 C24 173.3(10) . . . . ? 
C21 N1 C25 C26 -57.3(8) . . . . ? 
C17 N1 C25 C26 -177.7(6) . . . . ? 
C13 N1 C25 C26 60.4(8) . . . . ? 
N1 C25 C26 C27 172.3(6) . . . . ? 
C25 C26 C27 C28 176.8(7) . . . . ? 
 
_diffrn_measured_fraction_theta_max    0.997 
_diffrn_reflns_theta_full              27.50 
_diffrn_measured_fraction_theta_full   0.997 
_refine_diff_density_max    0.962 
_refine_diff_density_min   -0.850 
_refine_diff_density_rms    0.125 

#===END


data_1-PPNCl 
 
_audit_creation_method            SHELXL-97 
_chemical_name_systematic 
; 
 ? 
; 
_chemical_name_common             ? 
_chemical_melting_point           ? 
_chemical_formula_moiety          
'C36 H30 N P2, C12 F3 I3, Cl'
_chemical_formula_sum 
 'C48 H30 Cl F3 I3 N P2' 
_chemical_formula_weight          1155.82 
 
loop_ 
 _atom_type_symbol 
 _atom_type_description 
 _atom_type_scat_dispersion_real 
 _atom_type_scat_dispersion_imag 
 _atom_type_scat_source 
 'C'  'C'   0.0033   0.0016 
 'International Tables Vol C Tables 4.2.6.8 and 6.1.1.4' 
 'H'  'H'   0.0000   0.0000 
 'International Tables Vol C Tables 4.2.6.8 and 6.1.1.4' 
 'N'  'N'   0.0061   0.0033 
 'International Tables Vol C Tables 4.2.6.8 and 6.1.1.4' 
 'F'  'F'   0.0171   0.0103 
 'International Tables Vol C Tables 4.2.6.8 and 6.1.1.4' 
 'P'  'P'   0.1023   0.0942 
 'International Tables Vol C Tables 4.2.6.8 and 6.1.1.4' 
 'Cl'  'Cl'   0.1484   0.1585 
 'International Tables Vol C Tables 4.2.6.8 and 6.1.1.4' 
 'I'  'I'  -0.4742   1.8119 
 'International Tables Vol C Tables 4.2.6.8 and 6.1.1.4' 
 
_symmetry_cell_setting                  'triclinic'
_symmetry_space_group_name_H-M          'P -1'
_symmetry_space_group_name_Hall   '-P 1'


loop_ 
 _symmetry_equiv_pos_as_xyz 
 'x, y, z' 
 '-x, -y, -z' 
 
_cell_length_a                    15.3532(6) 
_cell_length_b                    15.7529(6) 
_cell_length_c                    16.7017(6) 
_cell_angle_alpha                 62.9040(10) 
_cell_angle_beta                  62.941(2) 
_cell_angle_gamma                 61.7050(10) 
_cell_volume                      3015.6(2) 
_cell_formula_units_Z             2 
_cell_measurement_temperature     150(2) 
_cell_measurement_reflns_used            9969
_cell_measurement_theta_min              2.44
_cell_measurement_theta_max             27.44 

_exptl_crystal_description        stick 
_exptl_crystal_colour             white 
_exptl_crystal_size_max           0.26 
_exptl_crystal_size_mid           0.11 
_exptl_crystal_size_min           0.05 
_exptl_crystal_density_meas       ? 
_exptl_crystal_density_diffrn     1.273 
_exptl_crystal_density_method     'not measured' 
_exptl_crystal_F_000              1116 
_exptl_absorpt_coefficient_mu     1.687 
_exptl_absorpt_correction_type                              multi-scan
_exptl_absorpt_process_details
;
  [Sheldrick, G.M. (2002). SADABS Bruker AXS Inc., Madison, Wisconsin, USA]
;
_exptl_absorpt_correction_T_min              0.800
_exptl_absorpt_correction_T_max              0.919

#----------------------------- Remark --------------------------------#
# SADABS output:                                                          #
# Estimated minimum and maximum transmission: 0.5768  0.7456          #
# The ratio of these values is more reliable than their absolute values!  #
#--------------------------------------------------------------------#

 
_exptl_special_details 
; 
 ? 
; 
 
_diffrn_ambient_temperature       150(2)
_diffrn_radiation_wavelength      0.71073
_diffrn_radiation_type            MoK\a
_diffrn_radiation_source          'fine-focus sealed tube'
_diffrn_radiation_monochromator   graphite
_diffrn_measurement_device_type   'APEXII, Bruker-AXS'
_diffrn_measurement_method        'CCD rotation images, thin slices'
_diffrn_detector                  'CCD plate'
_diffrn_standards_number          ? 
_diffrn_standards_interval_count  ? 
_diffrn_standards_interval_time   ? 
_diffrn_standards_decay_%         ? 
_diffrn_reflns_number             45379 
_diffrn_reflns_av_R_equivalents   0.0383 
_diffrn_reflns_av_sigmaI/netI     0.0385 
_diffrn_reflns_limit_h_min        -19 
_diffrn_reflns_limit_h_max        19 
_diffrn_reflns_limit_k_min        -18 
_diffrn_reflns_limit_k_max        20 
_diffrn_reflns_limit_l_min        -21 
_diffrn_reflns_limit_l_max        21 
_diffrn_reflns_theta_min          1.44 
_diffrn_reflns_theta_max          27.48 
_reflns_number_total              13586 
_reflns_number_gt                 11477 
_reflns_threshold_expression      >2sigma(I) 
 
_computing_data_collection        'Bruker SMART, 2006'
_computing_cell_refinement        'Bruker SMART, 2006'
_computing_data_reduction         'Bruker SAINT, 2006'
_computing_structure_solution     'SIR97 (Altomare et al., 1999)'
_computing_structure_refinement   'SHELXL-97 (Sheldrick, 1997)'
_computing_molecular_graphics     'Ortep-3 for Windows (Farrugia, 1997)'
_computing_publication_material   'WinGX publication routines (Farrugia, 1999)'
 
_refine_special_details 
; 
 Refinement of F^2^ against ALL reflections.  The weighted R-factor wR and 
 goodness of fit S are based on F^2^, conventional R-factors R are based 
 on F, with F set to zero for negative F^2^. The threshold expression of 
 F^2^ > 2sigma(F^2^) is used only for calculating R-factors(gt) etc. and is 
 not relevant to the choice of reflections for refinement.  R-factors based 
 on F^2^ are statistically about twice as large as those based on F, and R- 
 factors based on ALL data will be even larger. 
; 
 
loop_
  _platon_squeeze_void_nr
  _platon_squeeze_void_average_x
  _platon_squeeze_void_average_y
  _platon_squeeze_void_average_z
  _platon_squeeze_void_volume
  _platon_squeeze_void_count_electrons
  _platon_squeeze_void_content
   1  0.091  0.409  1.000       704       298 ' '
   2  0.500  1.000  0.500       306       124 ' '
_platon_squeeze_details
;
4 disordered chloroform molecules
;

_refine_ls_structure_factor_coef  Fsqd  
_refine_ls_matrix_type            full 
_refine_ls_weighting_scheme       calc  
_refine_ls_weighting_details 
 'calc w=1/[\s^2^(Fo^2^)+(0.0586P)^2^+0.0000P] where P=(Fo^2^+2Fc^2^)/3' 
_atom_sites_solution_primary      direct 
_atom_sites_solution_secondary    difmap 
_atom_sites_solution_hydrogens    geom 
_refine_ls_hydrogen_treatment     constr 
_refine_ls_extinction_method      none 
_refine_ls_extinction_coef        ? 
_refine_ls_number_reflns          13586 
_refine_ls_number_parameters      523 
_refine_ls_number_restraints      0 
_refine_ls_R_factor_all           0.0365 
_refine_ls_R_factor_gt            0.0307 
_refine_ls_wR_factor_ref          0.1030 
_refine_ls_wR_factor_gt           0.1006 
_refine_ls_goodness_of_fit_ref    1.115 
_refine_ls_restrained_S_all       1.115 
_refine_ls_shift/su_max           0.001 
_refine_ls_shift/su_mean          0.000 
 
loop_ 
 _atom_site_label 
 _atom_site_type_symbol 
 _atom_site_fract_x 
 _atom_site_fract_y 
 _atom_site_fract_z 
 _atom_site_U_iso_or_equiv 
 _atom_site_adp_type 
 _atom_site_occupancy 
 _atom_site_symmetry_multiplicity 
 _atom_site_calc_flag 
 _atom_site_refinement_flags 
 _atom_site_disorder_assembly 
 _atom_site_disorder_group 
I1 I 0.492711(16) 0.274372(15) 0.737124(15) 0.03009(7) Uani 1 1 d . . . 
I2 I -0.178807(15) 0.922325(15) 0.762960(15) 0.02851(6) Uani 1 1 d . . . 
I3 I 0.487547(16) 0.923120(15) 0.781415(15) 0.02920(7) Uani 1 1 d . . . 
F1 F 0.16621(15) 0.60188(14) 0.76302(15) 0.0358(4) Uani 1 1 d . . . 
F2 F 0.16099(15) 0.88535(13) 0.79454(13) 0.0322(4) Uani 1 1 d . . . 
F3 F 0.46131(14) 0.59868(14) 0.78525(14) 0.0337(4) Uani 1 1 d . . . 
C1 C 0.4163(3) 0.4138(2) 0.7538(2) 0.0299(7) Uani 1 1 d . . . 
C2 C 0.3710(2) 0.4956(2) 0.7640(2) 0.0285(7) Uani 1 1 d . . . 
C3 C 0.3157(2) 0.5956(2) 0.7740(2) 0.0239(6) Uani 1 1 d . . . 
C4 C 0.2141(2) 0.6485(2) 0.7722(2) 0.0252(6) Uani 1 1 d . . . 
C5 C 0.1580(2) 0.7460(2) 0.7796(2) 0.0253(6) Uani 1 1 d . . . 
C6 C 0.2109(2) 0.7910(2) 0.7886(2) 0.0239(6) Uani 1 1 d . . . 
C7 C 0.3133(2) 0.7442(2) 0.7907(2) 0.0238(6) Uani 1 1 d . . . 
C8 C 0.3630(2) 0.6457(2) 0.7840(2) 0.0254(6) Uani 1 1 d . . . 
C9 C 0.0539(3) 0.7980(2) 0.7758(2) 0.0304(7) Uani 1 1 d . . . 
C10 C -0.0331(3) 0.8425(2) 0.7723(2) 0.0322(7) Uani 1 1 d . . . 
C11 C 0.3662(3) 0.7960(2) 0.7947(2) 0.0281(7) Uani 1 1 d . . . 
C12 C 0.4105(3) 0.8405(2) 0.7946(2) 0.0303(7) Uani 1 1 d . . . 
P2 P 0.95555(6) 0.25230(6) 0.69465(5) 0.02186(15) Uani 1 1 d . . . 
P1 P 0.78685(6) 0.44942(6) 0.68136(5) 0.02115(15) Uani 1 1 d . . . 
N1 N 0.9014(2) 0.37070(18) 0.67798(17) 0.0245(5) Uani 1 1 d . . . 
C13 C 0.7470(2) 0.4627(2) 0.5889(2) 0.0242(6) Uani 1 1 d . . . 
C14 C 0.8240(3) 0.4427(2) 0.5072(2) 0.0298(7) Uani 1 1 d . . . 
H14 H 0.8935 0.4231 0.5013 0.036 Uiso 1 1 calc R . . 
C15 C 0.7961(3) 0.4522(3) 0.4339(2) 0.0391(8) Uani 1 1 d . . . 
H15 H 0.8473 0.4377 0.3794 0.047 Uiso 1 1 calc R . . 
C16 C 0.6921(3) 0.4833(3) 0.4424(3) 0.0454(10) Uani 1 1 d . . . 
H16 H 0.6736 0.4889 0.3939 0.055 Uiso 1 1 calc R . . 
C17 C 0.6164(3) 0.5057(3) 0.5224(3) 0.0416(9) Uani 1 1 d . . . 
H17 H 0.5469 0.5283 0.5267 0.050 Uiso 1 1 calc R . . 
C18 C 0.6423(3) 0.4950(2) 0.5965(2) 0.0316(7) Uani 1 1 d . . . 
H18 H 0.5906 0.5092 0.6509 0.038 Uiso 1 1 calc R . . 
C19 C 0.6913(2) 0.4186(2) 0.7931(2) 0.0253(6) Uani 1 1 d . . . 
C20 C 0.6447(3) 0.3509(3) 0.8141(2) 0.0322(7) Uani 1 1 d . . . 
H20 H 0.6551 0.3279 0.7670 0.039 Uiso 1 1 calc R . . 
C21 C 0.5825(3) 0.3175(3) 0.9051(3) 0.0412(8) Uani 1 1 d . . . 
H21 H 0.5499 0.2737 0.9182 0.049 Uiso 1 1 calc R . . 
C22 C 0.5688(3) 0.3485(3) 0.9760(2) 0.0442(9) Uani 1 1 d . . . 
H22 H 0.5289 0.3239 1.0372 0.053 Uiso 1 1 calc R . . 
C23 C 0.6141(3) 0.4161(3) 0.9568(2) 0.0422(9) Uani 1 1 d . . . 
H23 H 0.6039 0.4377 1.0047 0.051 Uiso 1 1 calc R . . 
C24 C 0.6752(3) 0.4518(3) 0.8651(2) 0.0317(7) Uani 1 1 d . . . 
H24 H 0.7052 0.4978 0.8519 0.038 Uiso 1 1 calc R . . 
C25 C 0.7863(2) 0.5702(2) 0.6650(2) 0.0253(6) Uani 1 1 d . . . 
C26 C 0.7100(3) 0.6574(2) 0.6346(2) 0.0324(7) Uani 1 1 d . . . 
H26 H 0.6630 0.6538 0.6166 0.039 Uiso 1 1 calc R . . 
C27 C 0.7023(3) 0.7513(3) 0.6303(3) 0.0387(8) Uani 1 1 d . . . 
H27 H 0.6513 0.8099 0.6087 0.046 Uiso 1 1 calc R . . 
C28 C 0.7705(3) 0.7561(3) 0.6581(3) 0.0409(8) Uani 1 1 d . . . 
H28 H 0.7650 0.8183 0.6562 0.049 Uiso 1 1 calc R . . 
C29 C 0.8480(3) 0.6688(3) 0.6893(3) 0.0430(9) Uani 1 1 d . . . 
H29 H 0.8938 0.6728 0.7083 0.052 Uiso 1 1 calc R . . 
C30 C 0.8569(3) 0.5756(3) 0.6920(2) 0.0344(7) Uani 1 1 d . . . 
H30 H 0.9094 0.5173 0.7116 0.041 Uiso 1 1 calc R . . 
C31 C 1.0913(2) 0.2258(2) 0.6673(2) 0.0244(6) Uani 1 1 d . . . 
C32 C 1.1307(3) 0.3033(2) 0.6309(2) 0.0307(7) Uani 1 1 d . . . 
H32 H 1.0872 0.3704 0.6173 0.037 Uiso 1 1 calc R . . 
C33 C 1.2364(3) 0.2804(3) 0.6147(3) 0.0405(8) Uani 1 1 d . . . 
H33 H 1.2627 0.3324 0.5910 0.049 Uiso 1 1 calc R . . 
C34 C 1.3003(3) 0.1824(3) 0.6336(3) 0.0464(9) Uani 1 1 d . . . 
H34 H 1.3699 0.1676 0.6241 0.056 Uiso 1 1 calc R . . 
C35 C 1.2620(3) 0.1039(3) 0.6671(3) 0.0482(10) Uani 1 1 d . . . 
H35 H 1.3065 0.0370 0.6772 0.058 Uiso 1 1 calc R . . 
C36 C 1.1576(3) 0.1262(2) 0.6852(3) 0.0385(8) Uani 1 1 d . . . 
H36 H 1.1314 0.0739 0.7096 0.046 Uiso 1 1 calc R . . 
C37 C 0.9116(3) 0.1776(2) 0.8147(2) 0.0283(7) Uani 1 1 d . . . 
C38 C 0.8756(3) 0.2190(3) 0.8865(2) 0.0378(8) Uani 1 1 d . . . 
H38 H 0.8726 0.2846 0.8721 0.045 Uiso 1 1 calc R . . 
C39 C 0.8442(4) 0.1615(3) 0.9799(3) 0.0542(11) Uani 1 1 d . . . 
H39 H 0.8193 0.1892 1.0280 0.065 Uiso 1 1 calc R . . 
C40 C 0.8497(4) 0.0639(4) 1.0020(3) 0.0644(13) Uani 1 1 d . . . 
H40 H 0.8286 0.0259 1.0648 0.077 Uiso 1 1 calc R . . 
C41 C 0.8865(4) 0.0228(3) 0.9308(3) 0.0629(13) Uani 1 1 d . . . 
H41 H 0.8908 -0.0433 0.9457 0.075 Uiso 1 1 calc R . . 
C42 C 0.9170(3) 0.0789(3) 0.8374(3) 0.0458(9) Uani 1 1 d . . . 
H42 H 0.9411 0.0507 0.7897 0.055 Uiso 1 1 calc R . . 
C43 C 0.9410(2) 0.2069(2) 0.6213(2) 0.0243(6) Uani 1 1 d . . . 
C44 C 1.0180(3) 0.1931(3) 0.5381(2) 0.0372(8) Uani 1 1 d . . . 
H44 H 1.0809 0.2006 0.5225 0.045 Uiso 1 1 calc R . . 
C45 C 1.0013(3) 0.1682(3) 0.4780(3) 0.0516(11) Uani 1 1 d . . . 
H45 H 1.0533 0.1585 0.4223 0.062 Uiso 1 1 calc R . . 
C46 C 0.9080(3) 0.1578(3) 0.5002(3) 0.0471(10) Uani 1 1 d . . . 
H46 H 0.8975 0.1406 0.4596 0.057 Uiso 1 1 calc R . . 
C47 C 0.8304(3) 0.1726(3) 0.5822(3) 0.0392(8) Uani 1 1 d . . . 
H47 H 0.7671 0.1667 0.5965 0.047 Uiso 1 1 calc R . . 
C48 C 0.8469(3) 0.1963(2) 0.6432(2) 0.0305(7) Uani 1 1 d . . . 
H48 H 0.7949 0.2052 0.6992 0.037 Uiso 1 1 calc R . . 
Cl1 Cl 0.39045(6) 0.94203(5) 0.27254(5) 0.02697(15) Uani 1 1 d . . . 
 
loop_ 
 _atom_site_aniso_label 
 _atom_site_aniso_U_11 
 _atom_site_aniso_U_22 
 _atom_site_aniso_U_33 
 _atom_site_aniso_U_23 
 _atom_site_aniso_U_13 
 _atom_site_aniso_U_12 
I1 0.02745(12) 0.02421(11) 0.04254(13) -0.01574(9) -0.01374(9) -0.00344(9) 
I2 0.02125(11) 0.02557(11) 0.03973(12) -0.01316(9) -0.01058(8) -0.00440(8) 
I3 0.02811(12) 0.02965(11) 0.03797(12) -0.01359(9) -0.01313(9) -0.00976(9) 
F1 0.0293(10) 0.0294(10) 0.0580(13) -0.0172(9) -0.0168(9) -0.0097(8) 
F2 0.0341(11) 0.0208(9) 0.0429(11) -0.0134(8) -0.0154(9) -0.0030(8) 
F3 0.0248(10) 0.0319(10) 0.0488(11) -0.0165(9) -0.0177(9) -0.0027(8) 
C1 0.0247(16) 0.0261(16) 0.0408(18) -0.0126(14) -0.0146(14) -0.0034(13) 
C2 0.0259(16) 0.0264(16) 0.0351(17) -0.0083(13) -0.0122(13) -0.0086(13) 
C3 0.0240(15) 0.0215(14) 0.0244(14) -0.0052(11) -0.0079(12) -0.0077(12) 
C4 0.0264(16) 0.0233(14) 0.0289(15) -0.0069(12) -0.0086(12) -0.0115(13) 
C5 0.0222(15) 0.0225(14) 0.0309(16) -0.0077(12) -0.0095(12) -0.0064(12) 
C6 0.0270(16) 0.0195(14) 0.0264(15) -0.0085(11) -0.0080(12) -0.0074(12) 
C7 0.0234(15) 0.0246(15) 0.0249(14) -0.0083(12) -0.0059(12) -0.0099(12) 
C8 0.0207(15) 0.0264(15) 0.0267(15) -0.0071(12) -0.0081(12) -0.0064(12) 
C9 0.0295(18) 0.0229(15) 0.0388(18) -0.0096(13) -0.0088(14) -0.0103(14) 
C10 0.0257(18) 0.0276(16) 0.0447(19) -0.0140(14) -0.0125(14) -0.0053(14) 
C11 0.0303(17) 0.0259(15) 0.0288(16) -0.0083(12) -0.0102(13) -0.0089(14) 
C12 0.0296(17) 0.0309(16) 0.0317(16) -0.0094(13) -0.0113(13) -0.0094(14) 
P2 0.0231(4) 0.0207(4) 0.0222(4) -0.0059(3) -0.0076(3) -0.0078(3) 
P1 0.0193(4) 0.0221(4) 0.0222(4) -0.0067(3) -0.0063(3) -0.0072(3) 
N1 0.0239(13) 0.0237(12) 0.0281(13) -0.0087(10) -0.0071(10) -0.0096(11) 
C13 0.0289(16) 0.0211(14) 0.0234(14) -0.0052(11) -0.0097(12) -0.0088(13) 
C14 0.0326(18) 0.0250(15) 0.0270(16) -0.0065(12) -0.0112(13) -0.0055(13) 
C15 0.057(2) 0.0331(18) 0.0227(16) -0.0059(14) -0.0143(16) -0.0129(17) 
C16 0.068(3) 0.044(2) 0.037(2) -0.0079(16) -0.030(2) -0.019(2) 
C17 0.040(2) 0.046(2) 0.053(2) -0.0146(17) -0.0278(18) -0.0125(17) 
C18 0.0284(17) 0.0354(17) 0.0352(17) -0.0129(14) -0.0118(14) -0.0099(14) 
C19 0.0186(15) 0.0269(15) 0.0266(15) -0.0061(12) -0.0084(12) -0.0053(12) 
C20 0.0291(18) 0.0393(18) 0.0293(16) -0.0069(14) -0.0078(13) -0.0168(15) 
C21 0.0315(19) 0.049(2) 0.0380(19) -0.0046(16) -0.0081(15) -0.0204(17) 
C22 0.0290(19) 0.059(2) 0.0269(17) -0.0012(16) -0.0044(14) -0.0165(18) 
C23 0.035(2) 0.057(2) 0.0288(18) -0.0160(16) -0.0063(15) -0.0116(18) 
C24 0.0281(17) 0.0357(17) 0.0280(16) -0.0115(13) -0.0074(13) -0.0076(14) 
C25 0.0237(15) 0.0259(15) 0.0246(15) -0.0105(12) -0.0043(12) -0.0074(13) 
C26 0.0331(18) 0.0296(16) 0.0386(18) -0.0140(14) -0.0138(15) -0.0075(14) 
C27 0.038(2) 0.0253(16) 0.046(2) -0.0136(15) -0.0120(16) -0.0039(15) 
C28 0.050(2) 0.0334(18) 0.045(2) -0.0185(16) -0.0075(17) -0.0188(17) 
C29 0.048(2) 0.044(2) 0.053(2) -0.0138(17) -0.0201(18) -0.0232(18) 
C30 0.0372(19) 0.0325(18) 0.0395(18) -0.0089(14) -0.0154(15) -0.0147(15) 
C31 0.0233(15) 0.0237(14) 0.0279(15) -0.0092(12) -0.0114(12) -0.0045(12) 
C32 0.0245(16) 0.0229(15) 0.0346(17) -0.0034(13) -0.0089(13) -0.0057(13) 
C33 0.0256(18) 0.0388(19) 0.056(2) -0.0129(17) -0.0107(16) -0.0135(16) 
C34 0.0257(19) 0.049(2) 0.065(3) -0.0216(19) -0.0215(18) -0.0018(17) 
C35 0.038(2) 0.0283(18) 0.082(3) -0.0203(19) -0.035(2) 0.0055(16) 
C36 0.037(2) 0.0226(16) 0.059(2) -0.0124(15) -0.0231(17) -0.0047(15) 
C37 0.0321(17) 0.0267(15) 0.0227(15) -0.0036(12) -0.0094(13) -0.0103(14) 
C38 0.042(2) 0.0353(18) 0.0302(17) -0.0121(14) -0.0133(15) -0.0040(16) 
C39 0.065(3) 0.059(3) 0.0260(19) -0.0116(18) -0.0124(19) -0.014(2) 
C40 0.078(3) 0.071(3) 0.027(2) 0.004(2) -0.010(2) -0.036(3) 
C41 0.093(4) 0.052(3) 0.043(2) 0.008(2) -0.020(2) -0.045(3) 
C42 0.069(3) 0.039(2) 0.0316(18) -0.0015(15) -0.0133(18) -0.030(2) 
C43 0.0308(17) 0.0210(14) 0.0219(14) -0.0034(11) -0.0091(12) -0.0112(13) 
C44 0.0320(19) 0.054(2) 0.0347(18) -0.0216(16) -0.0015(14) -0.0217(17) 
C45 0.053(3) 0.078(3) 0.040(2) -0.036(2) 0.0033(19) -0.034(2) 
C46 0.060(3) 0.063(3) 0.041(2) -0.0180(18) -0.0164(19) -0.035(2) 
C47 0.045(2) 0.046(2) 0.0390(19) -0.0067(16) -0.0143(16) -0.0290(18) 
C48 0.0316(18) 0.0327(17) 0.0282(16) -0.0080(13) -0.0053(13) -0.0163(14) 
Cl1 0.0255(4) 0.0239(3) 0.0337(4) -0.0096(3) -0.0111(3) -0.0072(3) 
 
_geom_special_details 
; 
 All esds (except the esd in the dihedral angle between two l.s. planes) 
 are estimated using the full covariance matrix.  The cell esds are taken 
 into account individually in the estimation of esds in distances, angles 
 and torsion angles; correlations between esds in cell parameters are only 
 used when they are defined by crystal symmetry.  An approximate (isotropic) 
 treatment of cell esds is used for estimating esds involving l.s. planes. 
; 
 
loop_ 
 _geom_bond_atom_site_label_1 
 _geom_bond_atom_site_label_2 
 _geom_bond_distance 
 _geom_bond_site_symmetry_2 
 _geom_bond_publ_flag 
I1 C1 2.023(3) . ? 
I2 C10 2.021(3) . ? 
I3 C12 2.025(3) . ? 
F1 C4 1.349(3) . ? 
F2 C6 1.338(3) . ? 
F3 C8 1.335(3) . ? 
C1 C2 1.191(4) . ? 
C2 C3 1.439(4) . ? 
C3 C4 1.385(4) . ? 
C3 C8 1.397(4) . ? 
C4 C5 1.393(4) . ? 
C5 C6 1.393(4) . ? 
C5 C9 1.425(4) . ? 
C6 C7 1.394(4) . ? 
C7 C8 1.399(4) . ? 
C7 C11 1.435(4) . ? 
C9 C10 1.193(5) . ? 
C11 C12 1.186(4) . ? 
P2 N1 1.586(3) . ? 
P2 C31 1.792(3) . ? 
P2 C37 1.798(3) . ? 
P2 C43 1.807(3) . ? 
P1 N1 1.593(3) . ? 
P1 C25 1.792(3) . ? 
P1 C19 1.797(3) . ? 
P1 C13 1.802(3) . ? 
C13 C14 1.389(4) . ? 
C13 C18 1.399(4) . ? 
C14 C15 1.398(4) . ? 
C14 H14 0.9300 . ? 
C15 C16 1.388(6) . ? 
C15 H15 0.9300 . ? 
C16 C17 1.374(6) . ? 
C16 H16 0.9300 . ? 
C17 C18 1.384(5) . ? 
C17 H17 0.9300 . ? 
C18 H18 0.9300 . ? 
C19 C20 1.389(4) . ? 
C19 C24 1.400(4) . ? 
C20 C21 1.388(5) . ? 
C20 H20 0.9300 . ? 
C21 C22 1.375(5) . ? 
C21 H21 0.9300 . ? 
C22 C23 1.381(6) . ? 
C22 H22 0.9300 . ? 
C23 C24 1.396(5) . ? 
C23 H23 0.9300 . ? 
C24 H24 0.9300 . ? 
C25 C26 1.378(4) . ? 
C25 C30 1.396(4) . ? 
C26 C27 1.396(5) . ? 
C26 H26 0.9300 . ? 
C27 C28 1.367(5) . ? 
C27 H27 0.9300 . ? 
C28 C29 1.393(5) . ? 
C28 H28 0.9300 . ? 
C29 C30 1.389(5) . ? 
C29 H29 0.9300 . ? 
C30 H30 0.9300 . ? 
C31 C32 1.384(4) . ? 
C31 C36 1.386(4) . ? 
C32 C33 1.404(5) . ? 
C32 H32 0.9300 . ? 
C33 C34 1.359(5) . ? 
C33 H33 0.9300 . ? 
C34 C35 1.395(6) . ? 
C34 H34 0.9300 . ? 
C35 C36 1.381(5) . ? 
C35 H35 0.9300 . ? 
C36 H36 0.9300 . ? 
C37 C38 1.392(4) . ? 
C37 C42 1.393(5) . ? 
C38 C39 1.388(5) . ? 
C38 H38 0.9300 . ? 
C39 C40 1.378(6) . ? 
C39 H39 0.9300 . ? 
C40 C41 1.377(7) . ? 
C40 H40 0.9300 . ? 
C41 C42 1.380(5) . ? 
C41 H41 0.9300 . ? 
C42 H42 0.9300 . ? 
C43 C44 1.383(5) . ? 
C43 C48 1.393(4) . ? 
C44 C45 1.384(5) . ? 
C44 H44 0.9300 . ? 
C45 C46 1.379(5) . ? 
C45 H45 0.9300 . ? 
C46 C47 1.376(6) . ? 
C46 H46 0.9300 . ? 
C47 C48 1.384(5) . ? 
C47 H47 0.9300 . ? 
C48 H48 0.9300 . ? 
 
loop_ 
 _geom_angle_atom_site_label_1 
 _geom_angle_atom_site_label_2 
 _geom_angle_atom_site_label_3 
 _geom_angle 
 _geom_angle_site_symmetry_1 
 _geom_angle_site_symmetry_3 
 _geom_angle_publ_flag 
C2 C1 I1 179.7(4) . . ? 
C1 C2 C3 178.4(3) . . ? 
C4 C3 C8 116.2(3) . . ? 
C4 C3 C2 122.3(3) . . ? 
C8 C3 C2 121.5(3) . . ? 
F1 C4 C3 117.6(3) . . ? 
F1 C4 C5 117.9(3) . . ? 
C3 C4 C5 124.5(3) . . ? 
C6 C5 C4 115.7(3) . . ? 
C6 C5 C9 121.8(3) . . ? 
C4 C5 C9 122.4(3) . . ? 
F2 C6 C5 118.1(3) . . ? 
F2 C6 C7 117.9(3) . . ? 
C5 C6 C7 124.0(3) . . ? 
C6 C7 C8 116.3(3) . . ? 
C6 C7 C11 121.7(3) . . ? 
C8 C7 C11 121.9(3) . . ? 
F3 C8 C3 118.7(3) . . ? 
F3 C8 C7 117.9(3) . . ? 
C3 C8 C7 123.3(3) . . ? 
C10 C9 C5 179.2(3) . . ? 
C9 C10 I2 177.9(3) . . ? 
C12 C11 C7 177.6(3) . . ? 
C11 C12 I3 174.6(3) . . ? 
N1 P2 C31 106.46(14) . . ? 
N1 P2 C37 113.68(14) . . ? 
C31 P2 C37 107.25(14) . . ? 
N1 P2 C43 114.34(13) . . ? 
C31 P2 C43 108.03(14) . . ? 
C37 P2 C43 106.74(14) . . ? 
N1 P1 C25 107.98(14) . . ? 
N1 P1 C19 113.37(13) . . ? 
C25 P1 C19 106.01(14) . . ? 
N1 P1 C13 111.79(14) . . ? 
C25 P1 C13 108.26(13) . . ? 
C19 P1 C13 109.15(14) . . ? 
P2 N1 P1 135.71(17) . . ? 
C14 C13 C18 120.2(3) . . ? 
C14 C13 P1 117.9(2) . . ? 
C18 C13 P1 121.9(2) . . ? 
C13 C14 C15 119.5(3) . . ? 
C13 C14 H14 120.2 . . ? 
C15 C14 H14 120.2 . . ? 
C16 C15 C14 119.9(3) . . ? 
C16 C15 H15 120.0 . . ? 
C14 C15 H15 120.0 . . ? 
C17 C16 C15 120.1(3) . . ? 
C17 C16 H16 120.0 . . ? 
C15 C16 H16 120.0 . . ? 
C16 C17 C18 120.9(3) . . ? 
C16 C17 H17 119.5 . . ? 
C18 C17 H17 119.5 . . ? 
C17 C18 C13 119.3(3) . . ? 
C17 C18 H18 120.3 . . ? 
C13 C18 H18 120.3 . . ? 
C20 C19 C24 119.0(3) . . ? 
C20 C19 P1 121.4(2) . . ? 
C24 C19 P1 118.9(2) . . ? 
C21 C20 C19 120.2(3) . . ? 
C21 C20 H20 119.9 . . ? 
C19 C20 H20 119.9 . . ? 
C22 C21 C20 120.5(4) . . ? 
C22 C21 H21 119.7 . . ? 
C20 C21 H21 119.7 . . ? 
C21 C22 C23 120.3(3) . . ? 
C21 C22 H22 119.8 . . ? 
C23 C22 H22 119.8 . . ? 
C22 C23 C24 119.7(3) . . ? 
C22 C23 H23 120.2 . . ? 
C24 C23 H23 120.2 . . ? 
C23 C24 C19 120.3(3) . . ? 
C23 C24 H24 119.9 . . ? 
C19 C24 H24 119.9 . . ? 
C26 C25 C30 119.7(3) . . ? 
C26 C25 P1 120.0(2) . . ? 
C30 C25 P1 120.0(2) . . ? 
C25 C26 C27 120.8(3) . . ? 
C25 C26 H26 119.6 . . ? 
C27 C26 H26 119.6 . . ? 
C28 C27 C26 119.4(3) . . ? 
C28 C27 H27 120.3 . . ? 
C26 C27 H27 120.3 . . ? 
C27 C28 C29 120.6(3) . . ? 
C27 C28 H28 119.7 . . ? 
C29 C28 H28 119.7 . . ? 
C30 C29 C28 120.1(3) . . ? 
C30 C29 H29 120.0 . . ? 
C28 C29 H29 120.0 . . ? 
C29 C30 C25 119.4(3) . . ? 
C29 C30 H30 120.3 . . ? 
C25 C30 H30 120.3 . . ? 
C32 C31 C36 119.4(3) . . ? 
C32 C31 P2 120.9(2) . . ? 
C36 C31 P2 119.7(3) . . ? 
C31 C32 C33 119.9(3) . . ? 
C31 C32 H32 120.1 . . ? 
C33 C32 H32 120.1 . . ? 
C34 C33 C32 120.1(3) . . ? 
C34 C33 H33 119.9 . . ? 
C32 C33 H33 119.9 . . ? 
C33 C34 C35 120.4(3) . . ? 
C33 C34 H34 119.8 . . ? 
C35 C34 H34 119.8 . . ? 
C36 C35 C34 119.5(3) . . ? 
C36 C35 H35 120.3 . . ? 
C34 C35 H35 120.3 . . ? 
C35 C36 C31 120.7(3) . . ? 
C35 C36 H36 119.7 . . ? 
C31 C36 H36 119.7 . . ? 
C38 C37 C42 119.7(3) . . ? 
C38 C37 P2 118.4(2) . . ? 
C42 C37 P2 121.9(3) . . ? 
C39 C38 C37 119.3(4) . . ? 
C39 C38 H38 120.3 . . ? 
C37 C38 H38 120.3 . . ? 
C40 C39 C38 120.8(4) . . ? 
C40 C39 H39 119.6 . . ? 
C38 C39 H39 119.6 . . ? 
C41 C40 C39 119.6(4) . . ? 
C41 C40 H40 120.2 . . ? 
C39 C40 H40 120.2 . . ? 
C40 C41 C42 120.6(4) . . ? 
C40 C41 H41 119.7 . . ? 
C42 C41 H41 119.7 . . ? 
C41 C42 C37 119.9(4) . . ? 
C41 C42 H42 120.0 . . ? 
C37 C42 H42 120.0 . . ? 
C44 C43 C48 119.5(3) . . ? 
C44 C43 P2 120.6(2) . . ? 
C48 C43 P2 119.6(2) . . ? 
C43 C44 C45 119.8(3) . . ? 
C43 C44 H44 120.1 . . ? 
C45 C44 H44 120.1 . . ? 
C46 C45 C44 120.5(4) . . ? 
C46 C45 H45 119.8 . . ? 
C44 C45 H45 119.8 . . ? 
C47 C46 C45 120.2(3) . . ? 
C47 C46 H46 119.9 . . ? 
C45 C46 H46 119.9 . . ? 
C46 C47 C48 119.8(3) . . ? 
C46 C47 H47 120.1 . . ? 
C48 C47 H47 120.1 . . ? 
C47 C48 C43 120.3(3) . . ? 
C47 C48 H48 119.9 . . ? 
C43 C48 H48 119.9 . . ? 
 
loop_ 
 _geom_torsion_atom_site_label_1 
 _geom_torsion_atom_site_label_2 
 _geom_torsion_atom_site_label_3 
 _geom_torsion_atom_site_label_4 
 _geom_torsion 
 _geom_torsion_site_symmetry_1 
 _geom_torsion_site_symmetry_2 
 _geom_torsion_site_symmetry_3 
 _geom_torsion_site_symmetry_4 
 _geom_torsion_publ_flag 
I1 C1 C2 C3 -137(54) . . . . ? 
C1 C2 C3 C4 54(14) . . . . ? 
C1 C2 C3 C8 -124(14) . . . . ? 
C8 C3 C4 F1 -179.7(3) . . . . ? 
C2 C3 C4 F1 1.8(4) . . . . ? 
C8 C3 C4 C5 -0.1(5) . . . . ? 
C2 C3 C4 C5 -178.6(3) . . . . ? 
F1 C4 C5 C6 -179.8(3) . . . . ? 
C3 C4 C5 C6 0.6(5) . . . . ? 
F1 C4 C5 C9 -1.4(5) . . . . ? 
C3 C4 C5 C9 179.0(3) . . . . ? 
C4 C5 C6 F2 179.0(3) . . . . ? 
C9 C5 C6 F2 0.6(4) . . . . ? 
C4 C5 C6 C7 -0.2(4) . . . . ? 
C9 C5 C6 C7 -178.7(3) . . . . ? 
F2 C6 C7 C8 -179.8(3) . . . . ? 
C5 C6 C7 C8 -0.6(4) . . . . ? 
F2 C6 C7 C11 -2.9(4) . . . . ? 
C5 C6 C7 C11 176.4(3) . . . . ? 
C4 C3 C8 F3 -179.3(3) . . . . ? 
C2 C3 C8 F3 -0.8(4) . . . . ? 
C4 C3 C8 C7 -0.8(4) . . . . ? 
C2 C3 C8 C7 177.8(3) . . . . ? 
C6 C7 C8 F3 179.6(3) . . . . ? 
C11 C7 C8 F3 2.7(4) . . . . ? 
C6 C7 C8 C3 1.1(4) . . . . ? 
C11 C7 C8 C3 -175.9(3) . . . . ? 
C6 C5 C9 C10 19(29) . . . . ? 
C4 C5 C9 C10 -159(100) . . . . ? 
C5 C9 C10 I2 28(36) . . . . ? 
C6 C7 C11 C12 -80(9) . . . . ? 
C8 C7 C11 C12 97(9) . . . . ? 
C7 C11 C12 I3 3(11) . . . . ? 
C31 P2 N1 P1 175.6(2) . . . . ? 
C37 P2 N1 P1 -66.6(3) . . . . ? 
C43 P2 N1 P1 56.4(3) . . . . ? 
C25 P1 N1 P2 174.2(2) . . . . ? 
C19 P1 N1 P2 57.1(3) . . . . ? 
C13 P1 N1 P2 -66.8(3) . . . . ? 
N1 P1 C13 C14 -26.3(3) . . . . ? 
C25 P1 C13 C14 92.5(3) . . . . ? 
C19 P1 C13 C14 -152.5(2) . . . . ? 
N1 P1 C13 C18 155.7(2) . . . . ? 
C25 P1 C13 C18 -85.5(3) . . . . ? 
C19 P1 C13 C18 29.4(3) . . . . ? 
C18 C13 C14 C15 -1.9(5) . . . . ? 
P1 C13 C14 C15 -180.0(2) . . . . ? 
C13 C14 C15 C16 1.2(5) . . . . ? 
C14 C15 C16 C17 0.6(6) . . . . ? 
C15 C16 C17 C18 -1.8(6) . . . . ? 
C16 C17 C18 C13 1.2(6) . . . . ? 
C14 C13 C18 C17 0.7(5) . . . . ? 
P1 C13 C18 C17 178.7(3) . . . . ? 
N1 P1 C19 C20 -84.6(3) . . . . ? 
C25 P1 C19 C20 157.1(3) . . . . ? 
C13 P1 C19 C20 40.7(3) . . . . ? 
N1 P1 C19 C24 85.8(3) . . . . ? 
C25 P1 C19 C24 -32.5(3) . . . . ? 
C13 P1 C19 C24 -148.9(2) . . . . ? 
C24 C19 C20 C21 0.4(5) . . . . ? 
P1 C19 C20 C21 170.8(3) . . . . ? 
C19 C20 C21 C22 -1.9(5) . . . . ? 
C20 C21 C22 C23 2.1(6) . . . . ? 
C21 C22 C23 C24 -0.9(6) . . . . ? 
C22 C23 C24 C19 -0.6(5) . . . . ? 
C20 C19 C24 C23 0.8(5) . . . . ? 
P1 C19 C24 C23 -169.8(3) . . . . ? 
N1 P1 C25 C26 158.9(3) . . . . ? 
C19 P1 C25 C26 -79.3(3) . . . . ? 
C13 P1 C25 C26 37.7(3) . . . . ? 
N1 P1 C25 C30 -27.4(3) . . . . ? 
C19 P1 C25 C30 94.4(3) . . . . ? 
C13 P1 C25 C30 -148.6(3) . . . . ? 
C30 C25 C26 C27 0.0(5) . . . . ? 
P1 C25 C26 C27 173.7(3) . . . . ? 
C25 C26 C27 C28 -1.0(5) . . . . ? 
C26 C27 C28 C29 0.9(6) . . . . ? 
C27 C28 C29 C30 0.2(6) . . . . ? 
C28 C29 C30 C25 -1.2(6) . . . . ? 
C26 C25 C30 C29 1.1(5) . . . . ? 
P1 C25 C30 C29 -172.6(3) . . . . ? 
N1 P2 C31 C32 -5.1(3) . . . . ? 
C37 P2 C31 C32 -127.2(3) . . . . ? 
C43 P2 C31 C32 118.1(3) . . . . ? 
N1 P2 C31 C36 173.0(3) . . . . ? 
C37 P2 C31 C36 51.0(3) . . . . ? 
C43 P2 C31 C36 -63.8(3) . . . . ? 
C36 C31 C32 C33 -1.5(5) . . . . ? 
P2 C31 C32 C33 176.6(3) . . . . ? 
C31 C32 C33 C34 0.7(6) . . . . ? 
C32 C33 C34 C35 1.5(6) . . . . ? 
C33 C34 C35 C36 -3.0(7) . . . . ? 
C34 C35 C36 C31 2.2(6) . . . . ? 
C32 C31 C36 C35 0.0(5) . . . . ? 
P2 C31 C36 C35 -178.2(3) . . . . ? 
N1 P2 C37 C38 -27.9(3) . . . . ? 
C31 P2 C37 C38 89.5(3) . . . . ? 
C43 P2 C37 C38 -155.0(3) . . . . ? 
N1 P2 C37 C42 154.9(3) . . . . ? 
C31 P2 C37 C42 -87.7(3) . . . . ? 
C43 P2 C37 C42 27.9(3) . . . . ? 
C42 C37 C38 C39 -0.8(6) . . . . ? 
P2 C37 C38 C39 -178.1(3) . . . . ? 
C37 C38 C39 C40 0.8(6) . . . . ? 
C38 C39 C40 C41 -0.1(7) . . . . ? 
C39 C40 C41 C42 -0.6(8) . . . . ? 
C40 C41 C42 C37 0.6(7) . . . . ? 
C38 C37 C42 C41 0.1(6) . . . . ? 
P2 C37 C42 C41 177.3(4) . . . . ? 
N1 P2 C43 C44 96.2(3) . . . . ? 
C31 P2 C43 C44 -22.1(3) . . . . ? 
C37 P2 C43 C44 -137.2(3) . . . . ? 
N1 P2 C43 C48 -76.7(3) . . . . ? 
C31 P2 C43 C48 165.0(2) . . . . ? 
C37 P2 C43 C48 50.0(3) . . . . ? 
C48 C43 C44 C45 -0.5(5) . . . . ? 
P2 C43 C44 C45 -173.4(3) . . . . ? 
C43 C44 C45 C46 0.5(6) . . . . ? 
C44 C45 C46 C47 0.4(7) . . . . ? 
C45 C46 C47 C48 -1.2(6) . . . . ? 
C46 C47 C48 C43 1.1(5) . . . . ? 
C44 C43 C48 C47 -0.3(5) . . . . ? 
P2 C43 C48 C47 172.7(3) . . . . ? 
 
_diffrn_measured_fraction_theta_max    0.982 
_diffrn_reflns_theta_full              27.48 
_diffrn_measured_fraction_theta_full   0.982 
_refine_diff_density_max    0.675 
_refine_diff_density_min   -0.675 
_refine_diff_density_rms    0.117 

#===END


data_1-1-Bu4NBr 
 
_audit_creation_method            SHELXL-97 
_chemical_name_systematic 
; 
 ? 
; 
_chemical_name_common             ? 
_chemical_melting_point           ? 
_chemical_formula_moiety          
'2(C12 F3 I3), C16 H36 N, Br'
_chemical_formula_sum 
 'C40 H36 Br F6 I6 N' 
_chemical_formula_weight          1486.01 
 
loop_ 
 _atom_type_symbol 
 _atom_type_description 
 _atom_type_scat_dispersion_real 
 _atom_type_scat_dispersion_imag 
 _atom_type_scat_source 
 'C'  'C'   0.0033   0.0016 
 'International Tables Vol C Tables 4.2.6.8 and 6.1.1.4' 
 'H'  'H'   0.0000   0.0000 
 'International Tables Vol C Tables 4.2.6.8 and 6.1.1.4' 
 'N'  'N'   0.0061   0.0033 
 'International Tables Vol C Tables 4.2.6.8 and 6.1.1.4' 
 'F'  'F'   0.0171   0.0103 
 'International Tables Vol C Tables 4.2.6.8 and 6.1.1.4' 
 'Br'  'Br'  -0.2901   2.4595 
 'International Tables Vol C Tables 4.2.6.8 and 6.1.1.4' 
 'I'  'I'  -0.4742   1.8119 
 'International Tables Vol C Tables 4.2.6.8 and 6.1.1.4' 
 
_symmetry_cell_setting            monoclinic 
_symmetry_space_group_name_H-M    'C 2/c' 
_symmetry_space_group_name_Hall   '-C 2yc'
 
loop_ 
 _symmetry_equiv_pos_as_xyz 
 'x, y, z' 
 '-x, y, -z+1/2' 
 'x+1/2, y+1/2, z' 
 '-x+1/2, y+1/2, -z+1/2' 
 '-x, -y, -z' 
 'x, -y, z-1/2' 
 '-x+1/2, -y+1/2, -z' 
 'x+1/2, -y+1/2, z-1/2' 
 
_cell_length_a                    8.88340(10) 
_cell_length_b                    21.3386(4) 
_cell_length_c                    25.8119(5) 
_cell_angle_alpha                 90.00 
_cell_angle_beta                  95.6600(10) 
_cell_angle_gamma                 90.00 
_cell_volume                      4869.03(14) 
_cell_formula_units_Z             4 
_cell_measurement_temperature     293(2) 
_cell_measurement_reflns_used     13858 
_cell_measurement_theta_min       3.6011 
_cell_measurement_theta_max        27.4986 
 
_exptl_crystal_description        prism 
_exptl_crystal_colour             white
_exptl_crystal_size_max           0.57 
_exptl_crystal_size_mid           0.15
_exptl_crystal_size_min           0.05 
_exptl_crystal_density_meas       ? 
_exptl_crystal_density_diffrn     2.027 
_exptl_crystal_density_method     'not measured' 
_exptl_crystal_F_000              2760 
_exptl_absorpt_coefficient_mu     4.698 
_exptl_absorpt_correction_type                            multi-scan
_exptl_absorpt_process_details
;
  [Sheldrick, G.M. (2002). SADABS Bruker AXS Inc., Madison, Wisconsin, USA]
;
_exptl_absorpt_correction_T_min                      0.434

_exptl_absorpt_correction_T_max                      0.791


#----------------------------- Remark ------------------------------#
# SADABS output:                                                    #
# Estimated minimum and maximum transmission:  0.4388  0.7456#
# The ratio of these values is more reliable than their absolute values!  #
#-------------------------------------------------------------------#
 
_exptl_special_details 
; 
 ? 
; 
 
_diffrn_ambient_temperature       293(2)
_diffrn_radiation_wavelength      0.71073
_diffrn_radiation_type            MoK\a
_diffrn_radiation_source          'fine-focus sealed tube'
_diffrn_measurement_device_type   'KappaCCD'
_diffrn_measurement_device        '95mm CCD camera on \k-goniostat'
_diffrn_detector_area_resol_mean  9
_diffrn_radiation_monochromator   'horizonally mounted graphite crystal'
_diffrn_measurement_method        'CCD'
_diffrn_standards_number          ? 
_diffrn_standards_interval_count  ? 
_diffrn_standards_interval_time   ? 
_diffrn_standards_decay_%         ? 
_diffrn_reflns_number             42708 
_diffrn_reflns_av_R_equivalents   0.0580 
_diffrn_reflns_av_sigmaI/netI     0.0489 
_diffrn_reflns_limit_h_min        -11 
_diffrn_reflns_limit_h_max        11 
_diffrn_reflns_limit_k_min        -27 
_diffrn_reflns_limit_k_max        27 
_diffrn_reflns_limit_l_min        -33 
_diffrn_reflns_limit_l_max        33 
_diffrn_reflns_theta_min          3.60 
_diffrn_reflns_theta_max          27.50 
_reflns_number_total              5518 
_reflns_number_gt                 3222 
_reflns_threshold_expression      >2sigma(I) 
 
_computing_data_collection        'Collect (Bruker AXS BV, 1997-2004)'
_computing_cell_refinement        'Dirax/lsq (Duisenberg & Schreurs, 1989-2000)'
_computing_data_reduction         'EvalCCD (Duisenberg & Schreurs 1990-2000)'
_computing_structure_solution     'SIR92 (Altomare et al., 1993)'
_computing_structure_refinement   'SHELXL-97 (Sheldrick, 1997)'
_computing_molecular_graphics     'Ortep-3 for Windows (Farrugia, 1997)'
_computing_publication_material   'WinGX publication routines (Farrugia, 1999)'
 
_refine_special_details 
; 
 Refinement of F^2^ against ALL reflections.  The weighted R-factor wR and 
 goodness of fit S are based on F^2^, conventional R-factors R are based 
 on F, with F set to zero for negative F^2^. The threshold expression of 
 F^2^ > 2sigma(F^2^) is used only for calculating R-factors(gt) etc. and is 
 not relevant to the choice of reflections for refinement.  R-factors based 
 on F^2^ are statistically about twice as large as those based on F, and R- 
 factors based on ALL data will be even larger. 
; 
 
_refine_ls_structure_factor_coef  Fsqd  
_refine_ls_matrix_type            full 
_refine_ls_weighting_scheme       calc  
_refine_ls_weighting_details 
 'calc w=1/[\s^2^(Fo^2^)+(0.0147P)^2^+43.1013P] where P=(Fo^2^+2Fc^2^)/3' 
_atom_sites_solution_primary      direct 
_atom_sites_solution_secondary    difmap 
_atom_sites_solution_hydrogens    geom 
_refine_ls_hydrogen_treatment     constr 
_refine_ls_extinction_method      none 
_refine_ls_extinction_coef        ? 
_refine_ls_number_reflns          5518 
_refine_ls_number_parameters      245 
_refine_ls_number_restraints      1 
_refine_ls_R_factor_all           0.1123 
_refine_ls_R_factor_gt            0.0491 
_refine_ls_wR_factor_ref          0.0944 
_refine_ls_wR_factor_gt           0.0769 
_refine_ls_goodness_of_fit_ref    1.069 
_refine_ls_restrained_S_all       1.071 
_refine_ls_shift/su_max           0.042 
_refine_ls_shift/su_mean          0.002 
 
loop_ 
 _atom_site_label 
 _atom_site_type_symbol 
 _atom_site_fract_x 
 _atom_site_fract_y 
 _atom_site_fract_z 
 _atom_site_U_iso_or_equiv 
 _atom_site_adp_type 
 _atom_site_occupancy 
 _atom_site_symmetry_multiplicity 
 _atom_site_calc_flag 
 _atom_site_refinement_flags 
 _atom_site_disorder_assembly 
 _atom_site_disorder_group 
I001 I 0.11330(5) 0.87326(2) 0.860057(18) 0.05629(14) Uani 1 1 d . . . 
I002 I 0.84830(7) 0.93479(3) 1.18464(2) 0.07915(19) Uani 1 1 d . . . 
I003 I 0.73965(8) 0.49185(3) 0.98284(3) 0.1066(3) Uani 1 1 d . . . 
F1 F 0.4672(5) 0.87562(17) 1.03782(17) 0.0736(12) Uani 1 1 d . . . 
F2 F 0.7685(4) 0.70451(18) 1.09377(15) 0.0679(11) Uani 1 1 d . . . 
F3 F 0.4246(5) 0.68762(19) 0.94464(16) 0.0761(12) Uani 1 1 d . . . 
C1 C 0.2422(8) 0.8333(3) 0.9198(3) 0.0554(17) Uani 1 1 d . . . 
C2 C 0.3309(8) 0.8110(3) 0.9518(3) 0.0544(17) Uani 1 1 d . . . 
C3 C 0.4407(7) 0.7830(3) 0.9899(3) 0.0495(16) Uani 1 1 d . . . 
C4 C 0.5092(7) 0.8162(3) 1.0320(3) 0.0524(16) Uani 1 1 d . . . 
C5 C 0.6206(7) 0.7917(3) 1.0684(2) 0.0497(16) Uani 1 1 d . . . 
C6 C 0.6601(7) 0.7302(3) 1.0601(3) 0.0478(16) Uani 1 1 d . . . 
C7 C 0.5972(7) 0.6929(3) 1.0192(2) 0.0474(15) Uani 1 1 d . . . 
C8 C 0.4876(7) 0.7214(3) 0.9851(3) 0.0510(16) Uani 1 1 d . . . 
C9 C 0.7510(9) 0.8668(4) 1.1383(3) 0.069(2) Uani 1 1 d . . . 
C10 C 0.6936(8) 0.8304(3) 1.1086(3) 0.0601(19) Uani 1 1 d . . . 
C11 C 0.6810(9) 0.5776(3) 1.0015(3) 0.069(2) Uani 1 1 d . . . 
C12 C 0.6452(8) 0.6296(3) 1.0109(3) 0.0567(17) Uani 1 1 d . . . 
Br1 Br 0.0000 0.94230(5) 0.7500 0.0659(3) Uani 1 2 d S . . 
N1 N 0.5000 0.8282(5) 0.7500 0.072(3) Uani 1 2 d S . . 
C13 C 0.3581(9) 0.7883(5) 0.7470(4) 0.088(3) Uani 1 1 d . . . 
H13A H 0.2716 0.8160 0.7473 0.106 Uiso 1 1 calc R . . 
H13B H 0.3486 0.7666 0.7138 0.106 Uiso 1 1 calc R . . 
C14 C 0.3504(9) 0.7411(4) 0.7888(4) 0.085(3) Uani 1 1 d . . . 
H14A H 0.3651 0.7615 0.8225 0.102 Uiso 1 1 calc R . . 
H14B H 0.4305 0.7105 0.7870 0.102 Uiso 1 1 calc R . . 
C15 C 0.1971(10) 0.7081(5) 0.7829(4) 0.106(3) Uani 1 1 d . . . 
H15A H 0.1175 0.7393 0.7819 0.127 Uiso 1 1 calc R . . 
H15B H 0.1861 0.6857 0.7501 0.127 Uiso 1 1 calc R . . 
C16 C 0.1787(14) 0.6640(6) 0.8252(6) 0.157(5) Uani 1 1 d . . . 
H16A H 0.0806 0.6449 0.8199 0.236 Uiso 1 1 calc R . . 
H16B H 0.1881 0.6860 0.8578 0.236 Uiso 1 1 calc R . . 
H16C H 0.2553 0.6322 0.8257 0.236 Uiso 1 1 calc R . . 
C17 C 0.5046(9) 0.8694(5) 0.7989(3) 0.090(3) Uani 1 1 d . . . 
H17A H 0.4095 0.8919 0.7978 0.108 Uiso 1 1 calc R . . 
H17B H 0.5099 0.8419 0.8289 0.108 Uiso 1 1 calc R . . 
C18 C 0.6299(11) 0.9161(5) 0.8075(5) 0.120(4) Uani 1 1 d . . . 
H18A H 0.6307 0.9432 0.7773 0.143 Uiso 1 1 calc R . . 
H18B H 0.7265 0.8947 0.8127 0.143 Uiso 1 1 calc R . . 
C19 C 0.6028(18) 0.9563(7) 0.8576(5) 0.165(6) Uani 1 1 d D . . 
H19A H 0.5023 0.9746 0.8532 0.198 Uiso 1 1 calc R . . 
H19B H 0.6086 0.9292 0.8879 0.198 Uiso 1 1 calc R . . 
C20 C 0.709(3) 1.0033(8) 0.8656(8) 0.319(16) Uani 1 1 d D . . 
H20A H 0.6907 1.0266 0.8962 0.478 Uiso 1 1 calc R . . 
H20B H 0.7012 1.0308 0.8360 0.478 Uiso 1 1 calc R . . 
H20C H 0.8081 0.9852 0.8702 0.478 Uiso 1 1 calc R . . 
 
loop_ 
 _atom_site_aniso_label 
 _atom_site_aniso_U_11 
 _atom_site_aniso_U_22 
 _atom_site_aniso_U_33 
 _atom_site_aniso_U_23 
 _atom_site_aniso_U_13 
 _atom_site_aniso_U_12 
I001 0.0525(3) 0.0579(3) 0.0569(3) 0.0051(2) -0.0024(2) 0.0104(2) 
I002 0.0958(4) 0.0667(3) 0.0690(4) -0.0046(3) -0.0219(3) -0.0109(3) 
I003 0.1231(6) 0.0534(3) 0.1421(7) -0.0225(4) 0.0064(5) 0.0188(3) 
F1 0.087(3) 0.046(2) 0.086(3) -0.003(2) -0.006(2) 0.016(2) 
F2 0.072(3) 0.060(2) 0.067(3) 0.011(2) -0.015(2) 0.010(2) 
F3 0.093(3) 0.063(3) 0.067(3) -0.011(2) -0.018(2) 0.006(2) 
C1 0.053(4) 0.053(4) 0.059(5) 0.007(3) 0.004(3) 0.007(3) 
C2 0.054(4) 0.048(4) 0.062(5) 0.002(3) 0.007(4) 0.006(3) 
C3 0.043(4) 0.051(4) 0.055(4) 0.010(3) 0.006(3) 0.002(3) 
C4 0.059(4) 0.039(4) 0.059(4) 0.005(3) 0.005(3) 0.002(3) 
C5 0.058(4) 0.048(4) 0.044(4) 0.001(3) 0.007(3) 0.002(3) 
C6 0.043(4) 0.050(4) 0.050(4) 0.014(3) 0.005(3) 0.000(3) 
C7 0.055(4) 0.039(3) 0.048(4) 0.004(3) 0.006(3) 0.002(3) 
C8 0.052(4) 0.049(4) 0.051(4) -0.001(3) 0.004(3) -0.002(3) 
C9 0.085(5) 0.058(5) 0.059(5) 0.000(4) -0.010(4) -0.006(4) 
C10 0.068(5) 0.049(4) 0.061(5) 0.002(4) -0.007(4) 0.003(3) 
C11 0.080(5) 0.047(4) 0.078(6) -0.002(4) 0.003(4) 0.007(4) 
C12 0.058(4) 0.050(4) 0.062(4) 0.003(4) 0.002(3) -0.001(3) 
Br1 0.0783(7) 0.0654(7) 0.0496(6) 0.000 -0.0154(5) 0.000 
N1 0.052(5) 0.106(7) 0.060(6) 0.000 0.014(4) 0.000 
C13 0.055(5) 0.122(8) 0.089(7) -0.009(6) 0.012(4) -0.005(5) 
C14 0.062(5) 0.101(7) 0.096(7) -0.002(6) 0.030(5) -0.002(5) 
C15 0.081(7) 0.109(8) 0.131(9) -0.024(7) 0.030(6) -0.019(6) 
C16 0.120(10) 0.163(12) 0.196(14) 0.033(11) 0.050(9) -0.029(9) 
C17 0.068(6) 0.118(8) 0.087(7) -0.001(6) 0.021(5) -0.006(5) 
C18 0.088(7) 0.126(9) 0.145(10) -0.013(8) 0.011(7) -0.027(6) 
C19 0.246(16) 0.126(11) 0.115(10) -0.011(9) -0.024(10) -0.094(11) 
C20 0.61(5) 0.150(17) 0.22(2) -0.008(16) 0.13(3) 0.02(2) 
 
_geom_special_details 
; 
 All esds (except the esd in the dihedral angle between two l.s. planes) 
 are estimated using the full covariance matrix.  The cell esds are taken 
 into account individually in the estimation of esds in distances, angles 
 and torsion angles; correlations between esds in cell parameters are only 
 used when they are defined by crystal symmetry.  An approximate (isotropic) 
 treatment of cell esds is used for estimating esds involving l.s. planes. 
; 
 
loop_ 
 _geom_bond_atom_site_label_1 
 _geom_bond_atom_site_label_2 
 _geom_bond_distance 
 _geom_bond_site_symmetry_2 
 _geom_bond_publ_flag 
I001 C1 2.017(7) . ? 
I002 C9 2.019(8) . ? 
I003 C11 1.975(7) . ? 
F1 C4 1.335(7) . ? 
F2 C6 1.349(7) . ? 
F3 C8 1.344(7) . ? 
C1 C2 1.184(9) . ? 
C2 C3 1.445(9) . ? 
C3 C4 1.386(9) . ? 
C3 C8 1.389(9) . ? 
C4 C5 1.397(9) . ? 
C5 C6 1.380(9) . ? 
C5 C10 1.431(9) . ? 
C6 C7 1.395(9) . ? 
C7 C8 1.386(9) . ? 
C7 C12 1.439(9) . ? 
C9 C10 1.172(9) . ? 
C11 C12 1.186(9) . ? 
N1 C13 1.517(10) 2_656 ? 
N1 C13 1.517(10) . ? 
N1 C17 1.534(10) . ? 
N1 C17 1.534(10) 2_656 ? 
C13 C14 1.482(11) . ? 
C13 H13A 0.9700 . ? 
C13 H13B 0.9700 . ? 
C14 C15 1.528(11) . ? 
C14 H14A 0.9700 . ? 
C14 H14B 0.9700 . ? 
C15 C16 1.463(14) . ? 
C15 H15A 0.9700 . ? 
C15 H15B 0.9700 . ? 
C16 H16A 0.9600 . ? 
C16 H16B 0.9600 . ? 
C16 H16C 0.9600 . ? 
C17 C18 1.494(12) . ? 
C17 H17A 0.9700 . ? 
C17 H17B 0.9700 . ? 
C18 C19 1.592(16) . ? 
C18 H18A 0.9700 . ? 
C18 H18B 0.9700 . ? 
C19 C20 1.377(16) . ? 
C19 H19A 0.9700 . ? 
C19 H19B 0.9700 . ? 
C20 H20A 0.9600 . ? 
C20 H20B 0.9600 . ? 
C20 H20C 0.9600 . ? 
 
loop_ 
 _geom_angle_atom_site_label_1 
 _geom_angle_atom_site_label_2 
 _geom_angle_atom_site_label_3 
 _geom_angle 
 _geom_angle_site_symmetry_1 
 _geom_angle_site_symmetry_3 
 _geom_angle_publ_flag 
C2 C1 I001 172.8(6) . . ? 
C1 C2 C3 178.7(8) . . ? 
C4 C3 C8 116.2(6) . . ? 
C4 C3 C2 122.5(6) . . ? 
C8 C3 C2 121.2(6) . . ? 
F1 C4 C3 117.9(6) . . ? 
F1 C4 C5 117.9(6) . . ? 
C3 C4 C5 124.2(6) . . ? 
C6 C5 C4 115.2(6) . . ? 
C6 C5 C10 123.9(6) . . ? 
C4 C5 C10 120.8(6) . . ? 
F2 C6 C5 117.6(6) . . ? 
F2 C6 C7 117.6(6) . . ? 
C5 C6 C7 124.8(6) . . ? 
C8 C7 C6 115.7(6) . . ? 
C8 C7 C12 121.2(6) . . ? 
C6 C7 C12 123.1(6) . . ? 
F3 C8 C7 118.1(6) . . ? 
F3 C8 C3 118.2(6) . . ? 
C7 C8 C3 123.8(6) . . ? 
C10 C9 I002 175.3(7) . . ? 
C9 C10 C5 173.6(8) . . ? 
C12 C11 I003 177.6(7) . . ? 
C11 C12 C7 176.6(8) . . ? 
C13 N1 C13 111.6(10) 2_656 . ? 
C13 N1 C17 108.9(5) 2_656 . ? 
C13 N1 C17 108.6(5) . . ? 
C13 N1 C17 108.6(5) 2_656 2_656 ? 
C13 N1 C17 108.9(5) . 2_656 ? 
C17 N1 C17 110.2(10) . 2_656 ? 
C14 C13 N1 116.2(7) . . ? 
C14 C13 H13A 108.2 . . ? 
N1 C13 H13A 108.2 . . ? 
C14 C13 H13B 108.2 . . ? 
N1 C13 H13B 108.2 . . ? 
H13A C13 H13B 107.4 . . ? 
C13 C14 C15 110.2(8) . . ? 
C13 C14 H14A 109.6 . . ? 
C15 C14 H14A 109.6 . . ? 
C13 C14 H14B 109.6 . . ? 
C15 C14 H14B 109.6 . . ? 
H14A C14 H14B 108.1 . . ? 
C16 C15 C14 112.7(10) . . ? 
C16 C15 H15A 109.0 . . ? 
C14 C15 H15A 109.0 . . ? 
C16 C15 H15B 109.0 . . ? 
C14 C15 H15B 109.0 . . ? 
H15A C15 H15B 107.8 . . ? 
C15 C16 H16A 109.5 . . ? 
C15 C16 H16B 109.5 . . ? 
H16A C16 H16B 109.5 . . ? 
C15 C16 H16C 109.5 . . ? 
H16A C16 H16C 109.5 . . ? 
H16B C16 H16C 109.5 . . ? 
C18 C17 N1 117.6(7) . . ? 
C18 C17 H17A 107.9 . . ? 
N1 C17 H17A 107.9 . . ? 
C18 C17 H17B 107.9 . . ? 
N1 C17 H17B 107.9 . . ? 
H17A C17 H17B 107.2 . . ? 
C17 C18 C19 108.1(9) . . ? 
C17 C18 H18A 110.1 . . ? 
C19 C18 H18A 110.1 . . ? 
C17 C18 H18B 110.1 . . ? 
C19 C18 H18B 110.1 . . ? 
H18A C18 H18B 108.4 . . ? 
C20 C19 C18 111.0(15) . . ? 
C20 C19 H19A 109.5 . . ? 
C18 C19 H19A 109.4 . . ? 
C20 C19 H19B 109.4 . . ? 
C18 C19 H19B 109.4 . . ? 
H19A C19 H19B 108.0 . . ? 
C19 C20 H20A 109.4 . . ? 
C19 C20 H20B 109.5 . . ? 
H20A C20 H20B 109.5 . . ? 
C19 C20 H20C 109.5 . . ? 
H20A C20 H20C 109.5 . . ? 
H20B C20 H20C 109.5 . . ? 
 
loop_ 
 _geom_torsion_atom_site_label_1 
 _geom_torsion_atom_site_label_2 
 _geom_torsion_atom_site_label_3 
 _geom_torsion_atom_site_label_4 
 _geom_torsion 
 _geom_torsion_site_symmetry_1 
 _geom_torsion_site_symmetry_2 
 _geom_torsion_site_symmetry_3 
 _geom_torsion_site_symmetry_4 
 _geom_torsion_publ_flag 
I001 C1 C2 C3 -44(39) . . . . ? 
C1 C2 C3 C4 139(36) . . . . ? 
C1 C2 C3 C8 -39(36) . . . . ? 
C8 C3 C4 F1 179.8(6) . . . . ? 
C2 C3 C4 F1 2.2(10) . . . . ? 
C8 C3 C4 C5 0.6(10) . . . . ? 
C2 C3 C4 C5 -177.0(6) . . . . ? 
F1 C4 C5 C6 -179.5(6) . . . . ? 
C3 C4 C5 C6 -0.3(10) . . . . ? 
F1 C4 C5 C10 -3.8(10) . . . . ? 
C3 C4 C5 C10 175.5(7) . . . . ? 
C4 C5 C6 F2 179.3(6) . . . . ? 
C10 C5 C6 F2 3.7(10) . . . . ? 
C4 C5 C6 C7 -0.1(10) . . . . ? 
C10 C5 C6 C7 -175.7(6) . . . . ? 
F2 C6 C7 C8 -179.2(6) . . . . ? 
C5 C6 C7 C8 0.2(10) . . . . ? 
F2 C6 C7 C12 -1.5(9) . . . . ? 
C5 C6 C7 C12 177.9(6) . . . . ? 
C6 C7 C8 F3 179.3(6) . . . . ? 
C12 C7 C8 F3 1.5(10) . . . . ? 
C6 C7 C8 C3 0.2(10) . . . . ? 
C12 C7 C8 C3 -177.6(6) . . . . ? 
C4 C3 C8 F3 -179.6(6) . . . . ? 
C2 C3 C8 F3 -2.0(10) . . . . ? 
C4 C3 C8 C7 -0.6(10) . . . . ? 
C2 C3 C8 C7 177.1(6) . . . . ? 
I002 C9 C10 C5 -7(16) . . . . ? 
C6 C5 C10 C9 146(7) . . . . ? 
C4 C5 C10 C9 -30(8) . . . . ? 
I003 C11 C12 C7 24(29) . . . . ? 
C8 C7 C12 C11 13(14) . . . . ? 
C6 C7 C12 C11 -164(13) . . . . ? 
C13 N1 C13 C14 54.5(6) 2_656 . . . ? 
C17 N1 C13 C14 -65.6(10) . . . . ? 
C17 N1 C13 C14 174.4(7) 2_656 . . . ? 
N1 C13 C14 C15 175.8(7) . . . . ? 
C13 C14 C15 C16 -176.0(9) . . . . ? 
C13 N1 C17 C18 62.6(11) 2_656 . . . ? 
C13 N1 C17 C18 -175.7(9) . . . . ? 
C17 N1 C17 C18 -56.4(8) 2_656 . . . ? 
N1 C17 C18 C19 175.5(9) . . . . ? 
C17 C18 C19 C20 -175.7(15) . . . . ? 
 
_diffrn_measured_fraction_theta_max    0.987 
_diffrn_reflns_theta_full              27.50 
_diffrn_measured_fraction_theta_full   0.987 
_refine_diff_density_max    1.283 
_refine_diff_density_min   -1.311 
_refine_diff_density_rms    0.119 

#===END


data_1-1-Ph3SBr
 
_audit_creation_method            SHELXL-97 
_chemical_name_systematic 
; 
 ? 
; 
_chemical_name_common             ? 
_chemical_melting_point           ? 
_chemical_formula_moiety          
'	C18 H15 S, 2(C12 F3 I3), Br '
_chemical_formula_sum 
 '	C42 H15 Br F6 I6 S' 
_chemical_formula_weight          	1506.91
 
 
loop_ 
 _atom_type_symbol 
 _atom_type_description 
 _atom_type_scat_dispersion_real 
 _atom_type_scat_dispersion_imag 
 _atom_type_scat_source 
 'C'  'C'   0.0033   0.0016 
 'International Tables Vol C Tables 4.2.6.8 and 6.1.1.4' 
 'H'  'H'   0.0000   0.0000 
 'International Tables Vol C Tables 4.2.6.8 and 6.1.1.4' 
 'F'  'F'   0.0171   0.0103 
 'International Tables Vol C Tables 4.2.6.8 and 6.1.1.4' 
 'S'  'S'   0.1246   0.1234 
 'International Tables Vol C Tables 4.2.6.8 and 6.1.1.4' 
 'Br'  'Br'  -0.2901   2.4595 
 'International Tables Vol C Tables 4.2.6.8 and 6.1.1.4' 
 'I'  'I'  -0.4742   1.8119 
 'International Tables Vol C Tables 4.2.6.8 and 6.1.1.4' 
 
_symmetry_cell_setting            monoclinic
_symmetry_space_group_name_H-M    C2/c 
_symmetry_space_group_name_Hall   '-c 2yc'
 
loop_ 
 _symmetry_equiv_pos_as_xyz 
 'x, y, z' 
 '-x, y, -z+1/2' 
 'x+1/2, y+1/2, z' 
 '-x+1/2, y+1/2, -z+1/2' 
 '-x, -y, -z' 
 'x, -y, z-1/2' 
 '-x+1/2, -y+1/2, -z' 
 'x+1/2, -y+1/2, z-1/2' 
 
_cell_length_a                    11.7331(6) 
_cell_length_b                    15.2250(10) 
_cell_length_c                    25.0661(16) 
_cell_angle_alpha                 90.00 
_cell_angle_beta                  97.115(2) 
_cell_angle_gamma                 90.00 
_cell_volume                      4443.2(5) 
_cell_formula_units_Z             4
_cell_measurement_temperature     150(2) 
_cell_measurement_reflns_used            9954
_cell_measurement_theta_min              2.68
_cell_measurement_theta_max             27.43

 
_exptl_crystal_description        prism 
_exptl_crystal_colour             colorless 
_exptl_crystal_size_max           0.37 
_exptl_crystal_size_mid           0.23 
_exptl_crystal_size_min           0.15 
_exptl_crystal_density_meas       ? 
_exptl_crystal_density_diffrn     2.253 
_exptl_crystal_density_method     'not measured' 
_exptl_crystal_F_000              2760 
_exptl_absorpt_coefficient_mu     5.196 
_exptl_absorpt_correction_type                              multi-scan
_exptl_absorpt_process_details
;
  [Sheldrick, G.M. (2002). SADABS Bruker AXS Inc., Madison, Wisconsin, USA]
;
_exptl_absorpt_correction_T_min                      0.248
_exptl_absorpt_correction_T_max                      0.459

#----------------------------- Remark ------------------------------------#
# SADABS output:                                                          #
# Estimated minimum and maximum transmission:  0.5623  0.7456             #
# The ratio of these values is more reliable than their absolute values!  #
#-------------------------------------------------------------------------#


 
_diffrn_measurement_device_type         'APEXII, Bruker-AXS'
_diffrn_measurement_method              'CCD rotation images, thin slices'
_diffrn_detector                        'CCD plate'
_diffrn_ambient_temperature             150(2)
_diffrn_radiation_wavelength            0.71073
_diffrn_radiation_type                  MoK\a
_diffrn_radiation_monochromator         graphite
_diffrn_radiation_probe                 x-ray
_diffrn_standards_number          ? 
_diffrn_standards_interval_count  ? 
_diffrn_standards_interval_time   ? 
_diffrn_standards_decay_%         ? 
_diffrn_reflns_number             32630 
_diffrn_reflns_av_R_equivalents   0.0409 
_diffrn_reflns_av_sigmaI/netI     0.0254 
_diffrn_reflns_limit_h_min        -15 
_diffrn_reflns_limit_h_max        14 
_diffrn_reflns_limit_k_min        -19 
_diffrn_reflns_limit_k_max        19 
_diffrn_reflns_limit_l_min        -32 
_diffrn_reflns_limit_l_max        32 
_diffrn_reflns_theta_min          1.64 
_diffrn_reflns_theta_max          27.47 
_reflns_number_total              5054 
_reflns_number_gt                 4505 
_reflns_threshold_expression      >2sigma(I) 
 
_computing_data_collection              'Bruker SAINT (Bruker, 2002)'
_computing_cell_refinement              'Bruker SMART (Bruker, 2002)'
_computing_data_reduction               'Bruker SAINT (Bruker, 2002)'
_computing_structure_solution           'SIR97 (ALtomare et al., 1999))'
_computing_structure_refinement         'SHELXL-97 (Sheldrick, 1997)'
_computing_molecular_graphics           'Ortep-3 for Windows (Farrugia, 1997)'
_computing_publication_material  'WinGX publication routines (Farrugia, 1999)'
 
_refine_special_details 
; 
 Refinement of F^2^ against ALL reflections.  The weighted R-factor wR and 
 goodness of fit S are based on F^2^, conventional R-factors R are based 
 on F, with F set to zero for negative F^2^. The threshold expression of 
 F^2^ > 2sigma(F^2^) is used only for calculating R-factors(gt) etc. and is 
 not relevant to the choice of reflections for refinement.  R-factors based 
 on F^2^ are statistically about twice as large as those based on F, and R- 
 factors based on ALL data will be even larger. 
; 
 
_refine_ls_structure_factor_coef  Fsqd  
_refine_ls_matrix_type            full 
_refine_ls_weighting_scheme       calc  
_refine_ls_weighting_details 
 'calc w=1/[\s^2^(Fo^2^)+(0.0166P)^2^+11.4009P] where P=(Fo^2^+2Fc^2^)/3' 
_atom_sites_solution_primary      direct 
_atom_sites_solution_secondary    difmap 
_atom_sites_solution_hydrogens    geom 
_refine_ls_hydrogen_treatment     constr 
_refine_ls_extinction_method      none 
_refine_ls_extinction_coef        ? 
_refine_ls_number_reflns          5054 
_refine_ls_number_parameters      267 
_refine_ls_number_restraints      0 
_refine_ls_R_factor_all           0.0279 
_refine_ls_R_factor_gt            0.0228 
_refine_ls_wR_factor_ref          0.0532 
_refine_ls_wR_factor_gt           0.0508 
_refine_ls_goodness_of_fit_ref    1.084 
_refine_ls_restrained_S_all       1.084 
_refine_ls_shift/su_max           0.001 
_refine_ls_shift/su_mean          0.000 
 
loop_ 
 _atom_site_label 
 _atom_site_type_symbol 
 _atom_site_fract_x 
 _atom_site_fract_y 
 _atom_site_fract_z 
 _atom_site_U_iso_or_equiv 
 _atom_site_adp_type 
 _atom_site_occupancy 
 _atom_site_symmetry_multiplicity 
 _atom_site_calc_flag 
 _atom_site_refinement_flags 
 _atom_site_disorder_assembly 
 _atom_site_disorder_group 
C1 C 0.1357(2) 0.43786(18) 0.06715(11) 0.0233(6) Uani 1 1 d . . . 
C2 C 0.1977(2) 0.40320(19) 0.02782(12) 0.0246(6) Uani 1 1 d . . . 
C3 C 0.1474(2) 0.36122(18) -0.01835(11) 0.0242(6) Uani 1 1 d . . . 
C4 C 0.0278(2) 0.35342(19) -0.02426(11) 0.0248(6) Uani 1 1 d . . . 
C5 C -0.0405(2) 0.38435(18) 0.01342(11) 0.0239(6) Uani 1 1 d . . . 
C6 C 0.0178(2) 0.42606(18) 0.05853(11) 0.0240(6) Uani 1 1 d . . . 
C7 C 0.1914(2) 0.4884(2) 0.11120(12) 0.0291(6) Uani 1 1 d . . . 
C8 C 0.2386(3) 0.5361(2) 0.14417(13) 0.0324(7) Uani 1 1 d . . . 
C9 C 0.2151(3) 0.3299(2) -0.05835(12) 0.0278(6) Uani 1 1 d . . . 
C10 C 0.2711(3) 0.3055(2) -0.09195(12) 0.0302(7) Uani 1 1 d . . . 
C11 C -0.1630(3) 0.37653(19) 0.00562(12) 0.0268(6) Uani 1 1 d . . . 
C12 C -0.2651(2) 0.37273(19) -0.00212(12) 0.0279(6) Uani 1 1 d . . . 
F1 F 0.31200(13) 0.41292(12) 0.03453(7) 0.0329(4) Uani 1 1 d . . . 
F2 F -0.02371(15) 0.31518(12) -0.06882(7) 0.0333(4) Uani 1 1 d . . . 
F3 F -0.04541(14) 0.45831(12) 0.09507(7) 0.0335(4) Uani 1 1 d . . . 
S1A S 0.07356(12) 0.18078(10) 0.78250(6) 0.0280(3) Uani 0.50 1 d P . . 
Br1 Br 0.5000 0.78149(3) 0.2500 0.02627(9) Uani 1 2 d S . . 
I1 I 0.327132(18) 0.625619(15) 0.192103(9) 0.03878(7) Uani 1 1 d . . . 
I2 I 0.362300(16) 0.268904(13) -0.151920(8) 0.02796(6) Uani 1 1 d . . . 
I3 I -0.435591(16) 0.367120(14) -0.016880(10) 0.03737(7) Uani 1 1 d . . . 
C1A C -0.0443(3) 0.1314(3) 0.8062(2) 0.0279(9) Uani 0.50 1 d PG A 1 
C2A C -0.0172(3) 0.0722(3) 0.8481(2) 0.0400(13) Uani 0.50 1 d PG A 1 
H2A H 0.0591 0.0627 0.8618 0.048 Uiso 0.50 1 calc PR A 1 
C3A C -0.1042(4) 0.0273(3) 0.86948(19) 0.0407(15) Uani 0.50 1 d PG A 1 
H3A H -0.0861 -0.0123 0.8975 0.049 Uiso 0.50 1 calc PR A 1 
C4A C -0.2182(4) 0.0415(4) 0.8490(2) 0.0479(16) Uani 0.50 1 d PG A 1 
H4A H -0.2764 0.0114 0.8633 0.058 Uiso 0.50 1 calc PR A 1 
C5A C -0.2453(3) 0.1007(4) 0.8071(3) 0.064(2) Uani 0.50 1 d PG A 1 
H5A H -0.3216 0.1102 0.7933 0.077 Uiso 0.50 1 calc PR A 1 
C6A C -0.1583(4) 0.1456(3) 0.7857(2) 0.0456(15) Uani 0.50 1 d PG . 1 
H6A H -0.1764 0.1851 0.7577 0.055 Uiso 0.50 1 calc PR A 1 
C1B C -0.0972(4) 0.1240(3) 0.77629(15) 0.0279(9) Uani 0.50 1 d PG . 2 
C2B C -0.0111(3) 0.0819(3) 0.80993(19) 0.0400(13) Uani 0.50 1 d PG A 2 
H2B H 0.0634 0.0802 0.8009 0.048 Uiso 0.50 1 calc PR . 2 
C3B C -0.0363(4) 0.0424(4) 0.85707(18) 0.0407(15) Uani 0.50 1 d PG A 2 
H3B H 0.0214 0.0143 0.8796 0.049 Uiso 0.50 1 calc PR . 2 
C4B C -0.1476(5) 0.0450(4) 0.8706(2) 0.0479(16) Uani 0.50 1 d PG A 2 
H4B H -0.1645 0.0185 0.9021 0.058 Uiso 0.50 1 calc PR . 2 
C5B C -0.2338(3) 0.0871(4) 0.8369(3) 0.064(2) Uani 0.50 1 d PG A 2 
H5B H -0.3083 0.0888 0.8460 0.077 Uiso 0.50 1 calc PR . 2 
C6B C -0.2086(4) 0.1266(4) 0.7898(2) 0.0456(15) Uani 0.50 1 d PG A 2 
H6B H -0.2662 0.1547 0.7673 0.055 Uiso 0.50 1 calc PR . 2 
C1C C -0.0265(4) 0.2863(3) 0.73995(16) 0.0263(14) Uani 0.50 1 d PG A 3 
C2C C 0.0049(5) 0.3069(3) 0.79379(15) 0.0369(18) Uani 0.50 1 d PG A 3 
H2C H 0.0078 0.2630 0.8198 0.044 Uiso 0.50 1 calc PR A 3 
C3C C 0.0321(6) 0.3930(3) 0.80881(18) 0.044(2) Uani 0.50 1 d PG A 3 
H3C H 0.0531 0.4067 0.8448 0.053 Uiso 0.50 1 calc PR A 3 
C4C C 0.0278(8) 0.4585(3) 0.7700(2) 0.040(2) Uani 0.50 1 d PG A 3 
H4C H 0.0460 0.5161 0.7801 0.049 Uiso 0.50 1 calc PR A 3 
C5C C -0.0036(8) 0.4379(3) 0.7162(2) 0.036(2) Uani 0.50 1 d PG A 3 
H5C H -0.0064 0.4817 0.6902 0.043 Uiso 0.50 1 calc PR A 3 
C6C C -0.0307(5) 0.3518(3) 0.70113(15) 0.034(2) Uani 0.50 1 d PG A 3 
H6C H -0.0518 0.3380 0.6651 0.040 Uiso 0.50 1 calc PR A 3 
 
loop_ 
 _atom_site_aniso_label 
 _atom_site_aniso_U_11 
 _atom_site_aniso_U_22 
 _atom_site_aniso_U_33 
 _atom_site_aniso_U_23 
 _atom_site_aniso_U_13 
 _atom_site_aniso_U_12 
C1 0.0225(13) 0.0234(14) 0.0241(14) 0.0029(11) 0.0031(11) -0.0052(11) 
C2 0.0201(13) 0.0239(14) 0.0299(15) 0.0054(12) 0.0036(11) -0.0044(11) 
C3 0.0269(14) 0.0224(14) 0.0241(14) 0.0050(11) 0.0060(11) -0.0009(11) 
C4 0.0277(14) 0.0250(14) 0.0209(14) 0.0029(12) 0.0006(11) -0.0038(11) 
C5 0.0229(13) 0.0240(14) 0.0251(15) 0.0051(11) 0.0036(11) -0.0041(11) 
C6 0.0246(14) 0.0233(14) 0.0250(14) 0.0032(12) 0.0067(11) -0.0009(11) 
C7 0.0234(14) 0.0331(16) 0.0313(16) -0.0003(13) 0.0056(12) -0.0037(12) 
C8 0.0261(15) 0.0362(17) 0.0354(17) -0.0061(14) 0.0057(13) -0.0066(13) 
C9 0.0292(15) 0.0286(16) 0.0258(15) 0.0037(12) 0.0044(12) -0.0022(12) 
C10 0.0317(15) 0.0314(16) 0.0276(16) 0.0034(13) 0.0035(13) 0.0016(13) 
C11 0.0283(15) 0.0244(15) 0.0275(16) 0.0008(12) 0.0030(12) -0.0044(11) 
C12 0.0223(14) 0.0292(16) 0.0319(16) 0.0031(13) 0.0023(12) -0.0048(11) 
F1 0.0175(8) 0.0415(10) 0.0400(10) -0.0041(8) 0.0044(7) -0.0039(7) 
F2 0.0334(9) 0.0415(10) 0.0238(9) -0.0023(8) -0.0009(7) -0.0072(8) 
F3 0.0268(9) 0.0411(10) 0.0343(10) -0.0095(8) 0.0106(7) -0.0044(7) 
S1A 0.0196(6) 0.0359(8) 0.0283(8) -0.0010(6) 0.0020(6) -0.0032(6) 
Br1 0.02151(18) 0.0278(2) 0.0300(2) 0.000 0.00519(15) 0.000 
I1 0.03003(11) 0.04329(13) 0.04243(13) -0.01749(10) 0.00216(9) -0.00769(9) 
I2 0.02961(10) 0.03133(11) 0.02366(10) 0.00024(8) 0.00622(7) 0.00072(8) 
I3 0.02118(10) 0.03317(12) 0.05558(15) 0.00790(10) -0.00397(9) -0.00414(8) 
C1A 0.025(3) 0.028(2) 0.032(3) 0.005(2) 0.0082(17) 0.0013(19) 
C2A 0.041(3) 0.042(3) 0.039(3) 0.015(3) 0.012(3) 0.010(2) 
C3A 0.047(4) 0.044(3) 0.033(3) 0.012(2) 0.012(3) 0.018(3) 
C4A 0.048(4) 0.042(3) 0.059(4) 0.019(3) 0.029(3) 0.001(3) 
C5A 0.035(3) 0.067(4) 0.096(8) 0.048(5) 0.031(4) 0.002(3) 
C6A 0.019(3) 0.067(4) 0.053(3) 0.032(3) 0.012(3) 0.007(3) 
C1B 0.025(3) 0.028(2) 0.032(3) 0.005(2) 0.0082(17) 0.0013(19) 
C2B 0.041(3) 0.042(3) 0.039(3) 0.015(3) 0.012(3) 0.010(2) 
C3B 0.047(4) 0.044(3) 0.033(3) 0.012(2) 0.012(3) 0.018(3) 
C4B 0.048(4) 0.042(3) 0.059(4) 0.019(3) 0.029(3) 0.001(3) 
C5B 0.035(3) 0.067(4) 0.096(8) 0.048(5) 0.031(4) 0.002(3) 
C6B 0.019(3) 0.067(4) 0.053(3) 0.032(3) 0.012(3) 0.007(3) 
C1C 0.025(4) 0.031(3) 0.024(4) 0.003(3) 0.004(3) 0.007(2) 
C2C 0.051(5) 0.031(4) 0.029(4) 0.002(4) 0.006(3) 0.005(3) 
C3C 0.066(5) 0.034(5) 0.031(5) -0.005(4) 0.004(4) 0.001(4) 
C4C 0.061(7) 0.029(4) 0.034(5) 0.004(3) 0.013(4) 0.007(4) 
C5C 0.046(5) 0.034(5) 0.028(5) 0.007(4) 0.005(4) 0.004(4) 
C6C 0.033(4) 0.047(6) 0.019(3) 0.007(4) -0.003(3) 0.006(4) 
 
_geom_special_details 
; 
 All esds (except the esd in the dihedral angle between two l.s. planes) 
 are estimated using the full covariance matrix.  The cell esds are taken 
 into account individually in the estimation of esds in distances, angles 
 and torsion angles; correlations between esds in cell parameters are only 
 used when they are defined by crystal symmetry.  An approximate (isotropic) 
 treatment of cell esds is used for estimating esds involving l.s. planes. 
; 
 
loop_ 
 _geom_bond_atom_site_label_1 
 _geom_bond_atom_site_label_2 
 _geom_bond_distance 
 _geom_bond_site_symmetry_2 
 _geom_bond_publ_flag 
C1 C6 1.385(4) . ? 
C1 C2 1.399(4) . ? 
C1 C7 1.435(4) . ? 
C2 F1 1.340(3) . ? 
C2 C3 1.388(4) . ? 
C3 C4 1.398(4) . ? 
C3 C9 1.436(4) . ? 
C4 F2 1.336(3) . ? 
C4 C5 1.394(4) . ? 
C5 C6 1.400(4) . ? 
C5 C11 1.431(4) . ? 
C6 F3 1.341(3) . ? 
C7 C8 1.185(4) . ? 
C8 I1 2.017(3) . ? 
C9 C10 1.190(4) . ? 
C10 I2 2.028(3) . ? 
C11 C12 1.191(4) . ? 
C12 I3 1.990(3) . ? 
S1A C1A 1.742(3) . ? 
S1A C1B 1.760(3) 2_556 ? 
S1A C1C 1.768(4) 2_556 ? 
S1A C2B 1.973(5) . ? 
S1A C6A 2.149(5) 2_556 ? 
S1A C1B 2.170(5) . ? 
S1A C1C 2.187(4) . ? 
S1A S1A 2.222(3) 2_556 ? 
C1A C2A 1.3900 . ? 
C1A C6A 1.3900 . ? 
C2A C3A 1.3900 . ? 
C2A H2A 0.9300 . ? 
C3A C4A 1.3900 . ? 
C3A H3A 0.9300 . ? 
C4A C5A 1.3900 . ? 
C4A H4A 0.9300 . ? 
C5A C6A 1.3900 . ? 
C5A H5A 0.9300 . ? 
C6A S1A 2.149(5) 2_556 ? 
C6A H6A 0.9300 . ? 
C1B C2B 1.3900 . ? 
C1B C6B 1.3900 . ? 
C1B S1A 1.760(3) 2_556 ? 
C2B C3B 1.3900 . ? 
C2B H2B 0.9300 . ? 
C3B C4B 1.3900 . ? 
C3B H3B 0.9300 . ? 
C4B C5B 1.3900 . ? 
C4B H4B 0.9300 . ? 
C5B C6B 1.3900 . ? 
C5B H5B 0.9300 . ? 
C6B H6B 0.9300 . ? 
C1C C2C 1.3900 . ? 
C1C C6C 1.3900 . ? 
C2C C3C 1.3900 . ? 
C2C H2C 0.9300 . ? 
C3C C4C 1.3900 . ? 
C3C H3C 0.9300 . ? 
C4C C5C 1.3900 . ? 
C4C H4C 0.9300 . ? 
C5C C6C 1.3900 . ? 
C5C H5C 0.9300 . ? 
C6C H6C 0.9300 . ? 
 
loop_ 
 _geom_angle_atom_site_label_1 
 _geom_angle_atom_site_label_2 
 _geom_angle_atom_site_label_3 
 _geom_angle 
 _geom_angle_site_symmetry_1 
 _geom_angle_site_symmetry_3 
 _geom_angle_publ_flag 
C6 C1 C2 115.9(3) . . ? 
C6 C1 C7 122.7(3) . . ? 
C2 C1 C7 121.2(3) . . ? 
F1 C2 C3 118.1(3) . . ? 
F1 C2 C1 118.0(3) . . ? 
C3 C2 C1 123.8(3) . . ? 
C2 C3 C4 116.4(3) . . ? 
C2 C3 C9 121.4(3) . . ? 
C4 C3 C9 122.2(3) . . ? 
F2 C4 C5 118.4(2) . . ? 
F2 C4 C3 118.0(3) . . ? 
C5 C4 C3 123.6(3) . . ? 
C4 C5 C6 115.8(2) . . ? 
C4 C5 C11 122.1(3) . . ? 
C6 C5 C11 122.0(3) . . ? 
F3 C6 C1 118.2(3) . . ? 
F3 C6 C5 117.5(2) . . ? 
C1 C6 C5 124.3(3) . . ? 
C8 C7 C1 173.8(3) . . ? 
C7 C8 I1 172.4(3) . . ? 
C10 C9 C3 178.8(3) . . ? 
C9 C10 I2 176.9(3) . . ? 
C12 C11 C5 177.5(3) . . ? 
C11 C12 I3 178.6(3) . . ? 
C1A S1A C1B 106.7(2) . 2_556 ? 
C1A S1A C1C 105.7(2) . 2_556 ? 
C1B S1A C1C 104.8(2) 2_556 2_556 ? 
C1A S1A C2B 25.39(18) . . ? 
C1B S1A C2B 93.2(3) 2_556 . ? 
C1C S1A C2B 130.8(2) 2_556 . ? 
C1A S1A C6A 129.0(5) . 2_556 ? 
C1B S1A C6A 22.3(3) 2_556 2_556 ? 
C1C S1A C6A 97.5(5) 2_556 2_556 ? 
C2B S1A C6A 112.9(4) . 2_556 ? 
C1A S1A C1B 24.17(19) . . ? 
C1B S1A C1B 89.1(2) 2_556 . ? 
C1C S1A C1B 95.1(2) 2_556 . ? 
C2B S1A C1B 38.84(8) . . ? 
C6A S1A C1B 111.0(4) 2_556 . ? 
C1A S1A C1C 94.8(2) . . ? 
C1B S1A C1C 94.8(2) 2_556 . ? 
C1C S1A C1C 18.2(2) 2_556 . ? 
C2B S1A C1C 117.85(18) . . ? 
C6A S1A C1C 93.9(4) 2_556 . ? 
C1B S1A C1C 79.78(17) . . ? 
C1A S1A S1A 70.91(17) . 2_556 ? 
C1B S1A S1A 64.85(18) 2_556 2_556 ? 
C1C S1A S1A 65.35(14) 2_556 2_556 ? 
C2B S1A S1A 82.92(14) . 2_556 ? 
C6A S1A S1A 79.1(4) 2_556 2_556 ? 
C1B S1A S1A 47.22(10) . 2_556 ? 
C1C S1A S1A 47.26(10) . 2_556 ? 
C2A C1A C6A 120.0 . . ? 
C2A C1A S1A 114.9(3) . . ? 
C6A C1A S1A 125.1(3) . . ? 
C3A C2A C1A 120.0 . . ? 
C3A C2A H2A 120.0 . . ? 
C1A C2A H2A 120.0 . . ? 
C2A C3A C4A 120.0 . . ? 
C2A C3A H3A 120.0 . . ? 
C4A C3A H3A 120.0 . . ? 
C5A C4A C3A 120.0 . . ? 
C5A C4A H4A 120.0 . . ? 
C3A C4A H4A 120.0 . . ? 
C4A C5A C6A 120.0 . . ? 
C4A C5A H5A 120.0 . . ? 
C6A C5A H5A 120.0 . . ? 
C5A C6A C1A 120.0 . . ? 
C5A C6A S1A 149.7(3) . 2_556 ? 
C1A C6A S1A 79.3(3) . 2_556 ? 
C5A C6A H6A 120.0 . . ? 
C1A C6A H6A 120.0 . . ? 
S1A C6A H6A 47.4 2_556 . ? 
C2B C1B C6B 120.0 . . ? 
C2B C1B S1A 123.8(3) . 2_556 ? 
C6B C1B S1A 116.1(3) . 2_556 ? 
C2B C1B S1A 62.9(2) . . ? 
C6B C1B S1A 149.2(3) . . ? 
S1A C1B S1A 67.93(16) 2_556 . ? 
C3B C2B C1B 120.0 . . ? 
C3B C2B S1A 142.7(3) . . ? 
C1B C2B S1A 78.3(3) . . ? 
C3B C2B H2B 120.0 . . ? 
C1B C2B H2B 120.0 . . ? 
S1A C2B H2B 53.7 . . ? 
C2B C3B C4B 120.0 . . ? 
C2B C3B H3B 120.0 . . ? 
C4B C3B H3B 120.0 . . ? 
C3B C4B C5B 120.0 . . ? 
C3B C4B H4B 120.0 . . ? 
C5B C4B H4B 120.0 . . ? 
C6B C5B C4B 120.0 . . ? 
C6B C5B H5B 120.0 . . ? 
C4B C5B H5B 120.0 . . ? 
C5B C6B C1B 120.0 . . ? 
C5B C6B H6B 120.0 . . ? 
C1B C6B H6B 120.0 . . ? 
C2C C1C C6C 120.0 . . ? 
C2C C1C S1A 68.31(18) . . ? 
C6C C1C S1A 147.0(3) . . ? 
C1C C2C C3C 120.0 . . ? 
C1C C2C H2C 120.0 . . ? 
C3C C2C H2C 120.0 . . ? 
C4C C3C C2C 120.0 . . ? 
C4C C3C H3C 120.0 . . ? 
C2C C3C H3C 120.0 . . ? 
C3C C4C C5C 120.0 . . ? 
C3C C4C H4C 120.0 . . ? 
C5C C4C H4C 120.0 . . ? 
C6C C5C C4C 120.0 . . ? 
C6C C5C H5C 120.0 . . ? 
C4C C5C H5C 120.0 . . ? 
C5C C6C C1C 120.0 . . ? 
C5C C6C H6C 120.0 . . ? 
C1C C6C H6C 120.0 . . ? 
 
loop_ 
 _geom_torsion_atom_site_label_1 
 _geom_torsion_atom_site_label_2 
 _geom_torsion_atom_site_label_3 
 _geom_torsion_atom_site_label_4 
 _geom_torsion 
 _geom_torsion_site_symmetry_1 
 _geom_torsion_site_symmetry_2 
 _geom_torsion_site_symmetry_3 
 _geom_torsion_site_symmetry_4 
 _geom_torsion_publ_flag 
C6 C1 C2 F1 -179.9(2) . . . . ? 
C7 C1 C2 F1 4.8(4) . . . . ? 
C6 C1 C2 C3 1.7(4) . . . . ? 
C7 C1 C2 C3 -173.5(3) . . . . ? 
F1 C2 C3 C4 -179.1(2) . . . . ? 
C1 C2 C3 C4 -0.8(4) . . . . ? 
F1 C2 C3 C9 -0.8(4) . . . . ? 
C1 C2 C3 C9 177.6(3) . . . . ? 
C2 C3 C4 F2 178.5(2) . . . . ? 
C9 C3 C4 F2 0.2(4) . . . . ? 
C2 C3 C4 C5 -0.6(4) . . . . ? 
C9 C3 C4 C5 -179.0(3) . . . . ? 
F2 C4 C5 C6 -178.2(2) . . . . ? 
C3 C4 C5 C6 0.9(4) . . . . ? 
F2 C4 C5 C11 -0.2(4) . . . . ? 
C3 C4 C5 C11 178.9(3) . . . . ? 
C2 C1 C6 F3 -179.9(2) . . . . ? 
C7 C1 C6 F3 -4.7(4) . . . . ? 
C2 C1 C6 C5 -1.4(4) . . . . ? 
C7 C1 C6 C5 173.8(3) . . . . ? 
C4 C5 C6 F3 178.6(2) . . . . ? 
C11 C5 C6 F3 0.6(4) . . . . ? 
C4 C5 C6 C1 0.2(4) . . . . ? 
C11 C5 C6 C1 -177.8(3) . . . . ? 
C6 C1 C7 C8 -104(3) . . . . ? 
C2 C1 C7 C8 71(3) . . . . ? 
C1 C7 C8 I1 -21(5) . . . . ? 
C2 C3 C9 C10 -86(16) . . . . ? 
C4 C3 C9 C10 92(16) . . . . ? 
C3 C9 C10 I2 -27(20) . . . . ? 
C4 C5 C11 C12 -80(8) . . . . ? 
C6 C5 C11 C12 98(8) . . . . ? 
C5 C11 C12 I3 39(18) . . . . ? 
C1B S1A C1A C2A 99.8(3) 2_556 . . . ? 
C1C S1A C1A C2A -149.0(3) 2_556 . . . ? 
C2B S1A C1A C2A 39.7(5) . . . . ? 
C6A S1A C1A C2A 97.3(5) 2_556 . . . ? 
C1B S1A C1A C2A 144.6(6) . . . . ? 
C1C S1A C1A C2A -163.7(3) . . . . ? 
S1A S1A C1A C2A 154.8(3) 2_556 . . . ? 
C1B S1A C1A C6A -78.6(4) 2_556 . . . ? 
C1C S1A C1A C6A 32.6(4) 2_556 . . . ? 
C2B S1A C1A C6A -138.8(7) . . . . ? 
C6A S1A C1A C6A -81.2(8) 2_556 . . . ? 
C1B S1A C1A C6A -33.8(5) . . . . ? 
C1C S1A C1A C6A 17.8(4) . . . . ? 
S1A S1A C1A C6A -23.7(3) 2_556 . . . ? 
C6A C1A C2A C3A 0.0 . . . . ? 
S1A C1A C2A C3A -178.6(4) . . . . ? 
C1A C2A C3A C4A 0.0 . . . . ? 
C2A C3A C4A C5A 0.0 . . . . ? 
C3A C4A C5A C6A 0.0 . . . . ? 
C4A C5A C6A C1A 0.0 . . . . ? 
C4A C5A C6A S1A 124.2(5) . . . 2_556 ? 
C2A C1A C6A C5A 0.0 . . . . ? 
S1A C1A C6A C5A 178.4(4) . . . . ? 
C2A C1A C6A S1A -154.9(3) . . . 2_556 ? 
S1A C1A C6A S1A 23.5(3) . . . 2_556 ? 
C1A S1A C1B C2B -41.3(5) . . . . ? 
C1B S1A C1B C2B 96.2(3) 2_556 . . . ? 
C1C S1A C1B C2B -159.0(3) 2_556 . . . ? 
C6A S1A C1B C2B 100.9(5) 2_556 . . . ? 
C1C S1A C1B C2B -168.8(2) . . . . ? 
S1A S1A C1B C2B 151.8(3) 2_556 . . . ? 
C1A S1A C1B C6B 62.4(6) . . . . ? 
C1B S1A C1B C6B -160.0(5) 2_556 . . . ? 
C1C S1A C1B C6B -55.2(4) 2_556 . . . ? 
C2B S1A C1B C6B 103.8(4) . . . . ? 
C6A S1A C1B C6B -155.3(6) 2_556 . . . ? 
C1C S1A C1B C6B -65.0(4) . . . . ? 
S1A S1A C1B C6B -104.4(5) 2_556 . . . ? 
C1A S1A C1B S1A 166.8(6) . . . 2_556 ? 
C1B S1A C1B S1A -55.6(3) 2_556 . . 2_556 ? 
C1C S1A C1B S1A 49.2(2) 2_556 . . 2_556 ? 
C2B S1A C1B S1A -151.8(3) . . . 2_556 ? 
C6A S1A C1B S1A -50.9(5) 2_556 . . 2_556 ? 
C1C S1A C1B S1A 39.40(17) . . . 2_556 ? 
C6B C1B C2B C3B 0.0 . . . . ? 
S1A C1B C2B C3B 176.7(4) 2_556 . . . ? 
S1A C1B C2B C3B 144.9(3) . . . . ? 
C6B C1B C2B S1A -144.9(3) . . . . ? 
S1A C1B C2B S1A 31.8(3) 2_556 . . . ? 
C1A S1A C2B C3B -85.7(6) . . . . ? 
C1B S1A C2B C3B 150.6(4) 2_556 . . . ? 
C1C S1A C2B C3B -96.7(4) 2_556 . . . ? 
C6A S1A C2B C3B 139.8(6) 2_556 . . . ? 
C1B S1A C2B C3B -124.8(3) . . . . ? 
C1C S1A C2B C3B -112.3(4) . . . . ? 
S1A S1A C2B C3B -145.2(4) 2_556 . . . ? 
C1A S1A C2B C1B 39.1(5) . . . . ? 
C1B S1A C2B C1B -84.6(2) 2_556 . . . ? 
C1C S1A C2B C1B 28.1(3) 2_556 . . . ? 
C6A S1A C2B C1B -95.4(5) 2_556 . . . ? 
C1C S1A C2B C1B 12.5(3) . . . . ? 
S1A S1A C2B C1B -20.44(18) 2_556 . . . ? 
C1B C2B C3B C4B 0.0 . . . . ? 
S1A C2B C3B C4B 111.7(4) . . . . ? 
C2B C3B C4B C5B 0.0 . . . . ? 
C3B C4B C5B C6B 0.0 . . . . ? 
C4B C5B C6B C1B 0.0 . . . . ? 
C2B C1B C6B C5B 0.0 . . . . ? 
S1A C1B C6B C5B -176.9(4) 2_556 . . . ? 
S1A C1B C6B C5B -86.6(4) . . . . ? 
C1A S1A C1C C2C 85.2(2) . . . . ? 
C1B S1A C1C C2C -167.5(2) 2_556 . . . ? 
C1C S1A C1C C2C -43.0(10) 2_556 . . . ? 
C2B S1A C1C C2C 96.3(2) . . . . ? 
C6A S1A C1C C2C -145.1(4) 2_556 . . . ? 
C1B S1A C1C C2C 104.3(2) . . . . ? 
S1A S1A C1C C2C 143.6(2) 2_556 . . . ? 
C1A S1A C1C C6C -162.7(4) . . . . ? 
C1B S1A C1C C6C -55.5(4) 2_556 . . . ? 
C1C S1A C1C C6C 69.1(10) 2_556 . . . ? 
C2B S1A C1C C6C -151.6(3) . . . . ? 
C6A S1A C1C C6C -33.1(5) 2_556 . . . ? 
C1B S1A C1C C6C -143.7(4) . . . . ? 
S1A S1A C1C C6C -104.3(4) 2_556 . . . ? 
C6C C1C C2C C3C 0.0 . . . . ? 
S1A C1C C2C C3C 144.4(4) . . . . ? 
C1C C2C C3C C4C 0.0 . . . . ? 
C2C C3C C4C C5C 0.0 . . . . ? 
C3C C4C C5C C6C 0.0 . . . . ? 
C4C C5C C6C C1C 0.0 . . . . ? 
C2C C1C C6C C5C 0.0 . . . . ? 
S1A C1C C6C C5C -96.1(4) . . . . ? 
 
_diffrn_measured_fraction_theta_max    0.990 
_diffrn_reflns_theta_full              27.47 
_diffrn_measured_fraction_theta_full   0.990 
_refine_diff_density_max    1.161 
_refine_diff_density_min   -0.845 
_refine_diff_density_rms    0.094 

#===END


data_1-1-Et3BuNBr 
 
_audit_creation_method            SHELXL-97 
_chemical_name_systematic 
; 
 ? 
; 
_chemical_name_common             ? 
_chemical_melting_point           ? 
_chemical_formula_moiety          
'2(C12 F3 I3), Br' 
 
_chemical_formula_sum 
 'C24 Br F6 I6 ' 
_chemical_formula_weight          1243.55 
 
loop_ 
 _atom_type_symbol 
 _atom_type_description 
 _atom_type_scat_dispersion_real 
 _atom_type_scat_dispersion_imag 
 _atom_type_scat_source 
 'C'  'C'   0.0033   0.0016 
 'International Tables Vol C Tables 4.2.6.8 and 6.1.1.4' 
 'H'  'H'   0.0000   0.0000 
 'International Tables Vol C Tables 4.2.6.8 and 6.1.1.4' 
 'N'  'N'   0.0061   0.0033 
 'International Tables Vol C Tables 4.2.6.8 and 6.1.1.4' 
 'F'  'F'   0.0171   0.0103 
 'International Tables Vol C Tables 4.2.6.8 and 6.1.1.4' 
 'Br'  'Br'  -0.2901   2.4595 
 'International Tables Vol C Tables 4.2.6.8 and 6.1.1.4' 
 'I'  'I'  -0.4742   1.8119 
 'International Tables Vol C Tables 4.2.6.8 and 6.1.1.4' 
 
_symmetry_cell_setting                  'cubic'
_symmetry_space_group_name_H-M          'I a -3'
_symmetry_space_group_name_Hall         '-I 2b 2c 3'
 
loop_ 
 _symmetry_equiv_pos_as_xyz 
 'x, y, z' 
 '-x, -y+1/2, z' 
 'x, -y, -z+1/2' 
 '-x+1/2, y, -z' 
 'z, x, y' 
 'y, z, x' 
 '-z, -x+1/2, y' 
 '-y+1/2, z, -x' 
 'z, -x, -y+1/2' 
 '-y, -z+1/2, x' 
 '-z+1/2, x, -y' 
 'y, -z, -x+1/2' 
 'x+1/2, y+1/2, z+1/2' 
 '-x+1/2, -y+1, z+1/2' 
 'x+1/2, -y+1/2, -z+1' 
 '-x+1, y+1/2, -z+1/2' 
 'z+1/2, x+1/2, y+1/2' 
 'y+1/2, z+1/2, x+1/2' 
 '-z+1/2, -x+1, y+1/2' 
 '-y+1, z+1/2, -x+1/2' 
 'z+1/2, -x+1/2, -y+1' 
 '-y+1/2, -z+1, x+1/2' 
 '-z+1, x+1/2, -y+1/2' 
 'y+1/2, -z+1/2, -x+1' 
 '-x, -y, -z' 
 'x, y-1/2, -z' 
 '-x, y, z-1/2' 
 'x-1/2, -y, z' 
 '-z, -x, -y' 
 '-y, -z, -x' 
 'z, x-1/2, -y' 
 'y-1/2, -z, x' 
 '-z, x, y-1/2' 
 'y, z-1/2, -x' 
 'z-1/2, -x, y' 
 '-y, z, x-1/2' 
 '-x+1/2, -y+1/2, -z+1/2' 
 'x+1/2, y, -z+1/2' 
 '-x+1/2, y+1/2, z' 
 'x, -y+1/2, z+1/2' 
 '-z+1/2, -x+1/2, -y+1/2' 
 '-y+1/2, -z+1/2, -x+1/2' 
 'z+1/2, x, -y+1/2' 
 'y, -z+1/2, x+1/2' 
 '-z+1/2, x+1/2, y' 
 'y+1/2, z, -x+1/2' 
 'z, -x+1/2, y+1/2' 
 '-y+1/2, z+1/2, x' 
 
_cell_length_a                    22.573(5) 
_cell_length_b                    22.573(5) 
_cell_length_c                    22.573(5) 
_cell_angle_alpha                 90.000(5) 
_cell_angle_beta                  90.000(5) 
_cell_angle_gamma                 90.000(5) 
_cell_volume                      11502(4) 
_cell_formula_units_Z             8 
_cell_measurement_temperature     293(2) 
_cell_measurement_reflns_used     7551 
_cell_measurement_theta_min       3.6103  
_cell_measurement_theta_max       27.4599  
 
_exptl_crystal_description        prism 
_exptl_crystal_colour             white
_exptl_crystal_size_max           0.35 
_exptl_crystal_size_mid           0.20 
_exptl_crystal_size_min           0.11 
_exptl_crystal_density_meas       ? 
_exptl_crystal_density_diffrn     1.436 
_exptl_crystal_density_method     'not measured' 
_exptl_crystal_F_000              4408 
_exptl_absorpt_coefficient_mu     3.962 
_exptl_absorpt_correction_type                              multi-scan
_exptl_absorpt_process_details
;
  [Sheldrick, G.M. (2002). SADABS Bruker AXS Inc., Madison, Wisconsin, USA]
;
_exptl_absorpt_correction_T_min             0.402
_exptl_absorpt_correction_T_max             0.647

#----------------------------- Remark --------------------------------#
# SADABS output:                                                          #
# Estimated minimum and maximum transmission:  0.3659  0.7456    #
# The ratio of these values is more reliable than their absolute values!  #
#--------------------------------------------------------------------# 
_exptl_special_details 
; 
 ? 
; 
 
_diffrn_ambient_temperature       293(2)
_diffrn_radiation_wavelength      0.71073
_diffrn_radiation_type            MoK\a
_diffrn_radiation_source          'fine-focus sealed tube'
_diffrn_measurement_device_type   'KappaCCD'
_diffrn_measurement_device        '95mm CCD camera on \k-goniostat'
_diffrn_detector_area_resol_mean  9
_diffrn_radiation_monochromator   'horizonally mounted graphite crystal'
_diffrn_measurement_method        'CCD'
_diffrn_standards_number          ? 
_diffrn_standards_interval_count  ? 
_diffrn_standards_interval_time   ? 
_diffrn_standards_decay_%         ? 
_diffrn_reflns_number             37339 
_diffrn_reflns_av_R_equivalents   0.0946 
_diffrn_reflns_av_sigmaI/netI     0.0335 
_diffrn_reflns_limit_h_min        -29 
_diffrn_reflns_limit_h_max        29 
_diffrn_reflns_limit_k_min        -24 
_diffrn_reflns_limit_k_max        28 
_diffrn_reflns_limit_l_min        -29 
_diffrn_reflns_limit_l_max        29 
_diffrn_reflns_theta_min          3.61 
_diffrn_reflns_theta_max          27.46 
_reflns_number_total              2207 
_reflns_number_gt                 1476 
_reflns_threshold_expression      >2sigma(I) 
 
_computing_data_collection        'Collect (Bruker AXS BV, 1997-2004)'
_computing_cell_refinement        'Dirax/lsq (Duisenberg & Schreurs, 1989-2000)'
_computing_data_reduction         'EvalCCD (Duisenberg & Schreurs 1990-2000)'
_computing_structure_solution     'SIR92 (Altomare et al., 1993)'
_computing_structure_refinement   'SHELXL-97 (Sheldrick, 1997)'
_computing_molecular_graphics     'Ortep-3 for Windows (Farrugia, 1997)'
_computing_publication_material   'WinGX publication routines (Farrugia, 1999)'
 
_refine_special_details 
; 
 Refinement of F^2^ against ALL reflections.  The weighted R-factor wR and 
 goodness of fit S are based on F^2^, conventional R-factors R are based 
 on F, with F set to zero for negative F^2^. The threshold expression of 
 F^2^ > 2sigma(F^2^) is used only for calculating R-factors(gt) etc. and is 
 not relevant to the choice of reflections for refinement.  R-factors based 
 on F^2^ are statistically about twice as large as those based on F, and R- 
 factors based on ALL data will be even larger. 
; 
loop_
  _platon_squeeze_void_nr
  _platon_squeeze_void_average_x
  _platon_squeeze_void_average_y
  _platon_squeeze_void_average_z
  _platon_squeeze_void_volume
  _platon_squeeze_void_count_electrons
  _platon_squeeze_void_content
   1 -0.014  0.003  0.000      6303       725 ' '
_platon_squeeze_details
;
Et3BuN is totally disordered
; 
_refine_ls_structure_factor_coef  Fsqd  
_refine_ls_matrix_type            full 
_refine_ls_weighting_scheme       calc  
_refine_ls_weighting_details 
 'calc w=1/[\s^2^(Fo^2^)+(0.0742P)^2^+105.5284P] where P=(Fo^2^+2Fc^2^)/3' 
_atom_sites_solution_primary      direct 
_atom_sites_solution_secondary    difmap 
_atom_sites_solution_hydrogens    none 
_refine_ls_hydrogen_treatment     none 
_refine_ls_extinction_method      none 
_refine_ls_extinction_coef        ? 
_refine_ls_number_reflns          2207 
_refine_ls_number_parameters      57 
_refine_ls_number_restraints      0 
_refine_ls_R_factor_all           0.1167 
_refine_ls_R_factor_gt            0.0773 
_refine_ls_wR_factor_ref          0.2193 
_refine_ls_wR_factor_gt           0.1902 
_refine_ls_goodness_of_fit_ref    1.173 
_refine_ls_restrained_S_all       1.173 
_refine_ls_shift/su_max           0.000 
_refine_ls_shift/su_mean          0.000 
 
loop_ 
 _atom_site_label 
 _atom_site_type_symbol 
 _atom_site_fract_x 
 _atom_site_fract_y 
 _atom_site_fract_z 
 _atom_site_U_iso_or_equiv 
 _atom_site_adp_type 
 _atom_site_occupancy 
 _atom_site_symmetry_multiplicity 
 _atom_site_calc_flag 
 _atom_site_refinement_flags 
 _atom_site_disorder_assembly 
 _atom_site_disorder_group 
Br Br 0.2500 0.2500 0.2500 0.0635(6) Uani 1 6 d S . . 
I1 I 0.37996(4) 0.21011(4) 0.29730(4) 0.0997(4) Uani 1 1 d . . . 
C4 C 0.5836(5) 0.1562(4) 0.4179(5) 0.074(3) Uani 1 1 d . . . 
C1 C 0.4580(6) 0.1784(6) 0.3287(6) 0.100(4) Uani 1 1 d . . . 
C3 C 0.5560(4) 0.1340(5) 0.3679(5) 0.075(3) Uani 1 1 d . . . 
C2 C 0.5031(5) 0.1588(5) 0.3446(6) 0.092(3) Uani 1 1 d . . . 
F1 F 0.5597(3) 0.2053(3) 0.4417(3) 0.113(3) Uani 1 1 d . . . 
 
loop_ 
 _atom_site_aniso_label 
 _atom_site_aniso_U_11 
 _atom_site_aniso_U_22 
 _atom_site_aniso_U_33 
 _atom_site_aniso_U_23 
 _atom_site_aniso_U_13 
 _atom_site_aniso_U_12 
Br 0.0635(6) 0.0635(6) 0.0635(6) 0.0087(6) 0.0087(6) 0.0087(6) 
I1 0.0785(5) 0.1040(7) 0.1164(7) -0.0088(5) -0.0298(4) 0.0274(4) 
C4 0.077(6) 0.067(5) 0.080(6) -0.015(5) -0.004(5) 0.005(5) 
C1 0.107(9) 0.104(9) 0.090(8) -0.015(7) -0.024(7) 0.045(7) 
C3 0.062(5) 0.074(6) 0.090(7) -0.012(5) -0.012(5) 0.016(5) 
C2 0.060(6) 0.104(8) 0.110(8) -0.003(7) -0.009(6) 0.017(6) 
F1 0.115(5) 0.106(5) 0.119(5) -0.056(4) -0.028(4) 0.046(4) 
 
_geom_special_details 
; 
 All esds (except the esd in the dihedral angle between two l.s. planes) 
 are estimated using the full covariance matrix.  The cell esds are taken 
 into account individually in the estimation of esds in distances, angles 
 and torsion angles; correlations between esds in cell parameters are only 
 used when they are defined by crystal symmetry.  An approximate (isotropic) 
 treatment of cell esds is used for estimating esds involving l.s. planes. 
; 
 
loop_ 
 _geom_bond_atom_site_label_1 
 _geom_bond_atom_site_label_2 
 _geom_bond_distance 
 _geom_bond_site_symmetry_2 
 _geom_bond_publ_flag 
I1 C1 2.028(12) . ? 
C4 F1 1.346(11) . ? 
C4 C3 1.382(13) . ? 
C4 C3 1.392(13) 24 ? 
C1 C2 1.168(14) . ? 
C3 C4 1.392(13) 23_545 ? 
C3 C2 1.420(14) . ? 
 
loop_ 
 _geom_angle_atom_site_label_1 
 _geom_angle_atom_site_label_2 
 _geom_angle_atom_site_label_3 
 _geom_angle 
 _geom_angle_site_symmetry_1 
 _geom_angle_site_symmetry_3 
 _geom_angle_publ_flag 
F1 C4 C3 116.4(9) . . ? 
F1 C4 C3 118.7(9) . 24 ? 
C3 C4 C3 124.9(10) . 24 ? 
C2 C1 I1 177.3(12) . . ? 
C4 C3 C4 115.1(10) . 23_545 ? 
C4 C3 C2 122.6(10) . . ? 
C4 C3 C2 122.2(10) 23_545 . ? 
C1 C2 C3 176.0(15) . . ? 
 
loop_ 
 _geom_torsion_atom_site_label_1 
 _geom_torsion_atom_site_label_2 
 _geom_torsion_atom_site_label_3 
 _geom_torsion_atom_site_label_4 
 _geom_torsion 
 _geom_torsion_site_symmetry_1 
 _geom_torsion_site_symmetry_2 
 _geom_torsion_site_symmetry_3 
 _geom_torsion_site_symmetry_4 
 _geom_torsion_publ_flag 
F1 C4 C3 C4 179.2(7) . . . 23_545 ? 
C3 C4 C3 C4 0(2) 24 . . 23_545 ? 
F1 C4 C3 C2 -4.1(17) . . . . ? 
C3 C4 C3 C2 177.1(8) 24 . . . ? 
I1 C1 C2 C3 -131(26) . . . . ? 
C4 C3 C2 C1 -61(20) . . . . ? 
C4 C3 C2 C1 116(20) 23_545 . . . ? 
 
_diffrn_measured_fraction_theta_max    0.997 
_diffrn_reflns_theta_full              27.46 
_diffrn_measured_fraction_theta_full   0.997 
_refine_diff_density_max    1.068 
_refine_diff_density_min   -0.552 
_refine_diff_density_rms    0.154 

#===END

data_1-1-Et3SI 
 
_audit_creation_method            SHELXL-97 
_chemical_name_systematic 
; 
 ? 
; 
_chemical_name_common             ? 
_chemical_melting_point           ? 
_chemical_formula_moiety  
' 4(C12 F3 I3), 2(C6 H15 S), 2(I)'         
_chemical_formula_sum 
 'C60 H30 F12 I14 S2' 
_chemical_formula_weight          2799.40 
 
loop_ 
 _atom_type_symbol 
 _atom_type_description 
 _atom_type_scat_dispersion_real 
 _atom_type_scat_dispersion_imag 
 _atom_type_scat_source 
 'C'  'C'   0.0033   0.0016 
 'International Tables Vol C Tables 4.2.6.8 and 6.1.1.4' 
 'H'  'H'   0.0000   0.0000 
 'International Tables Vol C Tables 4.2.6.8 and 6.1.1.4' 
 'F'  'F'   0.0171   0.0103 
 'International Tables Vol C Tables 4.2.6.8 and 6.1.1.4' 
 'S'  'S'   0.1246   0.1234 
 'International Tables Vol C Tables 4.2.6.8 and 6.1.1.4' 
 'I'  'I'  -0.4742   1.8119 
 'International Tables Vol C Tables 4.2.6.8 and 6.1.1.4' 
 
_symmetry_cell_setting            cubic
_symmetry_space_group_name_H-M    Pa-3
_symmetry_space_group_name_Hall   '-P 2ac 2ab'

 
loop_ 
 _symmetry_equiv_pos_as_xyz 
 'x, y, z' 
 '-x+1/2, -y, z+1/2' 
 'x+1/2, -y+1/2, -z' 
 '-x, y+1/2, -z+1/2' 
 'z, x, y' 
 'y, z, x' 
 '-z+1/2, -x, y+1/2' 
 '-y, z+1/2, -x+1/2' 
 'z+1/2, -x+1/2, -y' 
 '-y+1/2, -z, x+1/2' 
 '-z, x+1/2, -y+1/2' 
 'y+1/2, -z+1/2, -x' 
 '-x, -y, -z' 
 'x-1/2, y, -z-1/2' 
 '-x-1/2, y-1/2, z' 
 'x, -y-1/2, z-1/2' 
 '-z, -x, -y' 
 '-y, -z, -x' 
 'z-1/2, x, -y-1/2' 
 'y, -z-1/2, x-1/2' 
 '-z-1/2, x-1/2, y' 
 'y-1/2, z, -x-1/2' 
 'z, -x-1/2, y-1/2' 
 '-y-1/2, z-1/2, x' 
 
_cell_length_a                    22.4310(15) 
_cell_length_b                    22.4310(15) 
_cell_length_c                    22.4310(15) 
_cell_angle_alpha                 90.00 
_cell_angle_beta                  90.00 
_cell_angle_gamma                 90.00 
_cell_volume                      11286.2(13) 
_cell_formula_units_Z             4 
_cell_measurement_temperature     150(2)
_cell_measurement_reflns_used            6530
_cell_measurement_theta_min              2.57
_cell_measurement_theta_max             22.37
 
 
_exptl_crystal_description        cubic
_exptl_crystal_colour             colorless
_exptl_crystal_size_max           0.1
_exptl_crystal_size_mid           0.1
_exptl_crystal_size_min           0.1
_exptl_crystal_density_meas       ? 
_exptl_crystal_density_diffrn     1.648 
_exptl_crystal_density_method     'not measured' 
_exptl_crystal_F_000              5008 
_exptl_absorpt_coefficient_mu     3.920 
_exptl_absorpt_correction_type                              multi-scan
_exptl_absorpt_process_details
;
  [Sheldrick, G.M. (2002). SADABS Bruker AXS Inc., Madison, Wisconsin, USA]
;
_exptl_absorpt_correction_T_min                      0.676
_exptl_absorpt_correction_T_max                      0.682

#----------------------------- Remark ------------------------------------#
# SADABS output:                                                          #
# Estimated minimum and maximum transmission:  0.6484  0.7456             #
# The ratio of these values is more reliable than their absolute values!  #
#-------------------------------------------------------------------------#

 
_diffrn_measurement_device_type         'APEXII, Bruker-AXS'
_diffrn_measurement_method              'CCD rotation images, thin slices'
_diffrn_detector                        'CCD plate'
_diffrn_ambient_temperature             150(2)
_diffrn_radiation_wavelength            0.71073
_diffrn_radiation_type                  MoK\a
_diffrn_radiation_monochromator         graphite
_diffrn_radiation_probe                 x-ray
_diffrn_standards_number          ? 
_diffrn_standards_interval_count  ? 
_diffrn_standards_interval_time   ? 
_diffrn_standards_decay_%         ? 
_diffrn_reflns_number             38676 
_diffrn_reflns_av_R_equivalents   0.0507 
_diffrn_reflns_av_sigmaI/netI     0.0381 
_diffrn_reflns_limit_h_min        -20 
_diffrn_reflns_limit_h_max        25 
_diffrn_reflns_limit_k_min        -25 
_diffrn_reflns_limit_k_max        29 
_diffrn_reflns_limit_l_min        -29 
_diffrn_reflns_limit_l_max        23 
_diffrn_reflns_theta_min          1.57 
_diffrn_reflns_theta_max          27.47 
_reflns_number_total              4318 
_reflns_number_gt                 2659 
_reflns_threshold_expression      >2sigma(I) 
 
_computing_data_collection              'Bruker SAINT (Bruker, 2002)'
_computing_cell_refinement              'Bruker SMART (Bruker, 2002)'
_computing_data_reduction               'Bruker SAINT (Bruker, 2002)'
_computing_structure_solution           'SIR97 (ALtomare et al., 1999))'
_computing_structure_refinement         'SHELXL-97 (Sheldrick, 1997)'
_computing_molecular_graphics           'Ortep-3 for Windows (Farrugia, 1997)'
_computing_publication_material  'WinGX publication routines (Farrugia, 1999)'


_refine_special_details 
; 
 Refinement of F^2^ against ALL reflections.  The weighted R-factor wR and 
 goodness of fit S are based on F^2^, conventional R-factors R are based 
 on F, with F set to zero for negative F^2^. The threshold expression of 
 F^2^ > 2sigma(F^2^) is used only for calculating R-factors(gt) etc. and is 
 not relevant to the choice of reflections for refinement.  R-factors based 
 on F^2^ are statistically about twice as large as those based on F, and R- 
 factors based on ALL data will be even larger. 
; 
# SQUEEZE RESULTS (APPEND TO CIF)
loop_
  _platon_squeeze_void_nr
  _platon_squeeze_void_average_x
  _platon_squeeze_void_average_y
  _platon_squeeze_void_average_z
  _platon_squeeze_void_volume
  _platon_squeeze_void_count_electrons
         1     0.000     0.000     0.500     597.5     279.3
         2     0.000     0.500     0.000     597.6     278.5
         3     0.071     0.688     0.718       9.1       1.4
         4     0.071     0.812     0.218       9.1       0.4
         5     0.188     0.718     0.429       9.1       1.5
         6     0.188     0.782     0.929       9.1       1.5
         7     0.217     0.071     0.812       9.1       0.2
         8     0.217     0.429     0.312       9.1       0.6
         9     0.500     0.000     0.000     597.5     278.9
        10     0.500     0.500     0.500     597.1     277.7
        11     0.282     0.571     0.812       9.1       1.1
        12     0.282     0.929     0.312       9.1       1.5
        13     0.312     0.218     0.429       9.1       0.9
        14     0.312     0.282     0.929       9.1       0.8
        15     0.429     0.188     0.718       9.1       1.9
        16     0.429     0.312     0.218       9.1       1.3
        17     0.571     0.688     0.782       9.1       0.9
        18     0.571     0.812     0.282       9.1       0.6
        19     0.688     0.718     0.071       9.1       1.6
        20     0.688     0.782     0.571       9.1       1.3
        21     0.717     0.071     0.688       9.1       0.9
        22     0.717     0.429     0.188       9.1       1.4
        23     0.782     0.571     0.688       9.1       1.7
        24     0.782     0.929     0.188       9.1       1.9
        25     0.812     0.218     0.071       9.1       1.0
        26     0.812     0.282     0.571       9.1       0.9
        27     0.929     0.188     0.782       9.1       1.9
        28     0.929     0.312     0.282       9.1       1.0
_platon_squeeze_details
; ?
;

 
_refine_ls_structure_factor_coef  Fsqd  
_refine_ls_matrix_type            full 
_refine_ls_weighting_scheme       calc  
_refine_ls_weighting_details 
 'calc w=1/[\s^2^(Fo^2^)+(0.1424P)^2^+0.0000P] where P=(Fo^2^+2Fc^2^)/3' 
_atom_sites_solution_primary      direct 
_atom_sites_solution_secondary    difmap 
_atom_sites_solution_hydrogens    geom 
_refine_ls_hydrogen_treatment     constr 
_refine_ls_extinction_method      none 
_refine_ls_extinction_coef        ? 
_refine_ls_number_reflns          4318 
_refine_ls_number_parameters      144 
_refine_ls_number_restraints      4 
_refine_ls_R_factor_all           0.1010 
_refine_ls_R_factor_gt            0.0644 
_refine_ls_wR_factor_ref          0.2397 
_refine_ls_wR_factor_gt           0.2187 
_refine_ls_goodness_of_fit_ref    1.100 
_refine_ls_restrained_S_all       1.101 
_refine_ls_shift/su_max           0.001 
_refine_ls_shift/su_mean          0.000 
 
loop_ 
 _atom_site_label 
 _atom_site_type_symbol 
 _atom_site_fract_x 
 _atom_site_fract_y 
 _atom_site_fract_z 
 _atom_site_U_iso_or_equiv 
 _atom_site_adp_type 
 _atom_site_occupancy 
 _atom_site_symmetry_multiplicity 
 _atom_site_calc_flag 
 _atom_site_refinement_flags 
 _atom_site_disorder_assembly 
 _atom_site_disorder_group 
C1 C 0.4233(5) 0.9258(4) 0.6480(5) 0.068(3) Uani 1 1 d . . . 
C2 C 0.4519(5) 0.8750(4) 0.6267(4) 0.063(2) Uani 1 1 d . . . 
C3 C 0.5030(5) 0.8525(5) 0.6523(5) 0.071(3) Uani 1 1 d . . . 
C5 C 0.5468(6) 0.8332(5) 0.6707(5) 0.082(3) Uani 1 1 d . . . 
C6 C 0.5888(4) 0.5925(4) 0.6651(4) 0.057(2) Uani 1 1 d . . . 
C7 C 0.5640(4) 0.6423(4) 0.6393(4) 0.052(2) Uani 1 1 d . . . 
C8 C 0.5100(4) 0.6672(4) 0.6616(4) 0.057(2) Uani 1 1 d . . . 
C9 C 0.4652(5) 0.6906(4) 0.6794(4) 0.064(3) Uani 1 1 d . . . 
F1 F 0.4479(3) 0.9534(3) 0.6976(3) 0.0806(17) Uani 1 1 d . . . 
F2 F 0.5627(3) 0.5696(2) 0.7140(2) 0.0665(14) Uani 1 1 d . . . 
I1 I 0.62684(3) 0.79779(3) 0.70389(3) 0.0668(3) Uani 1 1 d . . . 
I2 I 0.38488(3) 0.72101(3) 0.70471(3) 0.0640(3) Uani 1 1 d . . . 
I3 I 0.25167(5) 0.75167(5) 0.74833(5) 0.0504(5) Uani 0.50 3 d SP . . 
I4 I 0.5000 0.0000 0.5000 0.0843(6) Uani 1 6 d S . . 
S1 S 0.5846(3) 0.0082(3) 0.6380(4) 0.064(2) Uani 0.33 1 d PD . . 
C11 C 0.6490(8) 0.0068(10) 0.5963(11) 0.163(7) Uani 0.67 1 d PD . . 
C10 C 0.5567(11) 0.0779(6) 0.6562(13) 0.163(7) Uani 0.67 1 d PD . . 
C12 C 0.607(3) -0.0062(19) 0.7094(11) 0.163(7) Uani 0.33 1 d PD . . 
H12A H 0.6496 -0.0045 0.7045 0.196 Uiso 0.33 1 calc PR . . 
H12B H 0.5967 0.0314 0.7281 0.196 Uiso 0.33 1 calc PR . . 
C13 C 0.603(3) -0.0473(18) 0.7625(16) 0.163(7) Uani 0.33 1 d PD . . 
H13A H 0.6312 -0.0354 0.7920 0.245 Uiso 0.33 1 calc PR . . 
H13B H 0.6106 -0.0875 0.7501 0.245 Uiso 0.33 1 calc PR . . 
H13C H 0.5632 -0.0451 0.7791 0.245 Uiso 0.33 1 calc PR . . 
 
loop_ 
 _atom_site_aniso_label 
 _atom_site_aniso_U_11 
 _atom_site_aniso_U_22 
 _atom_site_aniso_U_33 
 _atom_site_aniso_U_23 
 _atom_site_aniso_U_13 
 _atom_site_aniso_U_12 
C1 0.066(6) 0.066(6) 0.071(6) 0.015(5) -0.010(5) -0.004(5) 
C2 0.081(7) 0.050(5) 0.058(6) -0.004(4) 0.007(5) -0.004(5) 
C3 0.051(6) 0.065(6) 0.096(8) 0.017(6) -0.005(5) 0.011(5) 
C5 0.105(10) 0.065(7) 0.076(7) -0.010(6) 0.024(7) -0.015(7) 
C6 0.057(5) 0.054(5) 0.062(6) 0.001(4) -0.003(4) 0.005(4) 
C7 0.063(5) 0.044(5) 0.048(5) 0.002(4) -0.003(4) 0.002(4) 
C8 0.060(6) 0.049(5) 0.062(6) 0.011(4) 0.011(4) 0.012(4) 
C9 0.072(7) 0.056(6) 0.064(6) 0.013(5) 0.002(5) 0.000(5) 
F1 0.089(4) 0.083(4) 0.070(4) -0.015(3) -0.006(3) -0.007(3) 
F2 0.075(4) 0.072(3) 0.052(3) 0.017(3) 0.018(3) 0.013(3) 
I1 0.0640(4) 0.0642(5) 0.0724(5) -0.0016(3) -0.0088(3) -0.0020(3) 
I2 0.0634(4) 0.0648(5) 0.0639(4) 0.0095(3) 0.0154(3) 0.0167(3) 
I3 0.0504(5) 0.0504(5) 0.0504(5) -0.0078(5) -0.0078(5) 0.0078(5) 
I4 0.0843(6) 0.0843(6) 0.0843(6) -0.0039(6) -0.0039(6) 0.0039(6) 
S1 0.053(4) 0.055(4) 0.086(5) -0.003(4) 0.015(4) -0.022(3) 
C11 0.22(2) 0.090(10) 0.176(16) -0.006(10) -0.036(15) -0.083(12) 
C10 0.22(2) 0.090(10) 0.176(16) -0.006(10) -0.036(15) -0.083(12) 
C12 0.22(2) 0.090(10) 0.176(16) -0.006(10) -0.036(15) -0.083(12) 
C13 0.22(2) 0.090(10) 0.176(16) -0.006(10) -0.036(15) -0.083(12) 
 
_geom_special_details 
; 
 All esds (except the esd in the dihedral angle between two l.s. planes) 
 are estimated using the full covariance matrix.  The cell esds are taken 
 into account individually in the estimation of esds in distances, angles 
 and torsion angles; correlations between esds in cell parameters are only 
 used when they are defined by crystal symmetry.  An approximate (isotropic) 
 treatment of cell esds is used for estimating esds involving l.s. planes. 
; 
 
loop_ 
 _geom_bond_atom_site_label_1 
 _geom_bond_atom_site_label_2 
 _geom_bond_distance 
 _geom_bond_site_symmetry_2 
 _geom_bond_publ_flag 
C1 C2 1.367(13) 11_656 ? 
C1 F1 1.388(11) . ? 
C1 C2 1.390(14) . ? 
C2 C1 1.367(13) 12_466 ? 
C2 C3 1.379(14) . ? 
C3 C5 1.151(14) . ? 
C5 I1 2.099(14) . ? 
C6 F2 1.346(10) . ? 
C6 C7 1.375(11) . ? 
C6 C7 1.397(12) 5 ? 
C7 C6 1.397(12) 6 ? 
C7 C8 1.425(12) . ? 
C8 C9 1.202(13) . ? 
C9 I2 2.008(11) . ? 
S1 C12 1.707(10) . ? 
S1 C11 1.721(10) . ? 
S1 C10 1.733(10) . ? 
C11 C10 1.49(3) 23_566 ? 
C10 C11 1.49(3) 24_655 ? 
C12 C13 1.509(10) . ? 
C12 H12A 0.9700 . ? 
C12 H12B 0.9700 . ? 
C13 H13A 0.9600 . ? 
C13 H13B 0.9600 . ? 
C13 H13C 0.9600 . ? 
 
loop_ 
 _geom_angle_atom_site_label_1 
 _geom_angle_atom_site_label_2 
 _geom_angle_atom_site_label_3 
 _geom_angle 
 _geom_angle_site_symmetry_1 
 _geom_angle_site_symmetry_3 
 _geom_angle_publ_flag 
C2 C1 F1 115.9(10) 11_656 . ? 
C2 C1 C2 126.8(11) 11_656 . ? 
F1 C1 C2 117.3(9) . . ? 
C1 C2 C3 124.1(10) 12_466 . ? 
C1 C2 C1 113.2(11) 12_466 . ? 
C3 C2 C1 122.7(10) . . ? 
C5 C3 C2 176.4(13) . . ? 
C3 C5 I1 179.7(13) . . ? 
F2 C6 C7 118.6(8) . . ? 
F2 C6 C7 118.4(8) . 5 ? 
C7 C6 C7 123.1(9) . 5 ? 
C6 C7 C6 116.9(9) . 6 ? 
C6 C7 C8 121.0(8) . . ? 
C6 C7 C8 122.0(8) 6 . ? 
C9 C8 C7 177.1(10) . . ? 
C8 C9 I2 172.8(9) . . ? 
C12 S1 C11 105(2) . . ? 
C12 S1 C10 93(2) . . ? 
C11 S1 C10 116.6(12) . . ? 
C10 C11 S1 104.9(15) 23_566 . ? 
C11 C10 S1 124.6(18) 24_655 . ? 
C13 C12 S1 147(3) . . ? 
C13 C12 H12A 100.1 . . ? 
S1 C12 H12A 100.1 . . ? 
C13 C12 H12B 100.1 . . ? 
S1 C12 H12B 100.1 . . ? 
H12A C12 H12B 104.2 . . ? 
C12 C13 H13A 109.5 . . ? 
C12 C13 H13B 109.5 . . ? 
H13A C13 H13B 109.5 . . ? 
C12 C13 H13C 109.5 . . ? 
H13A C13 H13C 109.5 . . ? 
H13B C13 H13C 109.5 . . ? 
 
loop_ 
 _geom_torsion_atom_site_label_1 
 _geom_torsion_atom_site_label_2 
 _geom_torsion_atom_site_label_3 
 _geom_torsion_atom_site_label_4 
 _geom_torsion 
 _geom_torsion_site_symmetry_1 
 _geom_torsion_site_symmetry_2 
 _geom_torsion_site_symmetry_3 
 _geom_torsion_site_symmetry_4 
 _geom_torsion_publ_flag 
C2 C1 C2 C1 2(2) 11_656 . . 12_466 ? 
F1 C1 C2 C1 -178.0(5) . . . 12_466 ? 
C2 C1 C2 C3 178.8(8) 11_656 . . . ? 
F1 C1 C2 C3 -0.9(15) . . . . ? 
C1 C2 C3 C5 39(20) 12_466 . . . ? 
C1 C2 C3 C5 -138(19) . . . . ? 
C2 C3 C5 I1 -18(100) . . . . ? 
F2 C6 C7 C6 179.6(5) . . . 6 ? 
C7 C6 C7 C6 -1.4(18) 5 . . 6 ? 
F2 C6 C7 C8 -3.6(13) . . . . ? 
C7 C6 C7 C8 175.4(7) 5 . . . ? 
C6 C7 C8 C9 153(21) . . . . ? 
C6 C7 C8 C9 -30(22) 6 . . . ? 
C7 C8 C9 I2 133(19) . . . . ? 
C12 S1 C11 C10 89(2) . . . 23_566 ? 
C10 S1 C11 C10 -169.8(19) . . . 23_566 ? 
C12 S1 C10 C11 -119(3) . . . 24_655 ? 
C11 S1 C10 C11 132(2) . . . 24_655 ? 
C11 S1 C12 C13 -118(9) . . . . ? 
C10 S1 C12 C13 123(10) . . . . ? 
 
_diffrn_measured_fraction_theta_max    1.000 
_diffrn_reflns_theta_full              27.47 
_diffrn_measured_fraction_theta_full   1.000 
_refine_diff_density_max    1.706 
_refine_diff_density_min   -0.819 
_refine_diff_density_rms    0.280 

#===END
